# Supplementary material for: Mechanochemical synthesis of coumarins via Pechmann condensation under solvent-free conditions: an easy access to coumarins and annulated pyrano[2,3-f] and [3,2-f]indoles
Source: Royal Society of Chemistry journal article supplement (doi:10.1039/d1gc04564d), 2022-01-01
Supplement: d1gc04564d1.pdf [file d1gc04564d1.pdf]

## Electronic Supplementary Information

### Mechanochemical synthesis of coumarins via Pechmann condensation under solvent-free conditions: An easy access to coumarins and annulated pyrano[2,3-*f*] and [3,2-*f*]indoles

*Ainur D. Sharapov, Ramil F. Fatykhov, Igor A. Khalymbadzha,\* Vladimir V. Sharutin, Sougata Santra,\* Grigory V. Zyryanov, Oleg N. Chupakhin and Brindaban C. Ranu\**

#### Table of Contents

|                                                                                                          |    |
|----------------------------------------------------------------------------------------------------------|----|
| General Information .....                                                                                | 4  |
| Table 1. Optimization of the reaction conditions .....                                                   | 4  |
| General procedure for the mechanochemical preparation of crude coumarin derivatives 3a-ag and 4a-g ..... | 4  |
| General procedure for the purification of coumarin derivatives 3a-ag .....                               | 4  |
| General procedure for the purification of coumarin derivatives 4a-g .....                                | 4  |
| X-ray crystallographic data .....                                                                        | 5  |
| Calculation of Green Chemistry Metrics (EcoScale and E-factor) .....                                     | 11 |
| References .....                                                                                         | 14 |
| Figure S1. <sup>1</sup> H NMR spectrum of 3a .....                                                       | 15 |
| Figure S2. <sup>1</sup> H NMR spectrum of 3b .....                                                       | 15 |
| Figure S3. View of the reactor with the reaction mass containing compound 3a.....                        | 16 |
| Figure S4. <sup>1</sup> H NMR spectrum of 3c .....                                                       | 16 |
| Figure S5. <sup>1</sup> H NMR spectrum of 3d .....                                                       | 17 |
| Figure S6. <sup>1</sup> H NMR spectrum of 3e .....                                                       | 17 |
| Figure S7. <sup>1</sup> H NMR spectrum of 3f .....                                                       | 18 |
| Figure S8. <sup>1</sup> H NMR spectrum of 3g .....                                                       | 18 |
| Figure S9. <sup>13</sup> C NMR spectrum of 3g .....                                                      | 19 |
| Figure S10. <sup>1</sup> H NMR spectrum of 3h .....                                                      | 19 |
| Figure S11. <sup>1</sup> H NMR spectrum of 3i .....                                                      | 20 |
| Figure S12. <sup>1</sup> H NMR spectrum of 3j .....                                                      | 20 |
| Figure S13. <sup>1</sup> H NMR spectrum of 3k .....                                                      | 21 |
| Figure S14. <sup>1</sup> H NMR spectrum of 3l .....                                                      | 21 |
| Figure S15. <sup>1</sup> H NMR spectrum of 3m .....                                                      | 22 |
| Figure S16. <sup>1</sup> H NMR spectrum of 3n .....                                                      | 22 |
| Figure S17. <sup>1</sup> H NMR spectrum of 3o .....                                                      | 23 |
| Figure S18. <sup>1</sup> H NMR spectrum of 3p .....                                                      | 23 |
| Figure S19. <sup>13</sup> C NMR spectrum of 3p .....                                                     | 24 |
| Figure S20. <sup>1</sup> H NMR spectrum of 3q .....                                                      | 24 |
| Figure S21. <sup>13</sup> C NMR spectrum of 3q .....                                                     | 25 |
| Figure S22. <sup>1</sup> H NMR spectrum of 3r .....                                                      | 25 |
| Figure S23. <sup>13</sup> C NMR spectrum of 3r .....                                                     | 26 |

|                                                         |    |
|---------------------------------------------------------|----|
| Figure S24. <sup>19</sup> F NMR spectrum of 3r .....    | 26 |
| Figure S25. <sup>1</sup> H NMR spectrum of 3s .....     | 27 |
| Figure S26. <sup>1</sup> H NMR spectrum of 3t .....     | 27 |
| Figure S27. <sup>13</sup> C NMR spectrum of 3t .....    | 28 |
| Figure S28. <sup>19</sup> F NMR spectrum of 3t .....    | 28 |
| Figure S29. <sup>1</sup> H NMR spectrum of 3u .....     | 29 |
| Figure S30. <sup>13</sup> C NMR spectrum of 3u .....    | 29 |
| Figure S31. <sup>1</sup> H NMR spectrum of 3v .....     | 30 |
| Figure S32. <sup>13</sup> C NMR spectrum of 3v .....    | 30 |
| Figure S33. Thermal ellipsoid plot of compound 3v ..... | 31 |
| Figure S34. <sup>1</sup> H NMR spectrum of 3w .....     | 31 |
| Figure S35. <sup>13</sup> C NMR spectrum of 3w .....    | 32 |
| Figure S36. <sup>1</sup> H NMR spectrum of 3x .....     | 32 |
| Figure S37. <sup>13</sup> C NMR spectrum of 3x .....    | 33 |
| Figure S38. <sup>1</sup> H NMR spectrum of 3y .....     | 33 |
| Figure S39. <sup>13</sup> C NMR spectrum of 3y .....    | 34 |
| Figure S40. <sup>1</sup> H NMR spectrum of 3z .....     | 34 |
| Figure S41. <sup>1</sup> H NMR spectrum of 3aa .....    | 35 |
| Figure S42. <sup>1</sup> H NMR spectrum of 3ab .....    | 35 |
| Figure S43. <sup>1</sup> H NMR spectrum of 3ac .....    | 36 |
| Figure S44. <sup>1</sup> H NMR spectrum of 3ad .....    | 36 |
| Figure S45. <sup>1</sup> H NMR spectrum of 3ae .....    | 37 |
| Figure S46. <sup>1</sup> H NMR spectrum of 3af .....    | 37 |
| Figure S47. <sup>1</sup> H NMR spectrum of 3ag .....    | 38 |
| Figure S48. <sup>13</sup> C NMR spectrum of 3ag .....   | 38 |
| Figure S49. <sup>1</sup> H NMR spectrum of 4a .....     | 39 |
| Figure S50. <sup>13</sup> C NMR spectrum of 4a .....    | 39 |
| Figure S51. <sup>1</sup> H NMR spectrum of 4b .....     | 40 |
| Figure S52. <sup>13</sup> C NMR spectrum of 4b .....    | 40 |
| Figure S53. <sup>1</sup> H NMR spectrum of 4c .....     | 41 |
| Figure S54. <sup>13</sup> C NMR spectrum of 4c .....    | 41 |
| Figure S55. <sup>13</sup> C NMR spectrum of 4d .....    | 42 |
| Figure S56. <sup>1</sup> H NMR spectrum of 4d .....     | 42 |
| Figure S57. <sup>13</sup> C NMR spectrum of 4e .....    | 43 |
| Figure S58. <sup>1</sup> H NMR spectrum of 4e .....     | 43 |
| Figure S59. <sup>1</sup> H NMR spectrum of 4f .....     | 44 |
| Figure S60. <sup>13</sup> C NMR spectrum of 4f .....    | 44 |
| Figure S61. <sup>1</sup> H NMR spectrum of 4g .....     | 45 |
| Figure S62. <sup>13</sup> C NMR spectrum of 4g .....    | 45 |
| Figure S63. <sup>1</sup> H NMR spectrum of 6a .....     | 46 |
| Figure S64. <sup>13</sup> C NMR spectrum of 6a .....    | 46 |
| Figure S65. <sup>1</sup> H NMR spectrum of 6b .....     | 47 |

Figure S66.  $^{13}\text{C}$  NMR spectrum of 6b .....47

### General Information

All commercially available chemicals were obtained from Aldrich, and used without further purifications. The ball mill was a Retsch PM 100 swing mill. 10 mL stainless steel ball mill vessels were applied for 5-25 mmol runs. Ten stainless steel balls with 5 mm diameter were used, and the milling frequency was at 8.33 Hz at the ambient temperatures. <sup>1</sup>H NMR (400 MHz) and <sup>13</sup>C NMR (101 MHz) spectra were recorded on a Bruker DRX-400 Avance spectrometer with DMSO-d<sub>6</sub> as solvent at ambient temperature. All chemical shifts are given relative to residual signals of solvent. All yields refer to the isolated products.

**Table 1. Optimization of the reaction conditions**

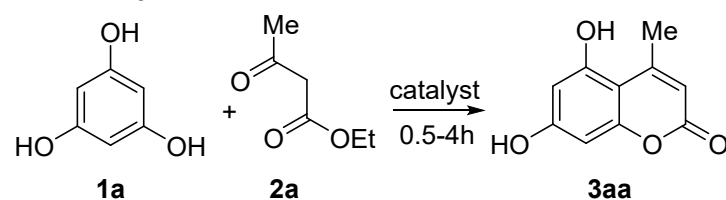

| Entry | catalyst | catalyst loading | scale   | rotation | time  | yield |
|-------|----------|------------------|---------|----------|-------|-------|
| 1     | no       | -                | 5 mmol  | 500 rpm  | 1 h   | 0     |
| 2     | TFA      | 10%              | 5 mmol  | 500 rpm  | 2 h   | 63    |
| 3     | TsOH     | 5%               | 5 mmol  | 500 rpm  | 2 h   | 62    |
| 4     | TsOH     | 10%              | 5 mmol  | 500 rpm  | 2 h   | 71    |
| 5     | MsOH     | 5%               | 5 mmol  | 500 rpm  | 2 h   | 73%   |
| 6     | MsOH     | 10%              | 5 mmol  | 500 rpm  | 2 h   | 87%   |
| 7     | MsOH     | 10%              | 5 mmol  | 500 rpm  | 0.5 h | 74%   |
| 8     | MsOH     | 10%              | 5 mmol  | 500 rpm  | 4 h   | 80%   |
| 9     | MsOH     | 15%              | 5 mmol  | 500 rpm  | 2 h   | 83%   |
| 10    | MsOH     | 10%              | 25 mmol | 500 rpm  | 2 h   | 91%   |
| 11    | MsOH     | 10%              | 5 mmol  | no       | 2 h   | 65%   |

### General procedure for the mechanochemical preparation of crude coumarin derivatives 3a-ag and 4a-g

A mixture of phenol **1** (5.0 mmol, 1.0 equiv), β-ketoester **2** (5.5 mmol, 1.1 equiv), and MsOH (0.5 mmol, 0.1 equiv) were placed in a 10 mL stainless steel jar. Ten 5 mm diameter stainless steel balls were added, and the mixture was milled at 8.33 Hz for 2 h.

### General procedure for the purification of coumarin derivatives 3a-ag

After completion of the mechanochemical synthesis, the resulting paste or solid was transferred from the jar to a 30 mL beaker using 10-15 mL of ethanol (for compounds **3a-e,g-v,x-ag**) or ethanol-water 1:1 mixture (for compounds **3f,w**) and the mixture was heated to reflux (complete dissolution may not occur, but it is sufficient to dissolve unreacted starting materials). Then the reaction mixture was cooled and the coumarin **3** was filtered off and dried to get the pure product.

### General procedure for the purification of coumarin derivatives 4a-g

After completion of the mechanochemical synthesis, the resulting paste or solid was transferred from the jar to a 20 mL beaker using 5 mL of DMF (for compounds **4a-c,e-g**) or DMF or 1:1 DMF-ethanol mixture (for compound **4d**), the mixture was heated to reflux, and then cooled to RT. The precipitate of coumarin **4** was filtered off and dried at 100°C to get the pure product.

### X-ray crystallographic data

Single crystal was grown by the slow evaporation of the solution of compound **3v** in EtOAc. Single crystal X-ray data for the compound **3v** was collected using the Bruker D8 Quest diffractometer. The crystal was kept at 293.15 K during data collection. Using Olex2,<sup>1</sup> the structure was solved with the SHELXT<sup>2</sup> structure solution program using Intrinsic Phasing and refined with the SHELXL<sup>3</sup> refinement package using Least Squares minimization.

**Table 2.** NMR data for compounds **3a-3ag**

| Structure                                                                           | Analytical Data                                                                                                                                                                                                                                                                                                                                                                                                                                                                                                                                                                                                                                                                                                                     |
|-------------------------------------------------------------------------------------|-------------------------------------------------------------------------------------------------------------------------------------------------------------------------------------------------------------------------------------------------------------------------------------------------------------------------------------------------------------------------------------------------------------------------------------------------------------------------------------------------------------------------------------------------------------------------------------------------------------------------------------------------------------------------------------------------------------------------------------|
| 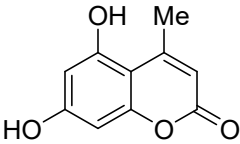   | <i>5,7-Dihydroxy-4-methyl-2H-chromen-2-one</i> <sup>4</sup> ( <b>3a</b> ). Yield 835 mg, 87%. <sup>1</sup> H NMR (400 MHz, DMSO-d <sub>6</sub> ) δ 10.24 (s, 1H), 10.01 (br s, 1H), 6.22 (br s, 1H), 6.12 (s, 1H), 5.73 (s, 1H), 2.52 (s, 3H).                                                                                                                                                                                                                                                                                                                                                                                                                                                                                      |
|    | <i>5,7-Dihydroxy-4-propyl-2H-chromen-2-one</i> <sup>5</sup> ( <b>3b</b> ). Yield 902 mg, 82%. <sup>1</sup> H NMR (400 MHz, DMSO-d <sub>6</sub> ) δ 10.25 (s, 1H), 9.96 (s, 1H), 6.21 (br s, 1H), 6.12 (br s, 1H), 5.70 (s, 1H), 2.84–2.88 (m, 2H), 1.62–1.66 (m, 2H), 0.98–1.01 (m, 3H).                                                                                                                                                                                                                                                                                                                                                                                                                                            |
|   | <i>5,7-Dihydroxy-4-(trifluoromethyl)-2H-chromen-2-one</i> <sup>6</sup> ( <b>3c</b> ). Yield 923 mg, 75%. <sup>1</sup> H NMR (400 MHz, DMSO-d <sub>6</sub> ) δ 10.90 (s, 1H), 10.65 (s, 1H), 6.53 (s, 1H), 6.32 (d, <i>J</i> = 2.2 Hz, 1H), 6.29 (d, <i>J</i> = 2.2 Hz, 1H).                                                                                                                                                                                                                                                                                                                                                                                                                                                         |
|  | <i>5,7-Dihydroxy-4-phenyl-2H-chromen-2-one</i> <sup>6</sup> ( <b>3d</b> ). Yield 851 mg, 67%. <sup>1</sup> H NMR (400 MHz, DMSO-d <sub>6</sub> ) δ 10.21 (s, 1H), 9.95 (s, 1H), 7.31–7.35 (m, 5H), 6.22 (d, <i>J</i> = 1.4 Hz, 1H), 6.13 (d, <i>J</i> = 1.4 Hz, 1H), 5.69 (s, 1H).                                                                                                                                                                                                                                                                                                                                                                                                                                                  |
|  | <i>5,7-Dihydroxy-4-(3,4-dimethoxyphenyl)-2H-chromen-2-one</i> <sup>7</sup> ( <b>3e</b> ). Yield 1194 mg, 76%. <sup>1</sup> H NMR (400 MHz, DMSO-d <sub>6</sub> ) δ 9.99 (s, 1H), 9.74 (s, 1H), 6.83–6.89 (m, 3H), 6.21 (d, <i>J</i> = 2.3 Hz, 1H), 6.13 (d, <i>J</i> = 2.3 Hz, 1H), 5.69 (s, 1H), 3.83 (s, 3H), 3.79 (s, 3H).                                                                                                                                                                                                                                                                                                                                                                                                       |
|  | <i>1,3-Dihydroxy-7,8,9,10-tetrahydro-6H-benzo[c]chromen-6-one</i> <sup>5</sup> ( <b>3f</b> ). Yield 904 mg, 78%. <sup>1</sup> H NMR (400 MHz, DMSO-d <sub>6</sub> ) δ 10.00 (br s, 1H), 9.77 (br s, 1H), 6.18 (br s, 1H), 6.08 (br s, 1H), 3.07 (br s, 2H), 2.36 (br s, 2H), 1.69 (br s, 4H).                                                                                                                                                                                                                                                                                                                                                                                                                                       |
|  | <i>3-Benzyl-8,10-dihydroxy-1,2,3,4-tetrahydro-5H-chromeno[3,4-c]pyridin-5-one</i> ( <b>3g</b> ). Yield 1244 mg, 77%. Off-white solid, m.p. = 238–240°C. <sup>1</sup> H NMR (400 MHz, DMSO-d <sub>6</sub> ) δ 10.36 (br s, 1H), 7.34–7.35 (m, 4H), 7.24–7.28 (m, 1H), 6.24 (d, <i>J</i> = 1.5 Hz, 1H), 6.13 (d, <i>J</i> = 1.5 Hz, 1H), 3.63 (s, 2H), 3.18 (br s, 2H), 3.14 (br s, 2H), 2.60–2.62 (m, 2H). <sup>13</sup> C{ <sup>1</sup> H} NMR (101 MHz, DMSO-d <sub>6</sub> ) δ 160.3, 159.6, 157.8, 154.8, 148.5, 138.1, 128.7, 128.2, 127.0, 114.0, 101.5, 99.4, 94.1, 61.6, 50.7, 48.9, 29.9. Anal. Calcd for C <sub>19</sub> H <sub>17</sub> NO <sub>4</sub> : C, 70.58; H, 5.30; N, 4.33. Found.: C, 70.39; H, 5.38; N, 4.18. |

|                                                                                     |                                                                                                                                                                                                                                                                                                                                                                                                                                                                                                                                                                                                                         |
|-------------------------------------------------------------------------------------|-------------------------------------------------------------------------------------------------------------------------------------------------------------------------------------------------------------------------------------------------------------------------------------------------------------------------------------------------------------------------------------------------------------------------------------------------------------------------------------------------------------------------------------------------------------------------------------------------------------------------|
| 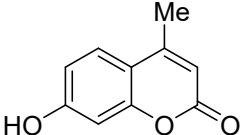   | <i>7-Hydroxy-4-methyl-2H-chromen-2-one</i> <sup>6</sup> ( <b>3h</b> ). Yield 832 mg, 80%. <sup>1</sup> H NMR (400 MHz, DMSO-d <sub>6</sub> ) δ 10.27 (br s, 1H), 7.50 (d, <i>J</i> = 7.0 Hz, 1H), 6.74 (d, <i>J</i> = 7.0 Hz, 1H), 6.65 (s, 1H), 6.02 (s, 1H), 2.37 (s, 3H).                                                                                                                                                                                                                                                                                                                                            |
|    | <i>7-Hydroxy-4-propyl-2H-chromen-2-one</i> <sup>8</sup> ( <b>3i</b> ). Yield 755 mg, 74%. <sup>1</sup> H NMR (400 MHz, DMSO-d <sub>6</sub> ) δ 10.25 (br s, 1H), 7.52 (d, <i>J</i> = 8.7 Hz, 1H), 6.73 (dd, <i>J</i> = 8.7, 2.0 Hz, 1H), 6.66 (d, <i>J</i> = 2.0 Hz, 1H), 5.97 (s, 1H), 2.67–2.71 (m, 2H), 1.65–1.73 (m, 2H), 1.00–1.04 (m, 3H).                                                                                                                                                                                                                                                                        |
|    | <i>7-Hydroxy-4-trifluoromethyl-2H-chromen-2-one</i> <sup>9</sup> ( <b>3j</b> ). Yield 863 mg, 75%. <sup>1</sup> H NMR (400 MHz, DMSO-d <sub>6</sub> ) δ 10.77 (s, 1H), 7.51 (d, <i>J</i> = 8.9 Hz, 1H), 6.86 (dd, <i>J</i> = 8.9, 2.0 Hz, 1H), 6.79 (d, <i>J</i> = 2.0 Hz, 1H), 6.60 (s, 1H).                                                                                                                                                                                                                                                                                                                           |
|    | <i>7-Hydroxy-4-phenyl-2H-chromen-2-one</i> <sup>8</sup> ( <b>3k</b> ). Yield 869 mg, 73%. <sup>1</sup> H NMR (400 MHz, DMSO-d <sub>6</sub> ) δ 10.40 (br s, 1H), 7.52 (br s, 3H), 7.45–7.47 (m, 2H), 7.25 (d, <i>J</i> = 8.7 Hz, 1H), 6.75 (br s, 1H), 6.71 (d, <i>J</i> = 8.7 Hz, 1H), 6.05 (s, 1H).                                                                                                                                                                                                                                                                                                                   |
|    | <i>7-Hydroxy-4-(2-fluorophenyl)-2H-chromen-2-one</i> <sup>10</sup> ( <b>3l</b> ). Yield 829 mg, 61%. <sup>1</sup> H NMR (400 MHz, DMSO-d <sub>6</sub> ) δ 10.45 (s, 1H), 7.55–7.60 (m, 1H), 7.42–7.45 (m, 1H), 7.31–7.38 (m, 2H), 7.01 (dd, <sup>3</sup> <i>J</i> <sub>H-H</sub> = 8.7 Hz, <i>J</i> <sub>H-F</sub> = 1.5 Hz, 1H), 6.76 (d, <i>J</i> = 1.4 Hz, 1H), 6.70 (dd, <sup>3</sup> <i>J</i> <sub>H-H</sub> = 8.7 Hz, <sup>4</sup> <i>J</i> <sub>H-H</sub> = 1.4 Hz, 1H), 6.12 (s, 1H).                                                                                                                           |
|  | <i>7-Hydroxy-4-(3,4-dimethoxyphenyl)-2H-chromen-2-one</i> <sup>7</sup> ( <b>3m</b> ). Yield 1013 mg, 68%. <sup>1</sup> H NMR (400 MHz, DMSO-d <sub>6</sub> ) δ 10.37 (s, 1H), 7.39 (d, <i>J</i> = 7.7 Hz, 1H), 7.02–7.06 (m, 3H), 6.71–6.74 (m, 2H), 6.06 (s, 1H), 3.86 (s, 3H), 3.83 (s, 3H), 6.12 (s, 1H).                                                                                                                                                                                                                                                                                                            |
|  | <i>3-Benzyl-7-hydroxy-4-methyl-2H-chromen-2-one</i> <sup>11</sup> ( <b>3n</b> ). Yield 944 mg, 71%. <sup>1</sup> H NMR (400 MHz, DMSO-d <sub>6</sub> ) δ 10.14 (br s, 1H), 7.52 (d, <i>J</i> = 8.8 Hz, 1H), 7.18–7.24 (m, 4H), 7.12–7.15 (m, 1H), 6.74 (d, <i>J</i> = 8.8 Hz, 1H), 6.66 (s, 1H), 3.92 (s, 2H), 2.38 (s, 3H).                                                                                                                                                                                                                                                                                            |
|  | <i>3-Hydroxy-7,8,9,10-tetrahydro-6H-benzo[c]chromen-6-one</i> <sup>4</sup> ( <b>3o</b> ). Yield 702 mg, 65%. <sup>1</sup> H NMR (400 MHz, DMSO-d <sub>6</sub> ) δ 10.03 (br s, 1H), 7.39 (d, <i>J</i> = 8.5 Hz, 1H), 6.70 (d, <i>J</i> = 8.5 Hz, 1H), 6.62 (s, 1H), 2.71 (br s, 2H), 2.39 (br s, 2H), 1.76–1.79 (m, 4H).                                                                                                                                                                                                                                                                                                |
|  | <i>6-Hexyl-7-hydroxy-4-methyl-2H-chromen-2-one</i> ( <b>3p</b> ). Yield 1209 mg, 93%. Off-white solid, m.p. = 138–140°C. <sup>1</sup> H NMR (400 MHz, DMSO-d <sub>6</sub> ) δ 10.42 (s, 1H), 7.39 (s, 1H), 6.71 (s, 1H), 6.07 (s, 1H), 2.53–2.57 (m, 2H), 2.35 (s, 3H), 1.53 (br s, 2H), 1.27 (br s, 6H), 0.84 (br s, 3H). <sup>13</sup> C{ <sup>1</sup> H} NMR (101 MHz, DMSO-d <sub>6</sub> ) δ 160.4, 159.0, 153.5, 152.9, 126.3, 125.7, 111.6, 110.1, 101.6, 31.1, 29.3 (2C), 28.6, 22.1, 18.1, 13.9. Anal. Calcd for C <sub>16</sub> H <sub>20</sub> O <sub>3</sub> : C, 73.82; H, 7.74. Found: C, 73.67; H, 7.83. |

|                                                                                     |                                                                                                                                                                                                                                                                                                                                                                                                                                                                                                                                                                                                                                                                                                                                                                                                                                                                |
|-------------------------------------------------------------------------------------|----------------------------------------------------------------------------------------------------------------------------------------------------------------------------------------------------------------------------------------------------------------------------------------------------------------------------------------------------------------------------------------------------------------------------------------------------------------------------------------------------------------------------------------------------------------------------------------------------------------------------------------------------------------------------------------------------------------------------------------------------------------------------------------------------------------------------------------------------------------|
| 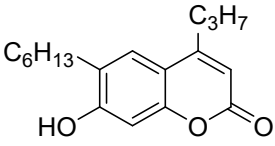   | <p><b>6-Hexyl-7-hydroxy-4-propyl-2H-chromen-2-one (3q).</b> Yield 1282 mg, 89%. Off-white solid, m.p. = 183–185°C. <sup>1</sup>H NMR (400 MHz, DMSO-d<sub>6</sub>) δ 10.42 (s, 1H), 7.43 (s, 1H), 6.72 (s, 1H), 6.02 (s, 1H), 2.67–2.71 (m, 2H), 2.54–2.57 (m, 2H), 1.59–1.65 (m, 2H), 1.52 (br s, 2H), 1.26 (br s, 6H), 0.94–0.98 (m, 3H), 0.84 (br s, 3H). <sup>13</sup>C{<sup>1</sup>H} NMR (101 MHz, DMSO-d<sub>6</sub>) δ 160.5, 158.9, 156.8, 153.2, 126.3, 125.5, 110.8, 109.1, 101.8, 32.8, 31.1, 29.2 (2C), 28.5, 22.1, 21.3, 13.9, 13.6. Anal. Calcd for C<sub>18</sub>H<sub>24</sub>O<sub>3</sub>: C, 74.97; H, 8.39. Found: C, 75.03; H, 8.28.</p>                                                                                                                                                                                                 |
|    | <p><b>6-Hexyl-7-hydroxy-4-trifluoromethyl-2H-chromen-2-one (3r).</b> Yield 1271 mg, 81%. Light purple solid, m.p. = 142–145°C. <sup>1</sup>H NMR (400 MHz, DMSO-d<sub>6</sub>) δ 10.91 (s, 1H), 7.31 (s, 1H), 6.83 (s, 1H), 6.69 (s, 1H), 2.55–2.59 (m, 2H), 1.47–1.53 (m, 2H), 1.26 (br s, 6H), 0.84 (br s, 3H). <sup>13</sup>C{<sup>1</sup>H} NMR (101 MHz, DMSO-d<sub>6</sub>) δ 160.2, 158.9, 154.1, 140.2, 139.7 (q, J = 31.8 Hz), 127.5, 121.8 (q, J = 275.4 Hz) 111.6 (q, J = 5.5 Hz), 104.8, 102.5, 31.0, 29.1, 28.9, 28.3, 22.0, 13.8. <sup>19</sup>F NMR (376 MHz, DMSO-d<sub>6</sub>): δ -63.51 (s, 3F). Anal. Calcd for C<sub>16</sub>H<sub>17</sub>F<sub>3</sub>O<sub>3</sub>: C, 61.14; H, 5.45. Found: C, 61.23; H, 5.51.</p>                                                                                                                   |
|   | <p><b>6-Hexyl-7-hydroxy-4-phenyl-2H-chromen-2-one<sup>12</sup> (3s).</b> Yield 1208 mg, 75%. <sup>1</sup>H NMR (400 MHz, DMSO-d<sub>6</sub>) δ 10.61 (s, 1H), 7.53–7.55 (m, 3H), 7.47–7.49 (m, 2H), 7.08 (s, 1H), 6.83 (s, 1H), 6.09 (s, 1H), 2.44–2.47 (m, 2H), 1.39–1.44 (m, 2H), 1.19 (br s, 6H), 0.78–0.81 (m, 3H).</p>                                                                                                                                                                                                                                                                                                                                                                                                                                                                                                                                    |
|  | <p><b>6-Hexyl-7-hydroxy-4-(2-fluorophenyl)-2H-chromen-2-one (3t).</b> Yield 1139 mg, 67%. Off-white solid, m.p. = 175–177°C. <sup>1</sup>H NMR (400 MHz, DMSO-d<sub>6</sub>) δ 10.70 (s, 1H), 7.63–7.68 (m, 1H), 7.52–7.55 (m, 1H), 7.41–7.48 (m, 2H), 6.88 (br s, 2H), 6.25 (s, 1H), 2.55 (br s, 2H), 1.46 (br s, 2H), 1.24 (br s, 6H), 0.85 (br s, 3H). <sup>13</sup>C{<sup>1</sup>H} NMR (101 MHz, DMSO-d<sub>6</sub>) δ 160.0, 159.5, 158.5 (d, J = 246.2 Hz), 153.3, 150.2, 131.8 (d, J = 8.1 Hz), 130.7, (d, J = 2.4 Hz), 126.8, 126.6, 125.1 (d, J = 3.0 Hz), 122.8 (d, J = 15.4 Hz), 116.0 (d, J = 21.3 Hz), 111.9, 110.2, 101.9, 31.0, 28.9 (2C), 28.2, 22.0, 13.9. <sup>19</sup>F NMR (376 MHz, DMSO-d<sub>6</sub>): δ -113.05 (s, 1F). Anal. Calcd for C<sub>21</sub>H<sub>21</sub>FO<sub>3</sub>: C, 74.10; H, 6.22. Found: C, 74.02; H, 6.31.</p> |
|  | <p><b>6-Hexyl-7-hydroxy-4-(3,4-dimethoxyphenyl)-2H-chromen-2-one (3u).</b> Yield 1225 mg, 64%. Pale purple solid, m.p. = 173–175°C. <sup>1</sup>H NMR (400 MHz, DMSO-d<sub>6</sub>) δ 10.45 (s, 1H), 7.27 (s, 1H), 7.06–7.15 (m, 3H), 6.84 (s, 1H), 6.12 (s, 1H), 3.87 (s, 3H), 3.84 (s, 3H), 2.52–2.55 (m, 2H), 1.46–1.51 (m, 2H), 1.22–1.30 (m, 6H), 0.83–0.86 (m, 3H). <sup>13</sup>C{<sup>1</sup>H} NMR (101 MHz, DMSO-d<sub>6</sub>) δ 160.1, 159.0, 155.0, 153.6, 149.9, 148.7, 127.6, 127.1, 126.2, 120.9, 112.2, 111.9, 110.3, 109.6, 102.0, 55.5 (2C), 30.8, 28.9, 28.8, 28.1, 21.7, 13.6. Anal. Calcd for C<sub>23</sub>H<sub>26</sub>O<sub>5</sub>: C, 72.23; H, 6.85. Found: C, 72.03; H, 6.90.</p>                                                                                                                                                |
|  | <p><b>3-Benzyl-6-hexyl-7-hydroxy-4-methyl-2H-chromen-2-one (3v).</b> Yield 1400 mg, 80%. Peach solid, m.p. = 162–164°C. <sup>1</sup>H NMR (400 MHz, DMSO-d<sub>6</sub>) δ 10.35 (s, 1H), 7.44 (s, 1H), 7.15–7.26 (m, 5H), 6.73 (s, 1H), 3.90 (s, 2H), 2.54–2.58 (m, 2H), 2.37 (s, 3H), 1.50–1.55 (m, 2H), 1.27 (br s, 6H), 0.82–0.84 (m, 3H). <sup>13</sup>C{<sup>1</sup>H} NMR (101 MHz, DMSO-d<sub>6</sub>) δ 161.4,</p>                                                                                                                                                                                                                                                                                                                                                                                                                                     |

|                                                                                     |                                                                                                                                                                                                                                                                                                                                                                                                                                                                                                                                                                                                                                                                                                                                    |
|-------------------------------------------------------------------------------------|------------------------------------------------------------------------------------------------------------------------------------------------------------------------------------------------------------------------------------------------------------------------------------------------------------------------------------------------------------------------------------------------------------------------------------------------------------------------------------------------------------------------------------------------------------------------------------------------------------------------------------------------------------------------------------------------------------------------------------|
|                                                                                     | <p>158.3, 151.5, 148.5 (2C), 139.5, 128.3, 128.0, 126.4, 125.9, 119.9, 112.1, 101.4, 32.1, 31.1, 29.4 (2C), 28.6, 22.1, 15.1, 13.9. Anal. Calcd for C<sub>23</sub>H<sub>26</sub>O<sub>3</sub>: C, 78.83; H, 7.48. Found: C, 78.98; H, 7.56.</p> <p>Crystal Data: monoclinic, space group <i>P</i><sub>2</sub>1/n (no. 14), a = 11.353(8) Å, b = 13.367(8) Å, c = 12.835(7) Å, β = 100.25(2)°, V = 1917(2) Å<sup>3</sup>, Z = 4, T = 293.15 K, μ(MoKα) = 0.079 mm<sup>-1</sup>, Dcalc = 1.214 g/cm<sup>3</sup>, 46605 reflections measured (6.098° ≤ 2θ ≤ 57°), 4847 unique (Rint = 0.0388, Rsigma = 0.0200) which were used in all calculations. The final R1 was 0.0705 (I &gt; 2σ(I)) and wR2 was 0.2405 (all data).</p>         |
| 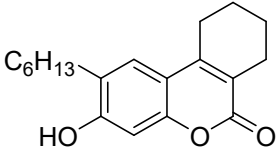   | <p><b>2-Hexyl-3-hydroxy-7,8,9,10-tetrahydro-6H-benzo[c]chromen-6-one (3w)</b>. Yield 1050 mg, 70%. Off-white solid, m.p. = 171–173°C. <sup>1</sup>H NMR (400 MHz, DMSO-d<sub>6</sub>) δ 10.21 (s, 1H), 7.31 (s, 1H), 6.69 (s, 1H), 2.71 (br s, 2H), 2.52–2.56 (m, 2H), 2.35 (br s, 2H), 1.69–1.73 (m, 4H), 1.52 (br s, 2H), 1.27 (br s, 6H), 0.85 (br s, 3H). <sup>13</sup>C{<sup>1</sup>H} NMR (101 MHz, DMSO-d<sub>6</sub>) δ 161.1, 157.7, 151.1, 147.6, 126.1, 124.2, 118.2, 111.6, 101.4, 31.1, 29.3 (2C), 28.6, 24.6, 23.5, 22.1, 21.3, 20.9, 13.9. Anal. Calcd for C<sub>19</sub>H<sub>24</sub>O<sub>3</sub>: C, 75.97; H, 8.05. Found: C, 75.83; H, 7.99.</p>                                                              |
|  | <p><b>3-Benzyl-9-hexyl-8-hydroxy-1,2,3,4-tetrahydro-5H-chromeno[3,4-c]pyridin-5-one (3x)</b>. Yield 1271 mg, 65%. White solid, m.p. = 162–164°C. <sup>1</sup>H NMR (400 MHz, DMSO-d<sub>6</sub>) δ 7.34–7.41 (m, 6H), 6.75 (s, 1H), 3.93 (s, 2H), 3.43–3.47 (m, 1H), 2.96 (s, 4H), 2.55–2.58 (m, 2H), 1.50–1.57 (m, 2H), 1.28 (br s, 6H), 1.04–1.07 (m, 1H), 0.84–0.87 (m, 3H). <sup>13</sup>C{<sup>1</sup>H} NMR (101 MHz, DMSO-d<sub>6</sub>) δ 161.7, 159.3, 158.3, 151.3, 146.1, 135.6, 129.2, 128.2, 127.6, 126.5, 124.3, 114.6, 110.6, 101.5, 60.4, 49.0, 47.6, 30.9, 29.1, 29.0, 28.3, 24.2, 21.8, 13.6. Anal. Calcd for C<sub>25</sub>H<sub>29</sub>NO<sub>3</sub>: C, 76.70; H, 7.47; N, 3.58. Found: C, 76.74; 7.36.</p> |
|  | <p><b>6-Bromo-7-hydroxy-4-propyl-2H-chromen-2-one (3y)</b>. Yield 877 mg, 62%. <sup>1</sup>H NMR (400 MHz, DMSO-d<sub>6</sub>) δ 11.19 (s, 1H), 7.80 (s, 1H), 6.86 (s, 1H), 6.05 (s, 1H), 2.69–2.72 (m, 2H), 1.64–1.70 (m, 2H), 1.02–1.04 (m, 3H). <sup>13</sup>C{<sup>1</sup>H} NMR (101 MHz, DMSO-d<sub>6</sub>) δ 159.9, 157.1, 156.0, 153.9, 128.7, 112.7, 110.2, 106.0, 103.2, 32.5, 21.1, 13.6. Anal. Calcd for C<sub>12</sub>H<sub>11</sub>BrO<sub>3</sub>: C, 50.91; H, 3.92. Found: C, 50.77; H, 3.74.</p>                                                                                                                                                                                                                |
|  | <p><b>7,8-Dihydroxy-4-methyl-2H-chromen-2-one<sup>6</sup> (3z)</b>. Yield 595 mg, 62%. <sup>1</sup>H NMR (400 MHz, DMSO-d<sub>6</sub>) δ 9.69 (br s, 1H), 9.13 (br s, 1H), 7.00 (d, J = 8.6 Hz, 1H), 6.75 (d, J = 8.6 Hz, 1H), 6.02 (s, 1H), 2.36 (s, 3H).</p>                                                                                                                                                                                                                                                                                                                                                                                                                                                                     |
|  | <p><b>7,8-Dihydroxy-4-propyl-2H-chromen-2-one<sup>6</sup> (3aa)</b>. Yield 781 mg, 71%. <sup>1</sup>H NMR (400 MHz, DMSO-d<sub>6</sub>) δ 9.68 (br s, 1H), 9.14 (br s, 1H), 7.03 (d, J = 8.6 Hz, 1H), 6.75 (d, J = 8.6 Hz, 1H), 5.98 (s, 1H), 2.67–2.70 (m, 2H), 1.64–1.70 (m, 2H), 1.01–1.04 (m, 3H).</p>                                                                                                                                                                                                                                                                                                                                                                                                                         |



|                                                                                     |                                                                                                                                                                                                                                                                                                                                                                                                                                                                                                                                                                                                                                                                                                |
|-------------------------------------------------------------------------------------|------------------------------------------------------------------------------------------------------------------------------------------------------------------------------------------------------------------------------------------------------------------------------------------------------------------------------------------------------------------------------------------------------------------------------------------------------------------------------------------------------------------------------------------------------------------------------------------------------------------------------------------------------------------------------------------------|
| 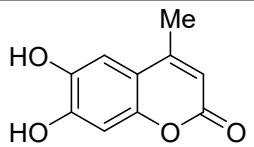   | <i>6,7-Dihydroxy-4-methyl-2H-chromen-2-one</i> <sup>13</sup> ( <b>3ab</b> ). Yield 586 mg, 61%. <sup>1</sup> H NMR (400 MHz, DMSO-d <sub>6</sub> ) δ 9.92 (br s, 1H), 9.01 (br s, 1H), 6.95 (s, 1H), 6.68 (s, 1H), 5.99 (d, <i>J</i> = 1.0 Hz, 1H), 2.32 (d, <i>J</i> = 1.0 Hz, 3H).                                                                                                                                                                                                                                                                                                                                                                                                           |
|    | <i>6,7-Dihydroxy-4-propyl-2H-chromen-2-one</i> <sup>14</sup> ( <b>3ac</b> ). Yield 715 mg, 65%. <sup>1</sup> H NMR (400 MHz, DMSO-d <sub>6</sub> ) δ 9.93 (br s, 1H), 8.97 (br s, 1H), 6.98 (s, 1H), 6.68 (s, 1H), 5.94 (s, 1H), 2.62–2.65 (m, 2H), 1.66–1.71 (m, 2H), 1.01–1.05 (m, 3H).                                                                                                                                                                                                                                                                                                                                                                                                      |
|    | <i>7-Methoxy-4-methyl-2H-chromen-2-one</i> <sup>15</sup> ( <b>3ad</b> ). Yield 608 mg, 64%. <sup>1</sup> H NMR (400 MHz, DMSO-d <sub>6</sub> ) δ 7.61 (d, <i>J</i> = 9.3 Hz, 1H), 6.88–6.90 (m, 2H), 6.11 (s, 1H), 3.87 (s, 3H), 2.41 (s, 3H).                                                                                                                                                                                                                                                                                                                                                                                                                                                 |
|    | <i>Ethyl (2-oxo-4-propyl-2H-chromen-7-yl)carbamate</i> <sup>16</sup> ( <b>3ae</b> ). Yield 702 mg, 51%. <sup>1</sup> H NMR (400 MHz, DMSO-d <sub>6</sub> ) δ 10.11 (s, 1H), 7.72 (d, <i>J</i> = 8.7 Hz, 1H), 7.54 (d, <i>J</i> = 1.0 Hz, 1H), 7.39 (dd, <i>J</i> = 8.7, 1.0 Hz, 1H), 6.16 (s, 1H), 4.17 (q, <i>J</i> = 7.1 Hz, 2H), 2.69–2.73 (m, 2H), 1.58–1.68 (m, 2H), 1.24–1.28 (m, 3H), 0.97 (t, <i>J</i> = 7.1 Hz, 3H).                                                                                                                                                                                                                                                                  |
|   | <i>Ethyl (2-oxo-4-phenyl-2H-chromen-7-yl)carbamate</i> <sup>16</sup> ( <b>3af</b> ). Yield 773 mg, 50%. <sup>1</sup> H NMR (400 MHz, DMSO-d <sub>6</sub> ) δ 10.18 (s, 1H), 7.53–7.64 (m, 6H), 7.36 (br s, 2H), 6.24 (s, 1H), 4.17 (q, <i>J</i> = 6.6 Hz, 2H), 1.26 (t, <i>J</i> = 6.6 Hz, 3H).                                                                                                                                                                                                                                                                                                                                                                                                |
|  | <i>6-Methoxy-4-propyl-2H-benzo[h]chromen-2-one</i> ( <b>3ag</b> ). Yield 804 mg, 60%. Off-white solid, m.p. = 170–172 °C. <sup>1</sup> H NMR (400 MHz, DMSO-d <sub>6</sub> ) δ 8.28–8.29 (m, 1H), 8.15–8.16 (m, 1H), 7.67–7.72 (m, 2H), 6.94 (s, 1H), 6.35 (m, 1H), 4.01 (s, 3H), 2.79–2.82 (m, 2H), 1.66–1.72 (m, 2H), 1.00–1.02 (m, 3H). <sup>13</sup> C{ <sup>1</sup> H} NMR (101 MHz, DMSO-d <sub>6</sub> ) δ 160.3, 157.7, 151.5, 144.8, 128.7, 128.3, 126.8, 123.6, 122.3, 122.1, 114.8, 113.4, 98.1, 56.4, 33.5, 21.2, 14.1. Anal. Calcd for C <sub>17</sub> H <sub>16</sub> O <sub>3</sub> : C, 76.10; H, 6.01. Found: C, 75.93; H, 5.94.                                              |
|  | <i>Ethyl 9-methyl-5-oxo-1,2,3,4,5,10-hexahydroisochromeno[3,4-f]indole-8-carboxylate</i> ( <b>4a</b> ). Yield 1398 mg, 86%. Off-white solid, m.p. > 300 °C. <sup>1</sup> H NMR (400 MHz, DMSO-d <sub>6</sub> ) δ 12.00 (s, 1H), 7.62 (s, 1H), 7.43 (s, 1H), 4.28 (q, <i>J</i> = 7.1 Hz, 2H), 2.75 (s, 2H); 2.66 (s, 3H), 2.38 (s, 2H), 1.68–1.78 (m, 2H), 1.37 (t, 3H). <sup>13</sup> C NMR (101 MHz, DMSO-d <sub>6</sub> ) δ 164.6, 161.0, 148.6, 147.3, 146.9, 131.8, 128.5, 120.2, 114.8, 105.8, 104.9, 102.7, 59.0, 24.6, 23.7, 21.2, 20.9, 14.4, 13.9. Anal. Calcd for C <sub>19</sub> H <sub>19</sub> NO <sub>4</sub> : C, 70.14; H, 5.89; N, 4.31. Found: C, 70.02; H, 5.95; N, 4.27.   |
|  | <i>Ethyl 2-methyl-6-oxo-8-propyl-1,6-dihydropyrano[2,3-f]indole-3-carboxylate</i> ( <b>4b</b> ). Light brown solid, m.p. > 300 °C. Yield 751 mg, 48%. <sup>1</sup> H NMR (400 MHz, DMSO-d <sub>6</sub> ) δ 11.98 (br s, 1H), 7.76 (br s, 1H), 7.67 (br s, 1H), 6.40 (s, 1H), 4.32 (q, <i>J</i> = 6.8 Hz, 2H), 2.74–2.89 (m, 2H), 2.70 (s, 3H), 1.70–1.75 (m, 2H), 1.38 (t, <i>J</i> = 6.8 Hz, 3H), 1.00–1.04 (m, 3H). <sup>13</sup> C{ <sup>1</sup> H} NMR (101 MHz, DMSO-d <sub>6</sub> ) δ 164.3, 160.3, 156.4, 149.1, 148.5, 131.8, 129.5, 113.8, 111.1, 106.2 (2C), 102.9, 58.8, 32.9, 20.9, 14.2, 13.7, 13.5. Anal. Calcd for C <sub>18</sub> H <sub>19</sub> NO <sub>4</sub> : C, 69.00; |

|                                                                                     |                                                                                                                                                                                                                                                                                                                                                                                                                                                                                                                                                                                                                                                                                                                                                                                                         |
|-------------------------------------------------------------------------------------|---------------------------------------------------------------------------------------------------------------------------------------------------------------------------------------------------------------------------------------------------------------------------------------------------------------------------------------------------------------------------------------------------------------------------------------------------------------------------------------------------------------------------------------------------------------------------------------------------------------------------------------------------------------------------------------------------------------------------------------------------------------------------------------------------------|
|                                                                                     | H, 6.11; N, 4.47. Found: C, 68.86; H, 6.23; N, 4.39.                                                                                                                                                                                                                                                                                                                                                                                                                                                                                                                                                                                                                                                                                                                                                    |
| 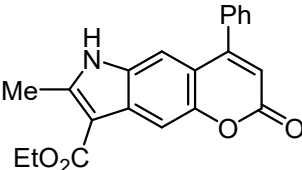   | <p><b>Ethyl 2-methyl-6-oxo-8-phenyl-1,6-dihydropyrano[2,3-f]indole-3-carboxylate (4c).</b> Light brown solid, m.p. &gt; 300 °C. Yield 781 mg, 45%. <sup>1</sup>H NMR (400 MHz, DMSO-d<sub>6</sub>) δ 12.07 (s, 1H), 7.86 (s, 1H), 7.60 (br s, 5H), 7.37 (s, 1H), 6.30 (s, 1H), 4.32 (q, <i>J</i> = 7.1 Hz, 2H), 2.67 (s, 3H), 1.38 (t, <i>J</i> = 7.1 Hz, 3H). <sup>13</sup>C{<sup>1</sup>H} NMR (101 MHz, DMSO-d<sub>6</sub>) δ 164.4, 160.3, 155.7, 149.5, 148.9, 135.4, 131.8, 129.8, 129.5, 128.8, 128.5, 113.6, 112.4, 108.6, 106.5, 103.0, 59.1, 14.4, 14.0. Anal. Calcd for C<sub>21</sub>H<sub>17</sub>NO<sub>4</sub>: C, 72.61; H, 4.93; N, 4.03. Found: C, 72.79; H, 4.98; N, 3.90.</p>                                                                                                       |
|    | <p><b>4,6,7-Triphenylpyrano[3,2-f]indol-2(8H)-one (4d).</b> Off-white solid, m.p. &gt; 300 °C. Yield 1282 mg, 62%. <sup>1</sup>H NMR (400 MHz, DMSO-d<sub>6</sub>) δ 12.01 (s, 1H), 7.26-7.59 (m, 17H), 6.23 (s, 1H). <sup>13</sup>C NMR (101 MHz, DMSO-d<sub>6</sub>) δ 160.3, 156.3, 150.3, 137.9, 136.3, 135.6, 134.1, 131.5, 129.6 (2C), 128.7 (4C), 128.6 (2C), 128.5 (2C), 128.1 (2C), 126.7, 125.8, 117.1, 113.8, 112.6, 111.2, 98.1. Anal. Calcd for C<sub>19</sub>H<sub>19</sub>NO<sub>4</sub>: C, 70.14; H, 5.89; N, 4.31. Found: C, 70.02; H, 5.95; N, 4.27.</p>                                                                                                                                                                                                                             |
|   | <p><b>6,7-Diphenyl-4-(thiophen-2-yl)pyrano[3,2-f]indol-2(8H)-one (4e).</b> Off-white solid, m.p. &gt; 300 °C. Yield 1111 mg, 53%. <sup>1</sup>H NMR (400 MHz, DMSO-d<sub>6</sub>) δ 12.03 (br s, 1H), 8.07 (br s, 1H), 7.87 (br s, 1H), 7.64 (br s, 1H), 7.29-7.47 (m, 13H), 6.35 (br s, 1H). <sup>13</sup>C{<sup>1</sup>H} NMR (101 MHz, DMSO-d<sub>6</sub>) δ 160.05, 150.21, 148.49, 137.9, 136.5, 136.0, 134.1, 131.5, 129.9, 129.6 (2C), 129.5, 128.8 (2C), 128.6 (2C), 128.3, 128.1 (3C), 126.7, 125.9, 116.8, 113.9, 111.7, 111.0, 98.3. Anal. Calcd for C<sub>27</sub>H<sub>17</sub>NO<sub>2</sub>S: C, 77.31; H, 4.08; N, 3.34; S, 7.64. Found: C, 77.16; H, 4.20; N, 3.27; S, 7.73.</p>                                                                                                       |
|  | <p><b>10,11-Diphenyl-1,2,3,4,5,9-hexahydro-6H-cyclohepta[4,5]pyrano[3,2-f]indol-6-one (4f).</b> Off-white solid, m.p. &gt; 300 °C. Yield 1520 mg, 75%. <sup>1</sup>H NMR (600 MHz, DMF-d<sub>7</sub>) δ 11.93 (s, 1H), 7.98 (s, 1H), 7.36-7.58 (m, 11H), 3.05-3.07 (m, 2H), 2.88-2.90 (m, 2H), 1.87-1.89 (m, 2H), 1.65-1.67 (m, 2H), 1.55-1.57 (2H). <sup>13</sup>C{<sup>1</sup>H} NMR (151 MHz, DMF-d<sub>7</sub>) δ 156.0, 150.8, 139.0, 137.5, 136.1, 133.4, 131.3, 130.0, 129.7, 129.4, 129.0, 127.8, 127.4, 125.5, 115.5, 115.4, 115.1, 98.9, 32.8, 28.9, 27.5, 26.9, 26.3. Anal. Calcd for C<sub>28</sub>H<sub>23</sub>NO<sub>2</sub>: C, 82.94; H, 5.72; N, 3.45. Found: C, 82.85; H, 5.80; N, 3.31.</p>                                                                                         |
|  | <p><b>4-Phenyl-6,7-bis(3,4,5-trimethoxyphenyl)pyrano[3,2-f]indol-2(8H)-one (4g).</b> Off-white solid, m.p. 210–212 °C. Yield 2018 mg, 68%. <sup>1</sup>H NMR (400 MHz, DMSO-d<sub>6</sub>) δ 11.96 (s, 1H), 7.61-7.63 (m, 3H), 7.53-7.54 (m, 3H), 7.48 (s, 1H), 6.84 (s, 2H), 6.62 (s, 2H), 6.23 (s, 1H), 3.68 (s, 3H), 3.66 (s, 6H), 3.64 (s, 3H), 3.60 (s, 6H). <sup>13</sup>C{<sup>1</sup>H} NMR (101 MHz, DMSO-d<sub>6</sub>) δ 160.4, 156.4, 153.0 (2C), 152.7 (2C), 150.3, 137.6, 137.5, 136.3, 136.1, 135.8, 129.5, 128.7 (2C), 128.5 (2C), 126.6, 125.6, 117.3, 113.6, 112.6, 111.2, 107.0 (2C), 105.8 (2C), 97.9, 60.14 (3C), 60.07 (3C), 55.8 (6C), 55.7 (6C). Anal. Calcd for C<sub>35</sub>H<sub>31</sub>NO<sub>8</sub>: C, 70.82; H, 5.26; N, 2.36. Found: C, 70.72; H, 5.16; N, 2.51.</p> |

### Decarboxylation of ethyl indole-3-carboxylates

Compound **4a** or **4b** (0.32 mmol) was added to a solution of 0.07 mL H<sub>2</sub>SO<sub>4</sub> in 0.5 mL AcOH. The reaction mixture was stirred under heating for 36 hours, then poured into water and the precipitate was filtered off. The resulting precipitate was purified by flash chromatography (chloroform/silica gel) to give decarboxylated indole **6a** and **6b**, respectively.

| Structure                                                                          | Analytical Data                                                                                                                                                                                                                                                                                                                                                                                                                                                                                                                                                                                                   |
|------------------------------------------------------------------------------------|-------------------------------------------------------------------------------------------------------------------------------------------------------------------------------------------------------------------------------------------------------------------------------------------------------------------------------------------------------------------------------------------------------------------------------------------------------------------------------------------------------------------------------------------------------------------------------------------------------------------|
| 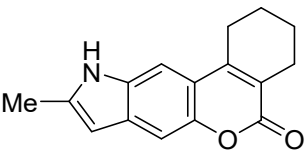  | <p><b>9-Methyl-2,3,4,10-tetrahydroisochromeno[3,4-f]indol-5(1H)-one (6a).</b> Light yellow solid with m.p. = 279–281 °C. Yield 38 mg, 47%. <sup>1</sup>H NMR (400 MHz, DMSO-d<sub>6</sub>) δ 11.19 (s, 1H), 7.51 (s, 1H), 7.33 (s, 1H), 6.21 (s, 1H), 2.84–2.87 (m, 2H), 2.43 (m, 5H), 1.72–1.84 (m, 4H). <sup>13</sup>C{<sup>1</sup>H} NMR (101 MHz, DMSO-d<sub>6</sub>) δ 161.4, 147.9, 145.7, 140.8, 133.4, 130.5, 119.2, 113.6, 104.1, 104.0, 99.3, 24.8, 23.8, 21.4, 21.1, 13.6. Anal. Calcd for C<sub>16</sub>H<sub>15</sub>NO<sub>2</sub>: C, 75.87; H, 5.97; N, 5.53. Found: 75.79; H, 6.08; N, 5.35.</p> |
|  | <p><b>2-Methyl-6-oxo-8-propyl-1,6-dihydropyrano[2,3-f]indole (6b).</b> Light yellow solid with m.p. = 147–149 °C. Yield 32 mg, 41%. <sup>1</sup>H NMR (400 MHz, CDCl<sub>3</sub>) δ 8.15 (br s, 1H), 7.51 (s, 1H), 7.42 (s, 1H), 6.28 (s, 1H), 6.19 (s, 1H), 2.75–2.79 (m, 2H), 1.73–1.80 (m, 2H), 1.04–1.08 (m, 3H). <sup>13</sup>C NMR (101 MHz, CDCl<sub>3</sub>) δ 162.4, 156.7, 148.4, 140.6, 133.4, 132.2, 114.0, 111.4, 106.1, 104.6, 100.9, 34.1, 29.7, 21.6, 14.1, 14.0. Anal. Calcd for C<sub>15</sub>H<sub>15</sub>NO<sub>2</sub>: C, 74.67; H, 6.27; N, 5.81. Found: C, 74.57; H, 6.38; N, 5.64.</p>  |

### Calculation of Green Chemistry Metrics (EcoScale and E-factor)

#### (a) Calculation of EcoScale indexes under ball milling (This work)

The penalty points for synthesis of coumarin derivatives under ball milling (This work)

| Parameter                                               | Penalty |
|---------------------------------------------------------|---------|
| 1. Yields 50-93                                         | 25-3.5  |
| 2. Price of reaction components                         |         |
| β-ketoester                                             | 0       |
| Phenol                                                  | 0       |
| MsOH                                                    | 0       |
| 3. Safety                                               |         |
| non-dangerous for environment, non-toxic, non-flammable | 0       |
| 4. Technical setup                                      |         |
| Unconventional activation technique                     | 2       |
| 5. Temperature/time                                     |         |
| Room temperature < 24 h                                 | 1       |
| 6. Workup and purification                              |         |
| Crystallization and filtration                          | 1       |
| Penalty points total:                                   | 29-7.5  |

$$\text{EcoScale Score} = 100 - \text{Total penalty points} = 71-92.5$$

**EcoScale Score for the synthesis of 5,7-dihydroxy-4-methyl-2H-chromen-2-one (3a) under the ball-milling conditions:**

| Parameter                                                                             | Penalty     |
|---------------------------------------------------------------------------------------|-------------|
| 1. Yields 87%                                                                         | 6.5         |
| 2. Price of reaction components<br>Ethyl acetoacetate<br>3,5-Dihydroxy phenol<br>MsOH | 0<br>0<br>0 |
| 3. Safety<br>non-dangerous for environment, non-toxic, non-flammable                  | 0           |
| 4. Technical setup<br>Unconventional activation technique                             | 2           |
| 5. Temperature/time<br>Room temperature < 24 h                                        | 1           |
| 6. Workup and purification<br>Crystallization and filtration                          | 1           |
| Penalty points total:                                                                 | 10.5        |

**EcoScale Score** = 100 - Total penalty points  
= 89.5

**(b) Calculation of EcoScale index for the synthesis of 5,7-dihydroxy-4-methyl-2H-chromen-2-one (3a) under the conventional stirring under solvent-free heating conditions (*Chem. Lett.*, 2001, 30, 110)<sup>17</sup>**

Penalty points calculations:

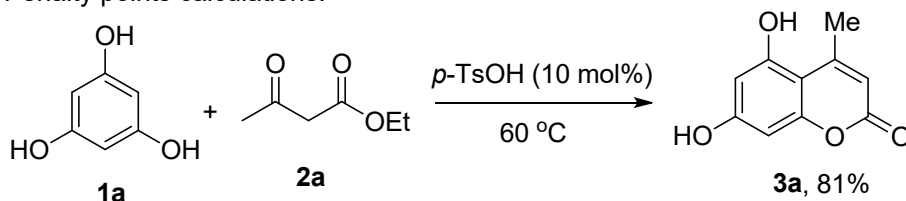

| Parameter                                                                                         | Penalty     |
|---------------------------------------------------------------------------------------------------|-------------|
| 1. Yields 81%                                                                                     | 9.5         |
| 2. Price of reaction components<br>Ethyl acetoacetate<br>3,5-Dihydroxy phenol I<br><i>p</i> -TsOH | 0<br>0<br>0 |
| 3. Safety<br>non-dangerous for environment, non-toxic, non-flammable                              | 0           |
| 4. Technical setup<br>Unconventional activation technique                                         | 2           |
| 5. Temperature/time<br>Room temperature < 1 h                                                     | 0           |
| 6. Workup and purification<br>Crystallization and filtration                                      | 1           |
| Penalty points total:                                                                             | 12.5        |

**EcoScale Score** = 100 - Total penalty points = 87.5

**(c) Calculation of E-factor for the synthesis of 5,7-dihydroxy-4-methyl-2H-chromen-2-one (3a) under the ball-milling conditions (this work):**

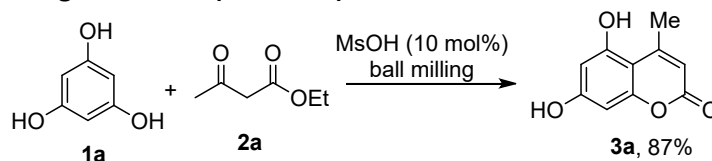

**E-factor calculation for the synthesis of 3a under ball-milling conditions:**

|                           |                                         |         |           |           |
|---------------------------|-----------------------------------------|---------|-----------|-----------|
| Reactant 1 ( <b>1a</b> ): | 3,5-Dihydroxy phenol                    | 0.126 g | 1 mmol    | FW 126.11 |
| Reactant 2 ( <b>2a</b> ): | Ethyl acetoacetate                      | 0.143 g | 1.1 mmol  | FW 130.14 |
| Reagent:                  | MsOH                                    | 0.010 g | 0.1 mmol  | FW 96.11  |
| Solvent:                  | -----                                   | -----   | -----     | -----     |
| Auxiliary (grinding):     | -----                                   | -----   | -----     | -----     |
| Product ( <b>3a</b> ):    | 5,7-dihydroxy-4-methyl-2H-chromen-2-one | 0.167 g | 0.87 mmol | FW 192.17 |

Product yield = 87%

$$\text{E-factor} = \frac{0.126 + 0.143 + 0.010 - (0.167)}{0.167} = 0.67 \text{ Kg waste/1 Kg product}$$

**Note:** (i) Calculations were done on 1 mmol scale. (ii) When the authors have not reported the amount of solvent used in the work-up procedure, we have not accounted for solvent and considered that solvent can be recovered.

**(d) Calculation of E-factor for the synthesis of 5,7-dihydroxy-4-methyl-2H-chromen-2-one (3a) under the conventional stirring under solvent-free heating conditions (*Chem. Lett.*, 2001, 30, 110)<sup>17</sup>**

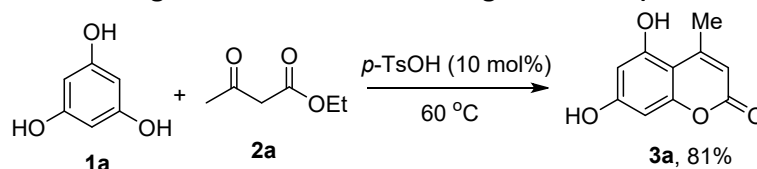

**E-factor calculation for the synthesis of 3a under the conventional stirring under solvent-free heating conditions:**

|                           |                                         |         |           |           |
|---------------------------|-----------------------------------------|---------|-----------|-----------|
| Reactant 1 ( <b>1a</b> ): | 3,5-Dihydroxy phenol                    | 0.126 g | 1 mmol    | FW 126.11 |
| Reactant 2 ( <b>2a</b> ): | Ethyl acetoacetate                      | 0.130 g | 1 mmol    | FW 130.14 |
| Reagent:                  | <i>p</i> -TsOH                          | 0.017 g | 0.1 mmol  | FW 172.20 |
| Solvent:                  | -----                                   | -----   | -----     | -----     |
| Auxiliary (grinding):     | -----                                   | -----   | -----     | -----     |
| Product ( <b>3a</b> ):    | 5,7-dihydroxy-4-methyl-2H-chromen-2-one | 0.155 g | 0.81 mmol | FW 192.17 |

Product yield = 81%

$$\text{E-factor} = \frac{0.126 + 0.130 + 0.017 - (0.155)}{0.155} = 0.76 \text{ Kg waste/1 Kg product}$$

**Note:** (i) Calculations were done on 1 mmol scale. (ii) When the authors have not reported the amount of solvent used in the work-up procedure, we have not accounted for solvent and considered that solvent can be recovered.

## References

1. Dolomanov, O. V.; Bourhis, L. J.; Gildea, R.J.; Howard, J. A. K.; Puschmann, H. OLEX2: a complete structure solution, refinement and analysis program. *J. Appl. Cryst.* **2009**, *42*, 339–341.
2. Sheldrick, G. M. SHELXT - Integrated space-group and crystal-structure determination. *Acta Cryst.* **2015**, *A71*, 3–8.
3. Sheldrick, G. M. Crystal structure refinement with SHELXL. *Acta Cryst.* **2015**, *C71*, 3–8.
4. Sharghi, H.; Jokar, M. Al<sub>2</sub>O<sub>3</sub>/MeSO<sub>3</sub>H (AMA) as a Novel Heterogeneous System for Synthesis of Coumarins under Mild Conditions. *Heterocycles* **2007**, *71*, 2721–2733.
5. Fatykhov, R. F.; Khalymbadzha, I. A.; Chupakhin, O. N.; Charushin, V. N.; Inyutina, A. K.; Slepukhin, P.A.; Kartsev, V. G. 1-Nicotinoylbenzotriazole: A Convenient Tool for Site-Selective Protection of 5,7-Dihydroxycoumarins. *Synthesis* **2019**, *51*, 3617–3624.
6. Jung, K.; Park, Y.-J.; Ryu J.-S. Scandium(III) Triflate–Catalyzed Coumarin Synthesis. *Synth. Commun.* **2008**, *38*, 4395–4406.
7. Wang, B.; Li, N.; Liu, T.; Sun, J.; Wang X. Synthesis and biological evaluation of novel neoflavonoid derivatives as potential antidiabetic agents. *RSC Adv.* **2017**, *7*, 34448–34460.
8. Timonen, J. M.; Nieminen, R. M.; Sareila, O.; Goulas, A.; Moilanen, L. J.; Haukka, M.; Vainiotalo, P.; Moilanen, E.; Aulaskari P. H. Synthesis and anti-inflammatory effects of a series of novel 7-hydroxycoumarin derivatives. *Eur. J. Med. Chem.* **2011**, *46*, 3845–3850.
9. B. Zhang, C. Ge, J. Yao, Y. Liu, H. Xie, J. Fang Selective Selenol Fluorescent Probes: Design, Synthesis, Structural Determinants, and Biological Applications. *J. Am. Chem. Soc.* **2015**, *137*, 757–769.
10. Mzozoyana, V.; van Heerden, F. R.; Grimmer C. Synthesis of 4-(2-fluorophenyl)-7-methoxycoumarin: experimental and computational evidence for intramolecular and intermolecular C–F···H–C bonds. *Beilstein J. Org. Chem.* **2020**, *16*, 190–199.
11. Wang, C.; Zhang, H.; Xu, F.; Niu, Y.; Wu, Y.; Wang, X.; Peng, Y.; Sun, J.; Liang, L.; Xu P. Substituted 3-Benzylcoumarins as Allosteric MEK1 Inhibitors: Design, Synthesis and Biological Evaluation as Antiviral Agents. *Molecules* **2013**, *18*, 6057–6091.
12. Shamsuddin, K. M.; Siddiqui M. J. A. One-pot Synthesis of 4-Phenylcoumarins. *J. Chem. Research (S)* **1998**, 392–393.
13. Wang, P.; Xia, Y.-L.; Yu, Y.; Lu, J.-X.; Zou, L.-W.; Feng, L.; Ge G.-B.; Yang L. Design, synthesis and biological evaluation of esculetin derivatives as anti-tumour agents. *RSC Adv.* **2015**, *5*, 53477–53483.
14. Tiftikçi, E.; Erk Ç. The Synthesis of Novel Crown Ethers, Part X, 4-Propyl-and 3-ethyl-4-methylchromenone-Crown Ethers. *J. Heterocycl. Chem.* **2004**, *41*, 867–871.
15. Montazeri, N.; Khaksar, S.; Nazari, A.; Alavi, S. S.; Vahdat, S. M.; Tajbakhsh M. Pentafluorophenylammonium triflate (PFPAT): An efficient, metal-free and reusable catalyst for the von Pechmann reaction. *J. Fluor. Chem.* **2011**, *132*, 450–452.
16. Reszka P.; Schulz R.; Methling K.; Lalk M.; Bednarski P. J. Synthesis, Enzymatic Evaluation, and Docking Studies of Fluorogenic Caspase Tetrapeptide Substrates. *ChemMedChem* **2010**, *5*, 103–117.
17. Teizo, S.; Koichi, T. Solvent-Free Coumarin Synthesis. *Chem. Lett.* **2001**, *30*, 110-111.

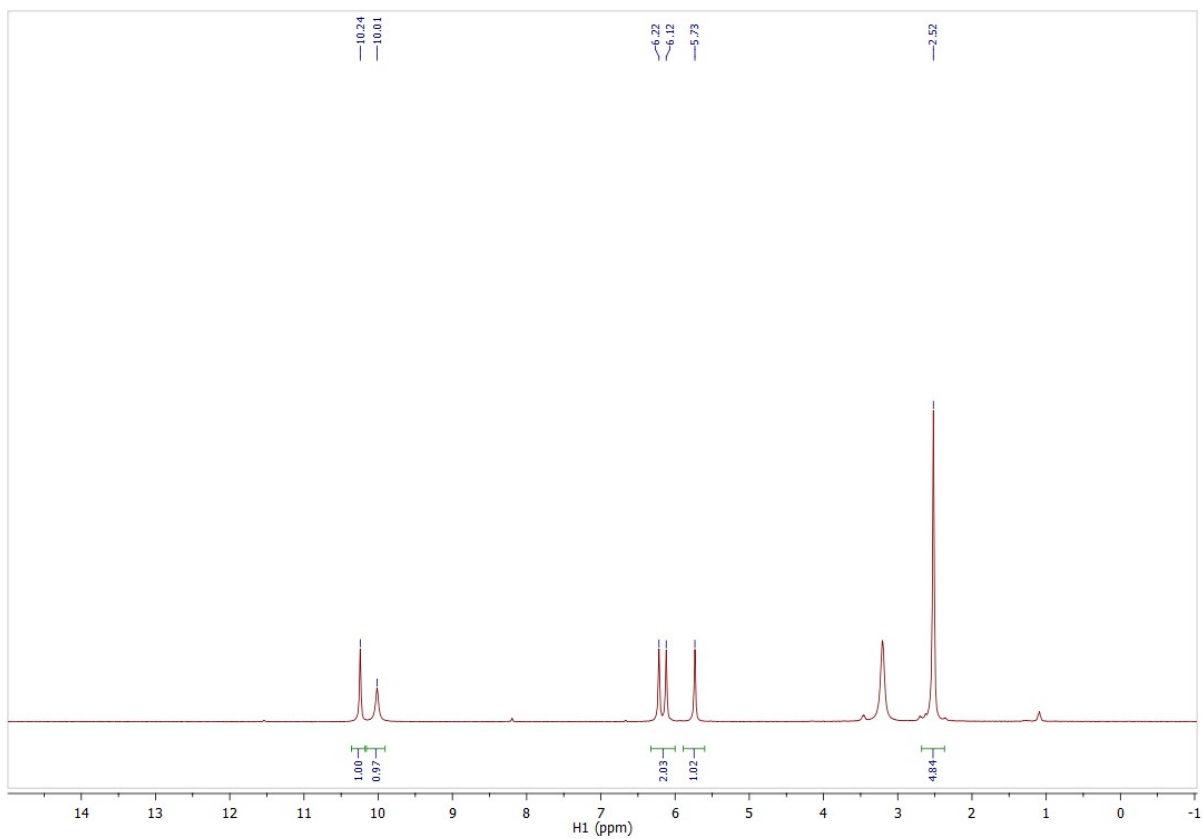

Figure S1. <sup>1</sup>H NMR spectrum of 3a

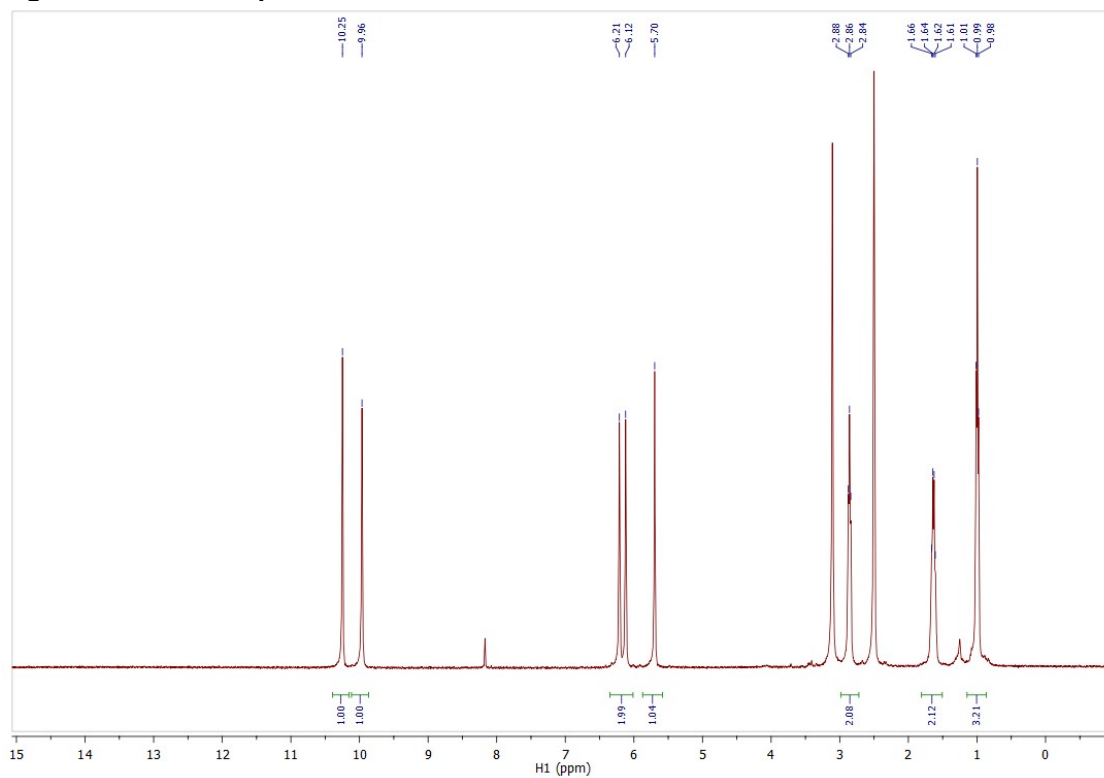

Figure S2. <sup>1</sup>H NMR spectrum of 3b

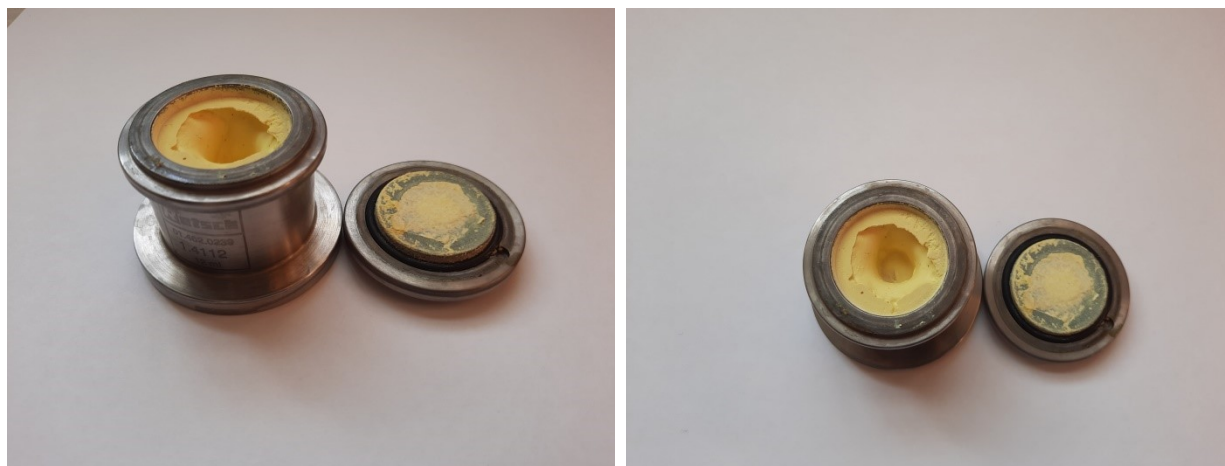

A

B

Figure S3. View of the reactor with the reaction mass containing compound 3a after completion of the reaction; 25 mmol scaling.

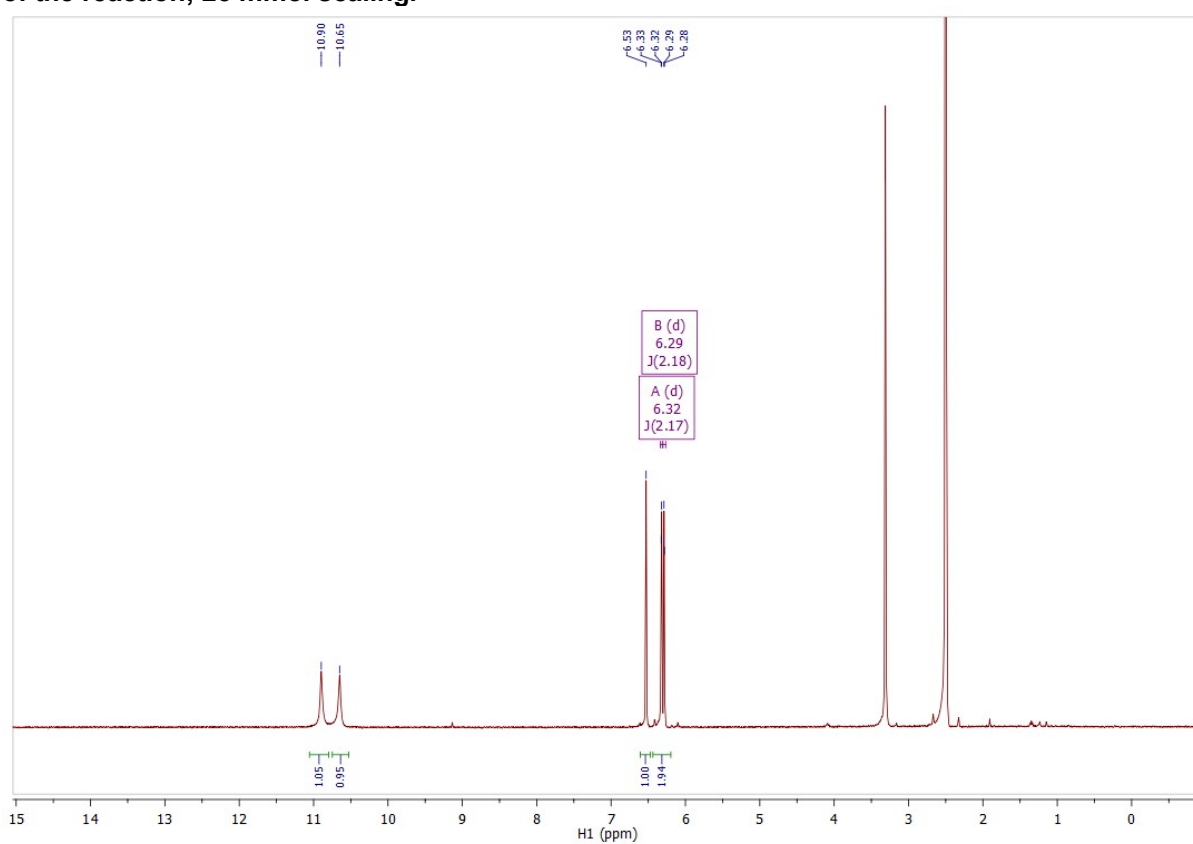

Figure S4.  $^1\text{H}$  NMR spectrum of 3c



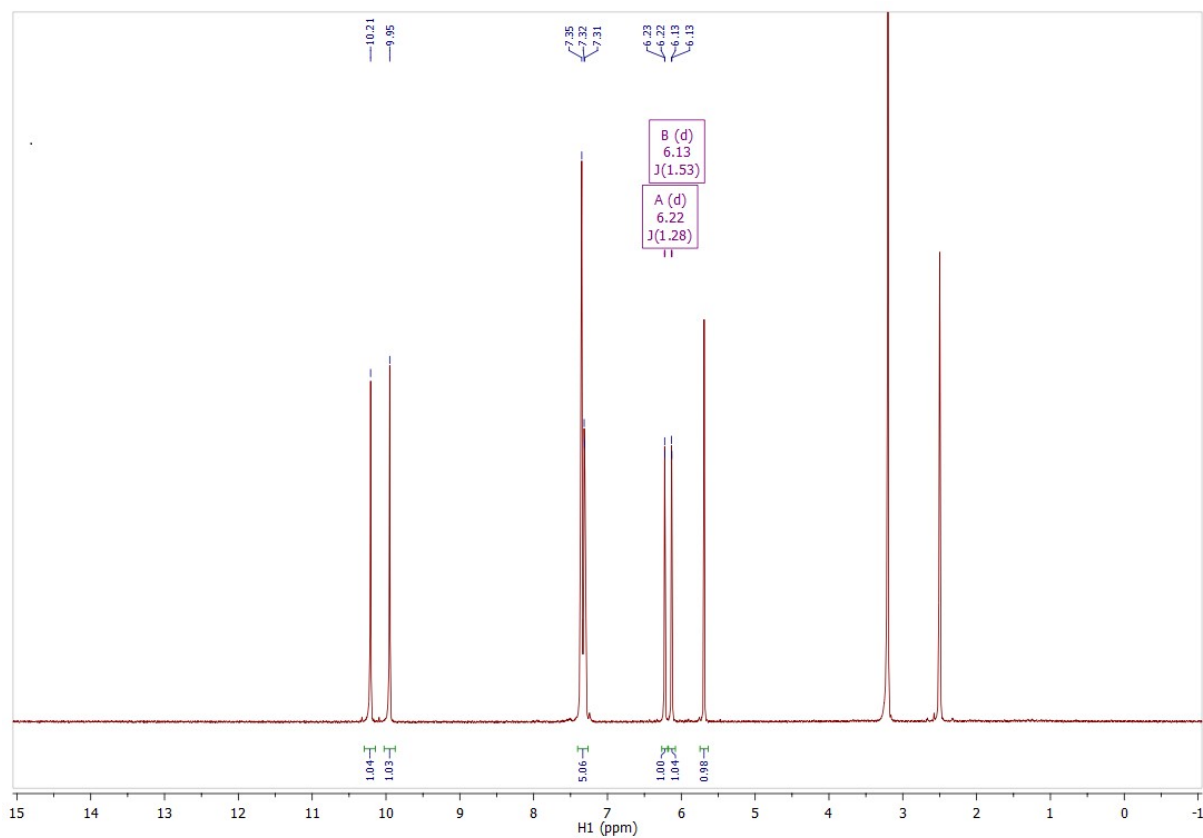

Figure S5. <sup>1</sup>H NMR spectrum of 3d

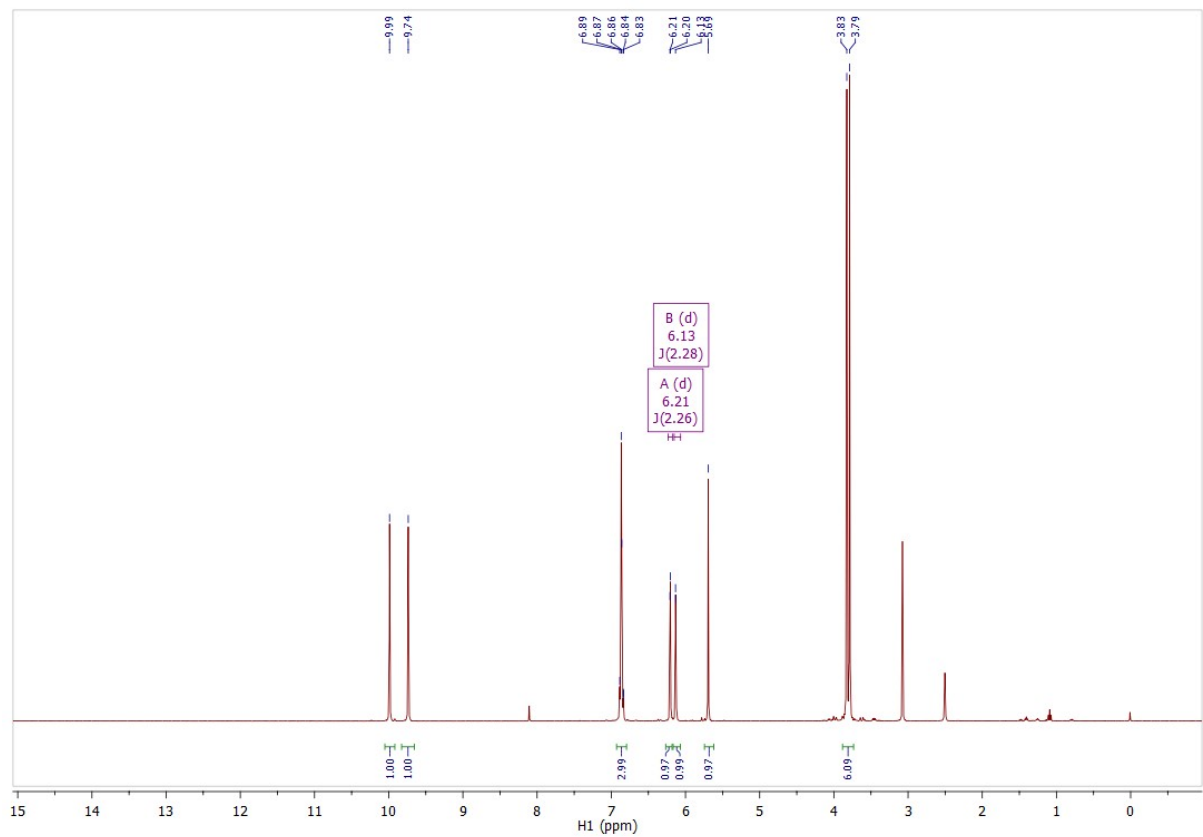

Figure S6. <sup>1</sup>H NMR spectrum of 3e

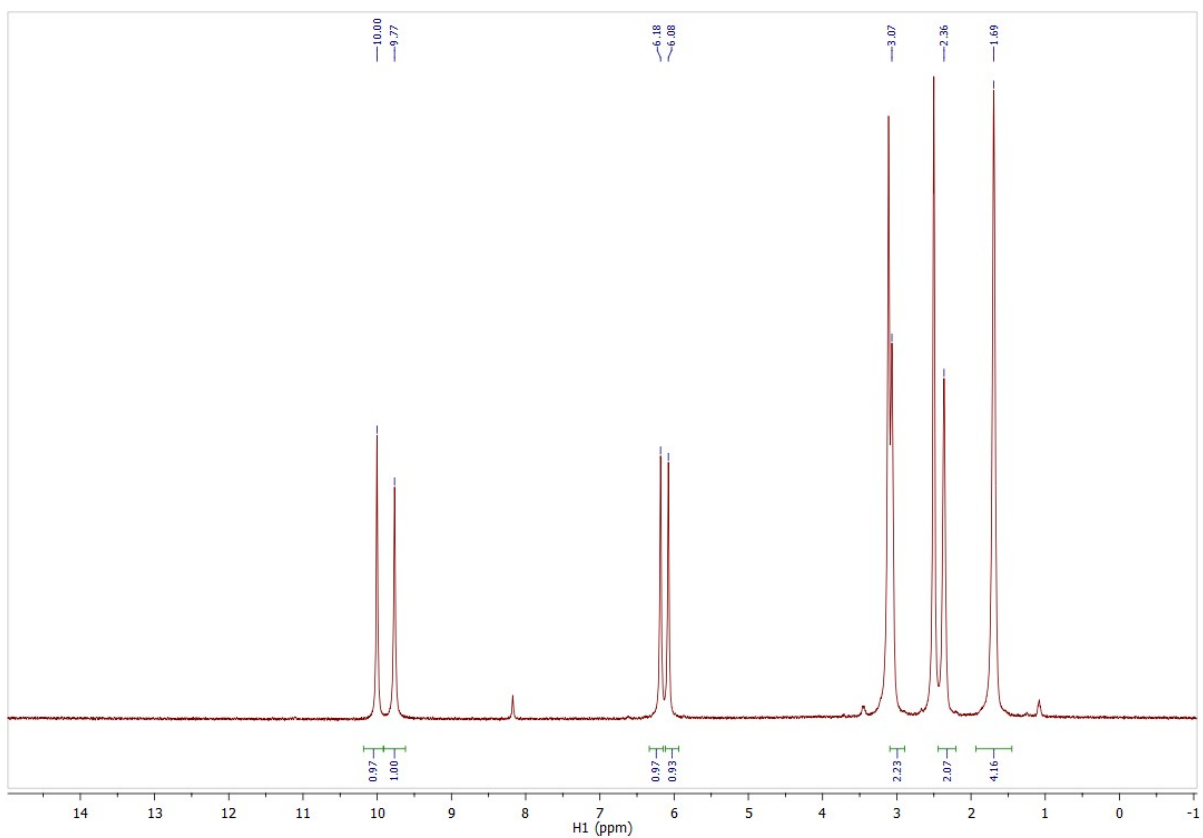

Figure S7. <sup>1</sup>H NMR spectrum of 3f

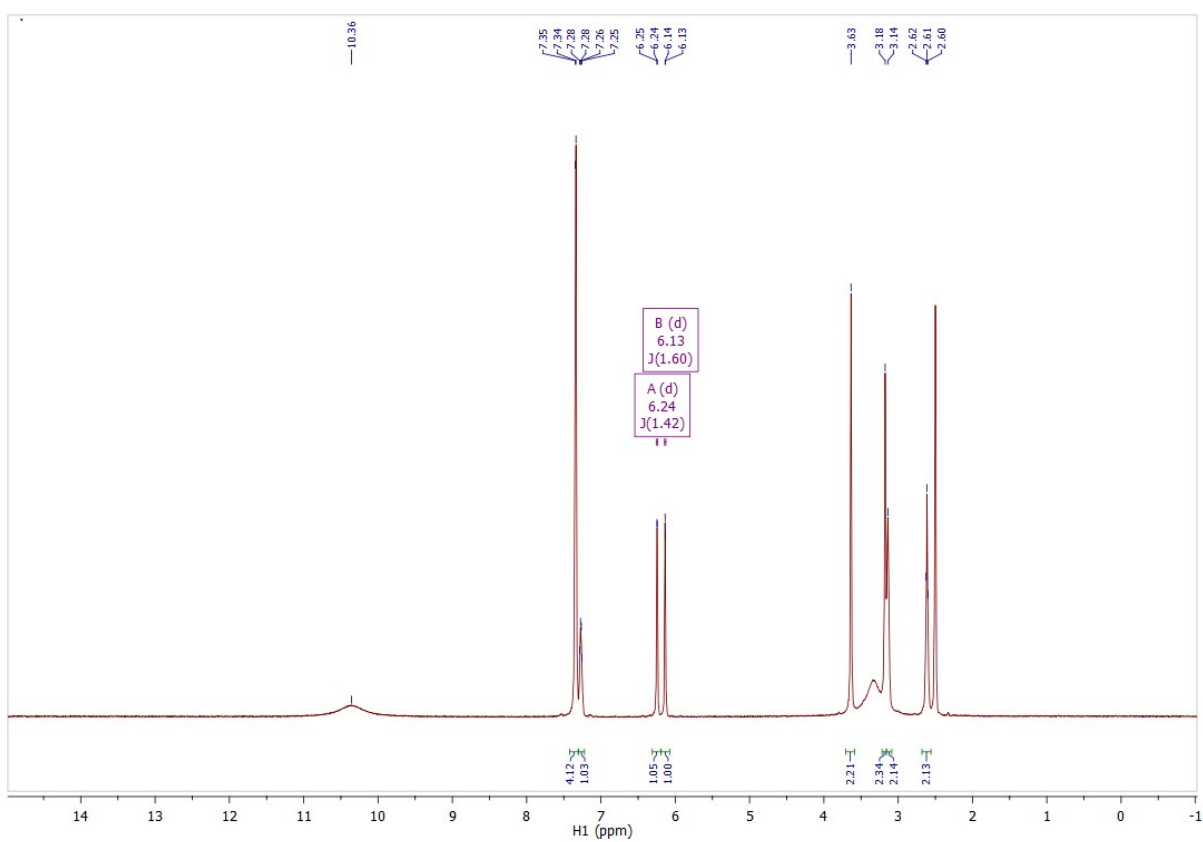

Figure S8. <sup>1</sup>H NMR spectrum of 3g

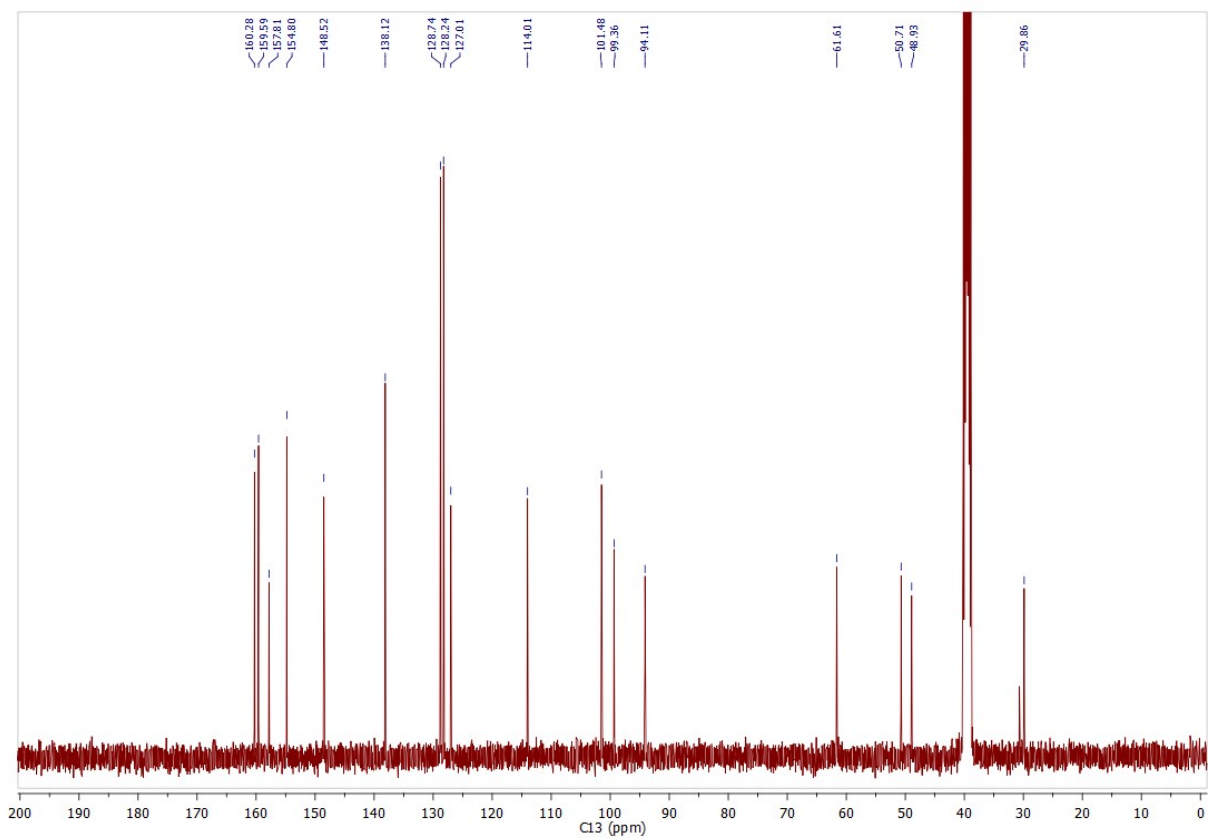

Figure S9. <sup>13</sup>C NMR spectrum of 3g

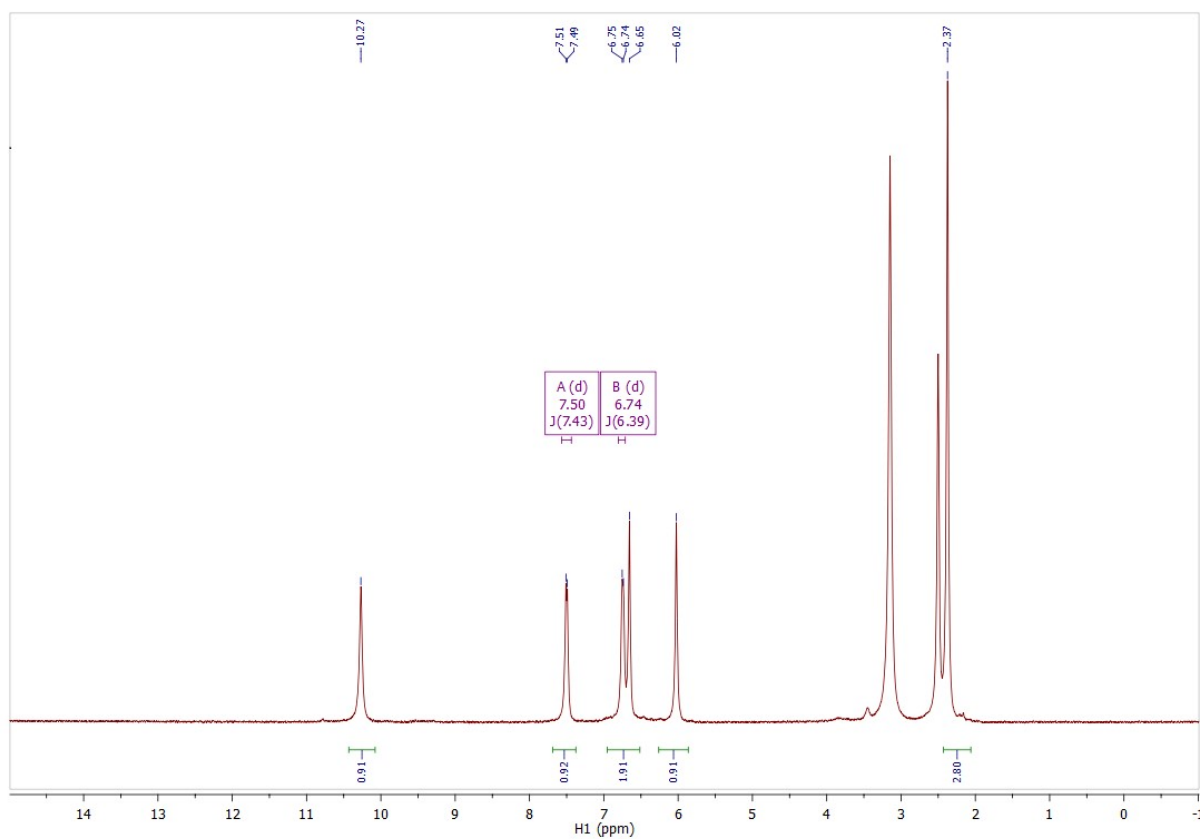

Figure S10. <sup>1</sup>H NMR spectrum of 3h

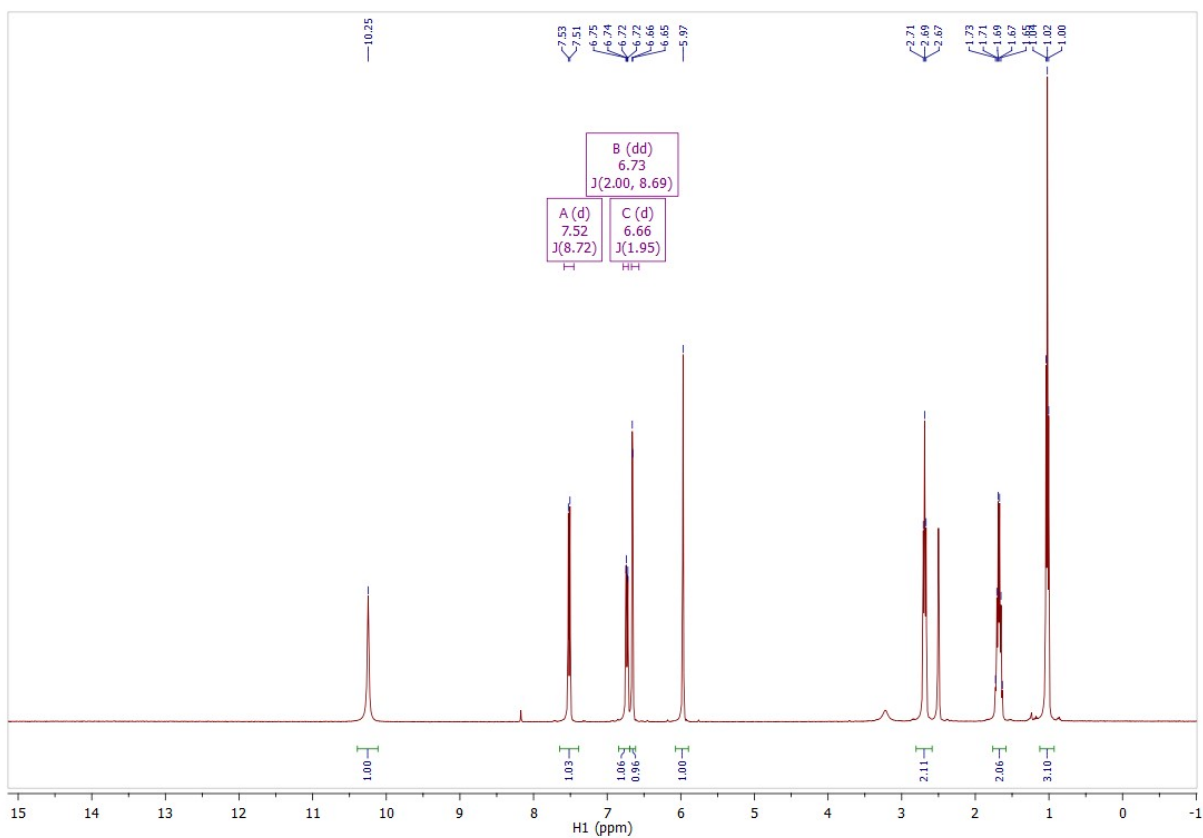

Figure S11. <sup>1</sup>H NMR spectrum of 3i

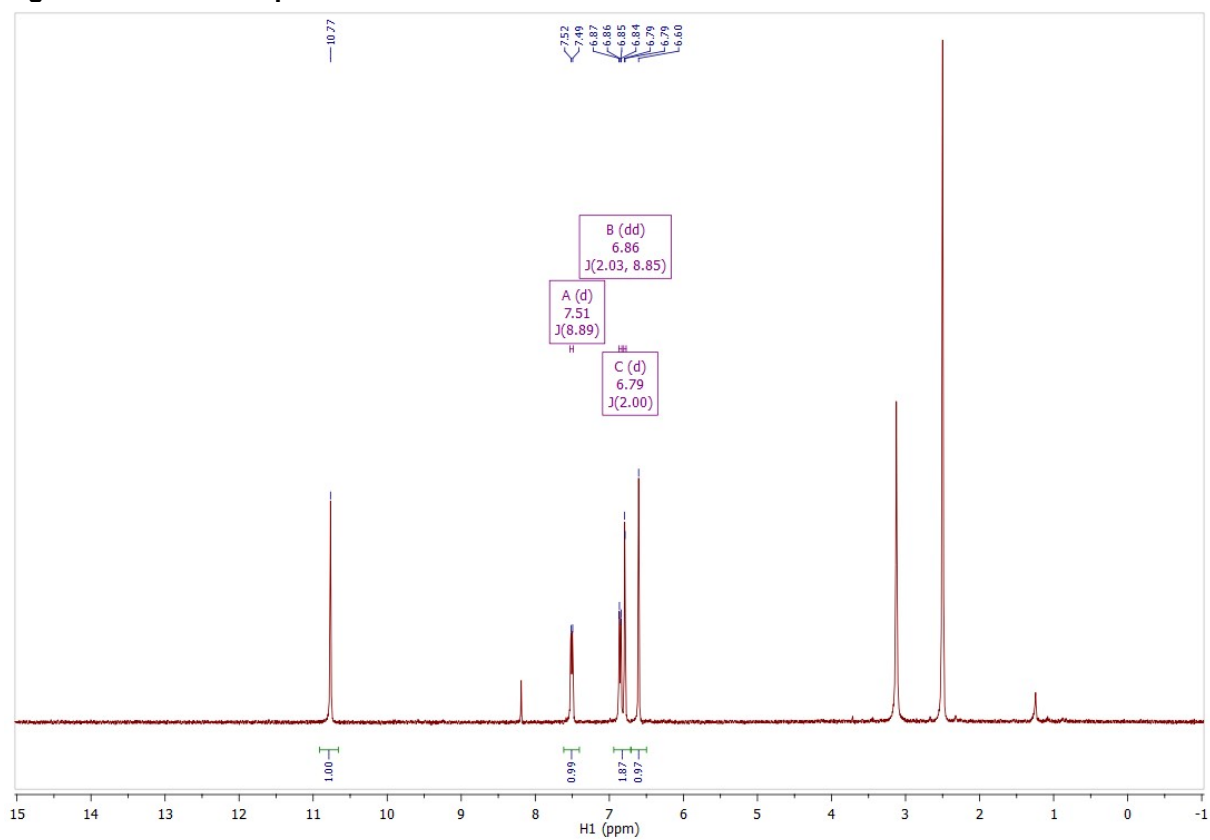

Figure S12. <sup>1</sup>H NMR spectrum of 3j

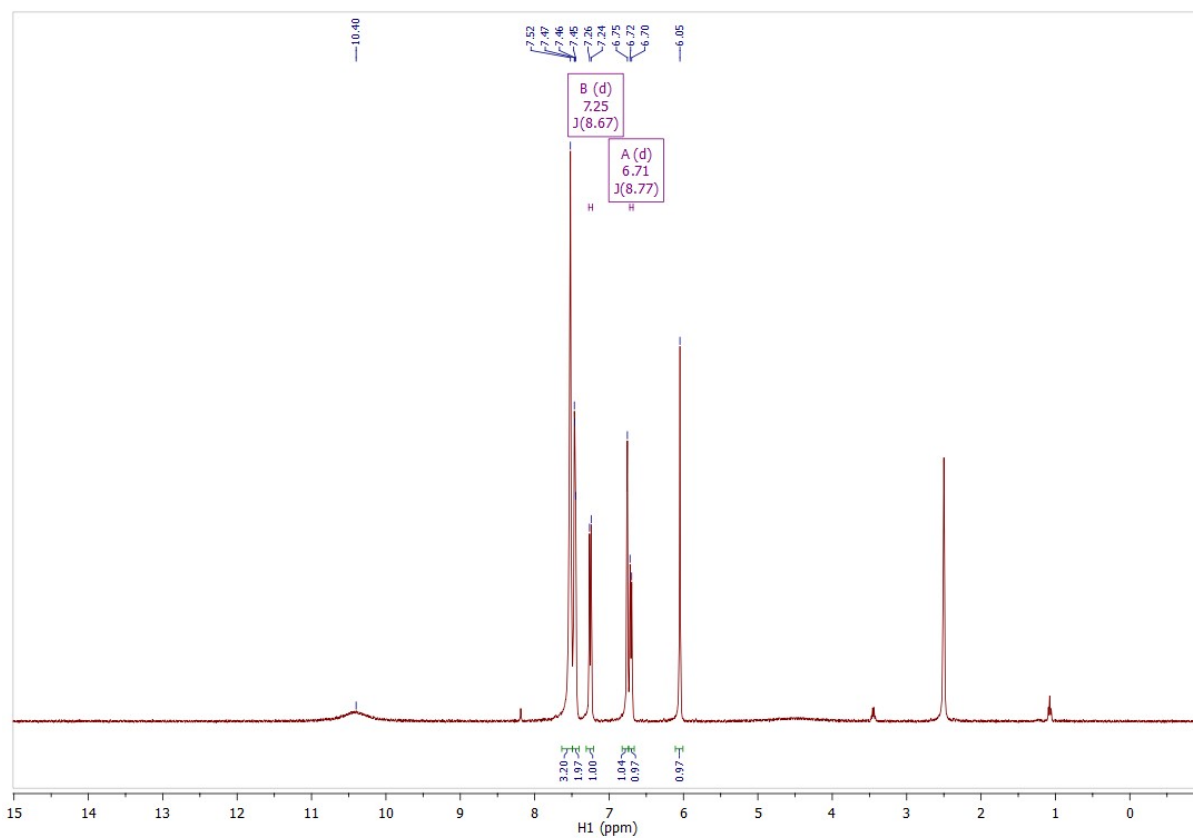

Figure S13. <sup>1</sup>H NMR spectrum of 3k

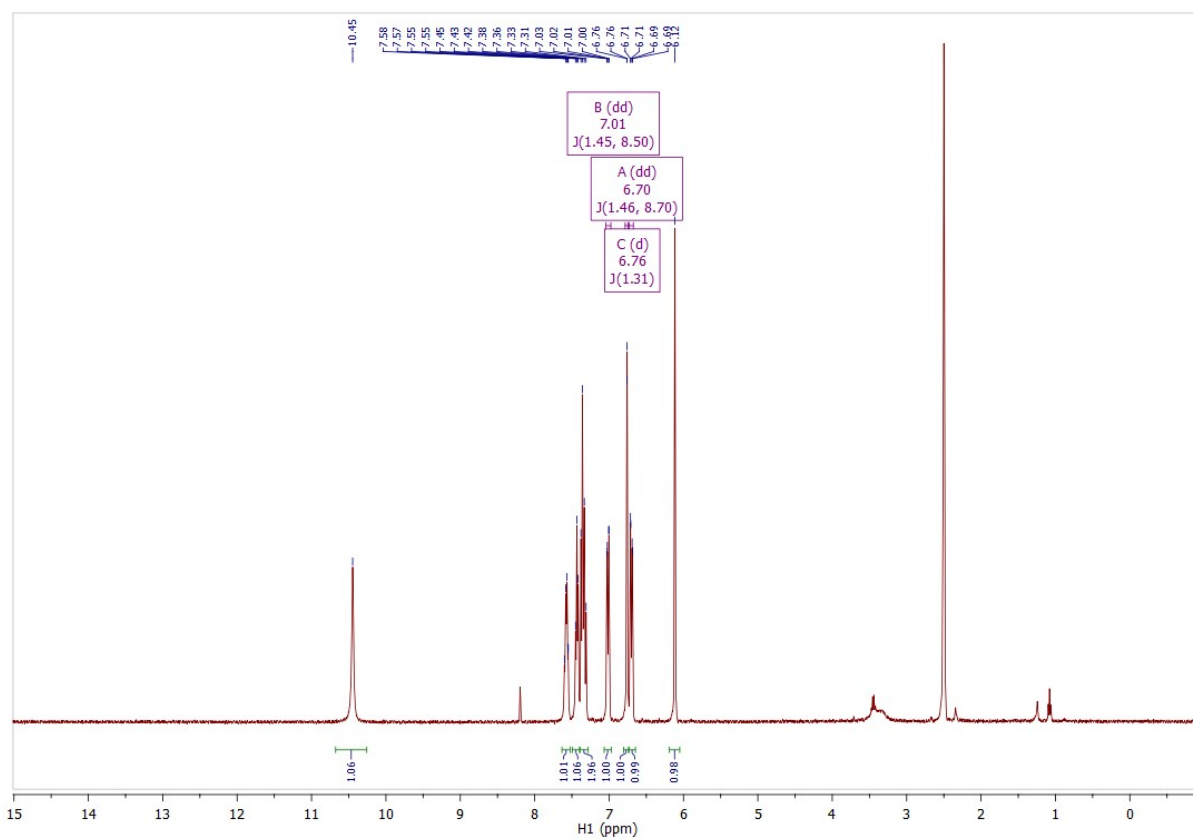

Figure S14. <sup>1</sup>H NMR spectrum of 3l

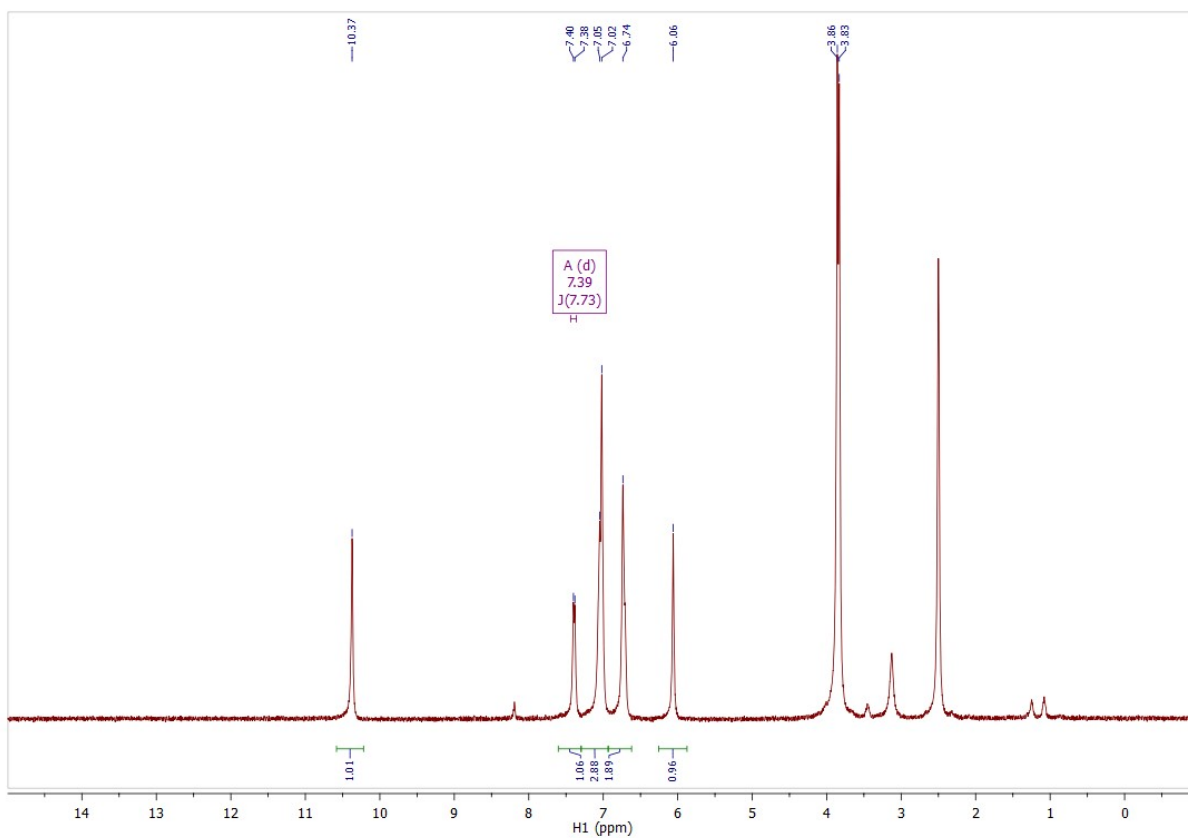

Figure S15. <sup>1</sup>H NMR spectrum of 3m

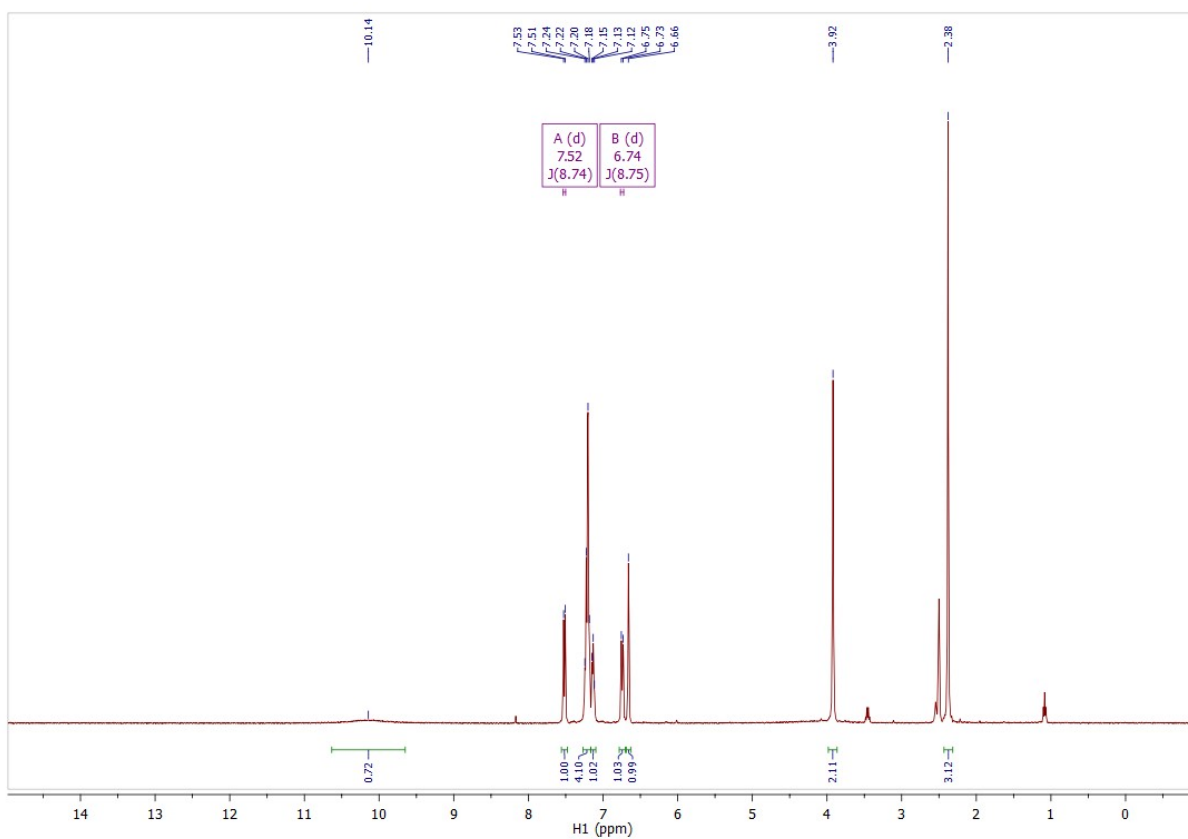

Figure S16. <sup>1</sup>H NMR spectrum of 3n

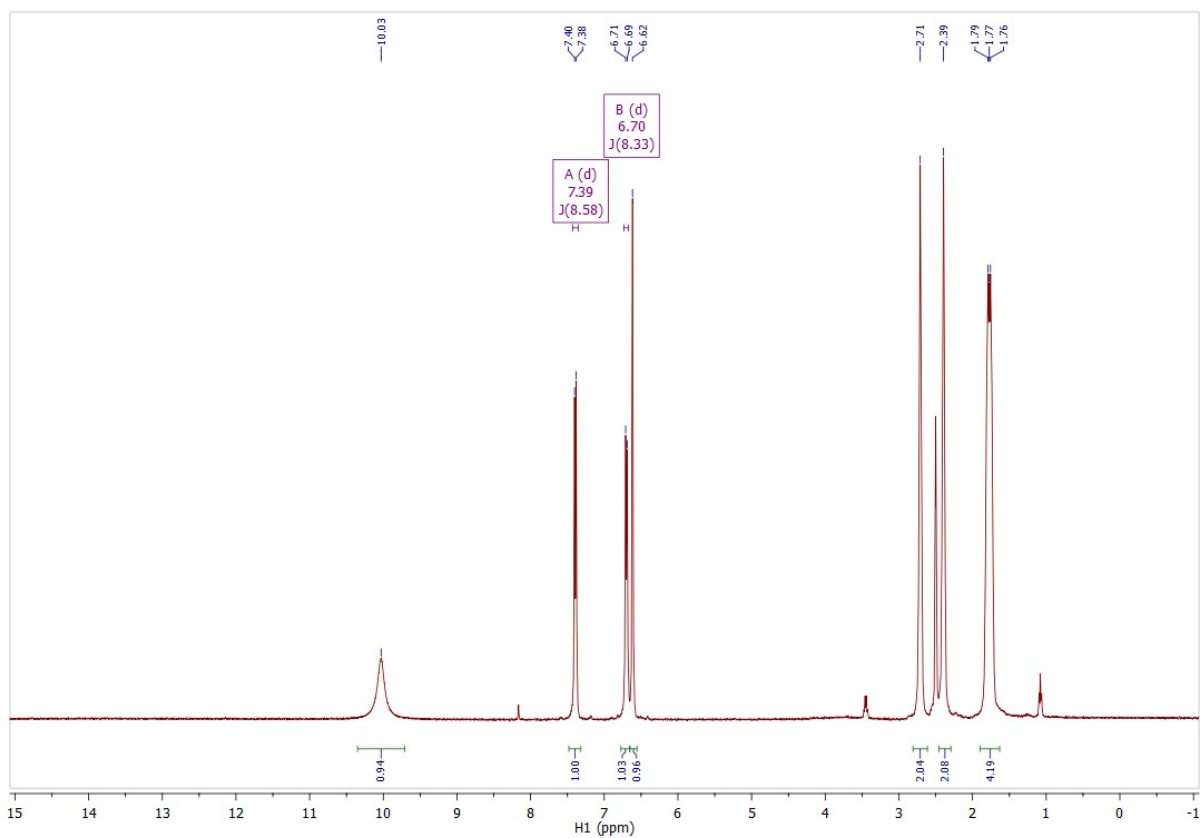

Figure S17. <sup>1</sup>H NMR spectrum of 3o

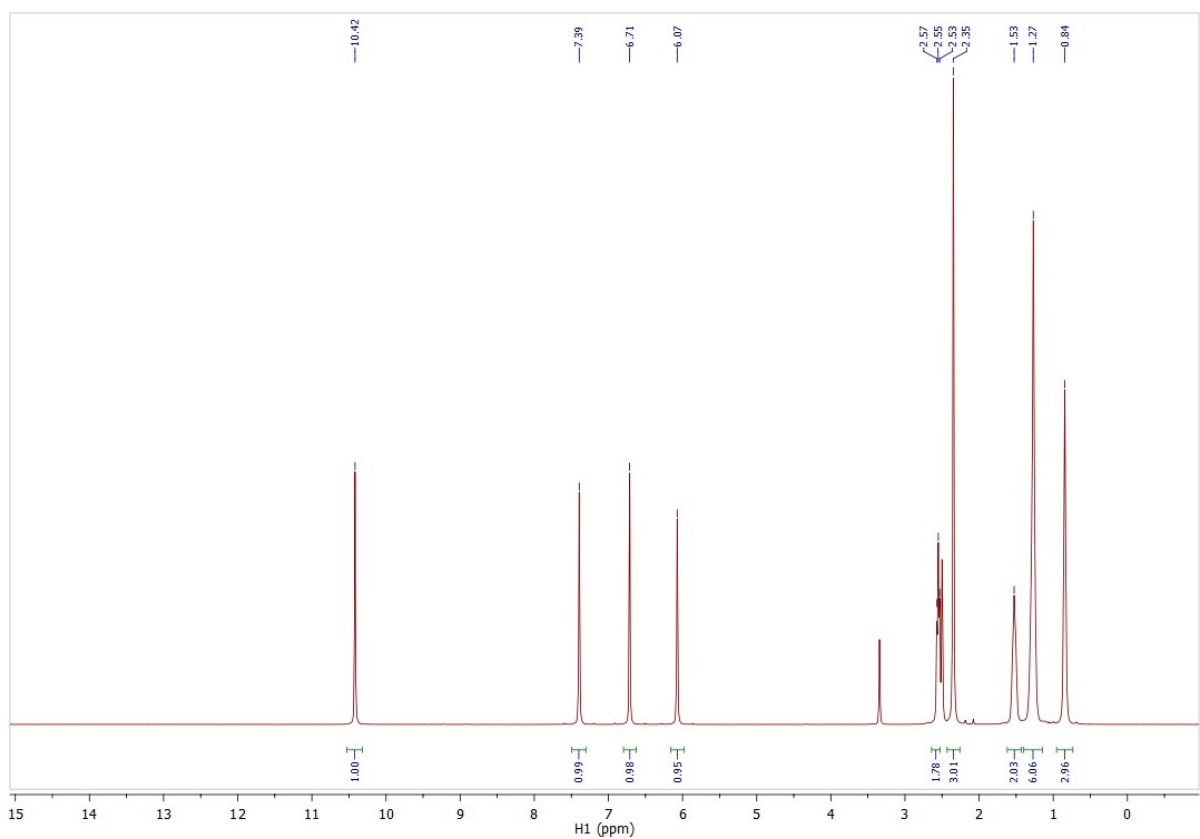

Figure S18. <sup>1</sup>H NMR spectrum of 3p

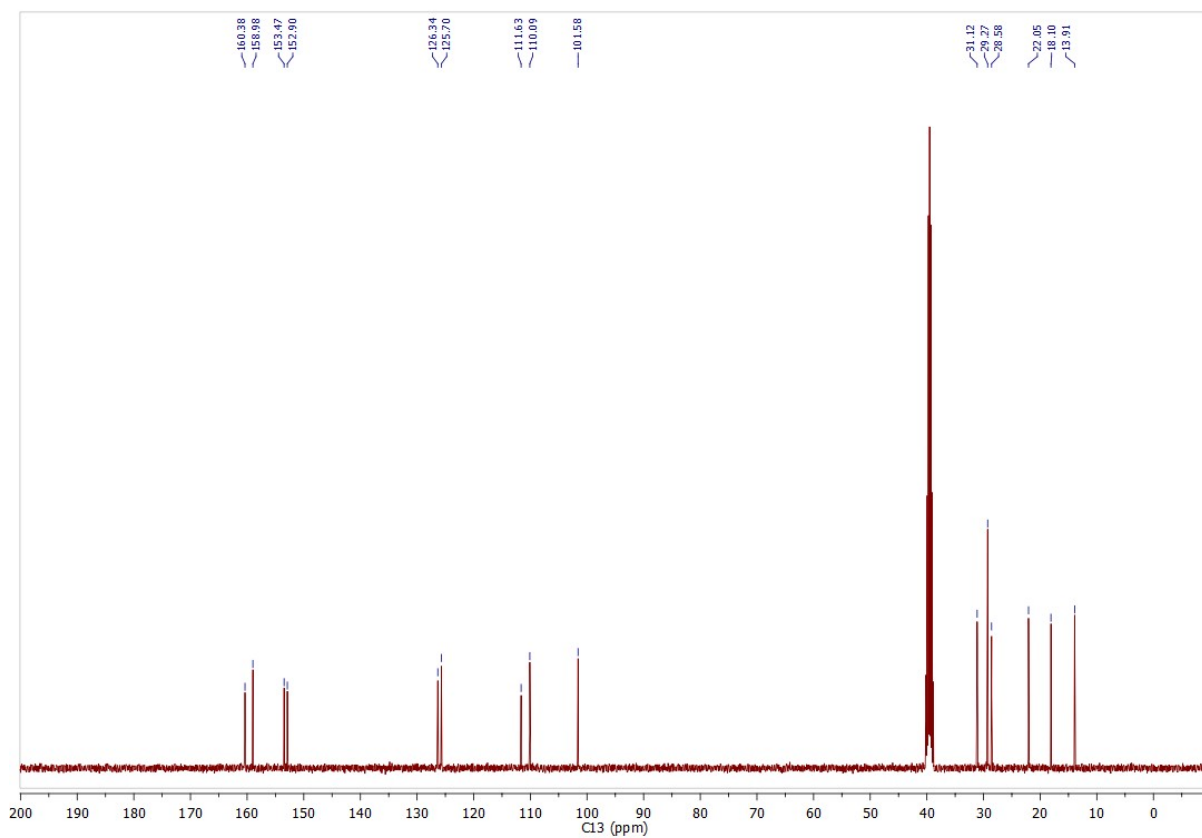

Figure S19.  $^{13}\text{C}$  NMR spectrum of 3p

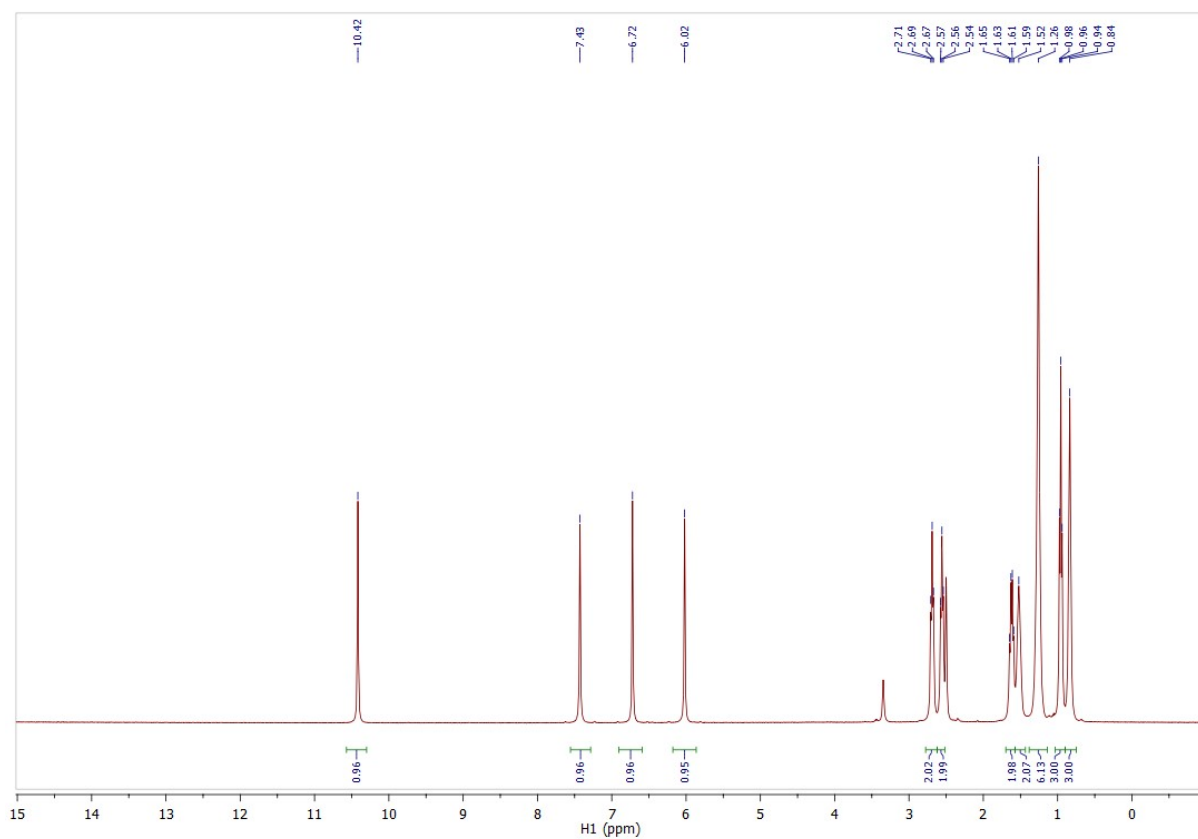

Figure S20.  $^1\text{H}$  NMR spectrum of 3q



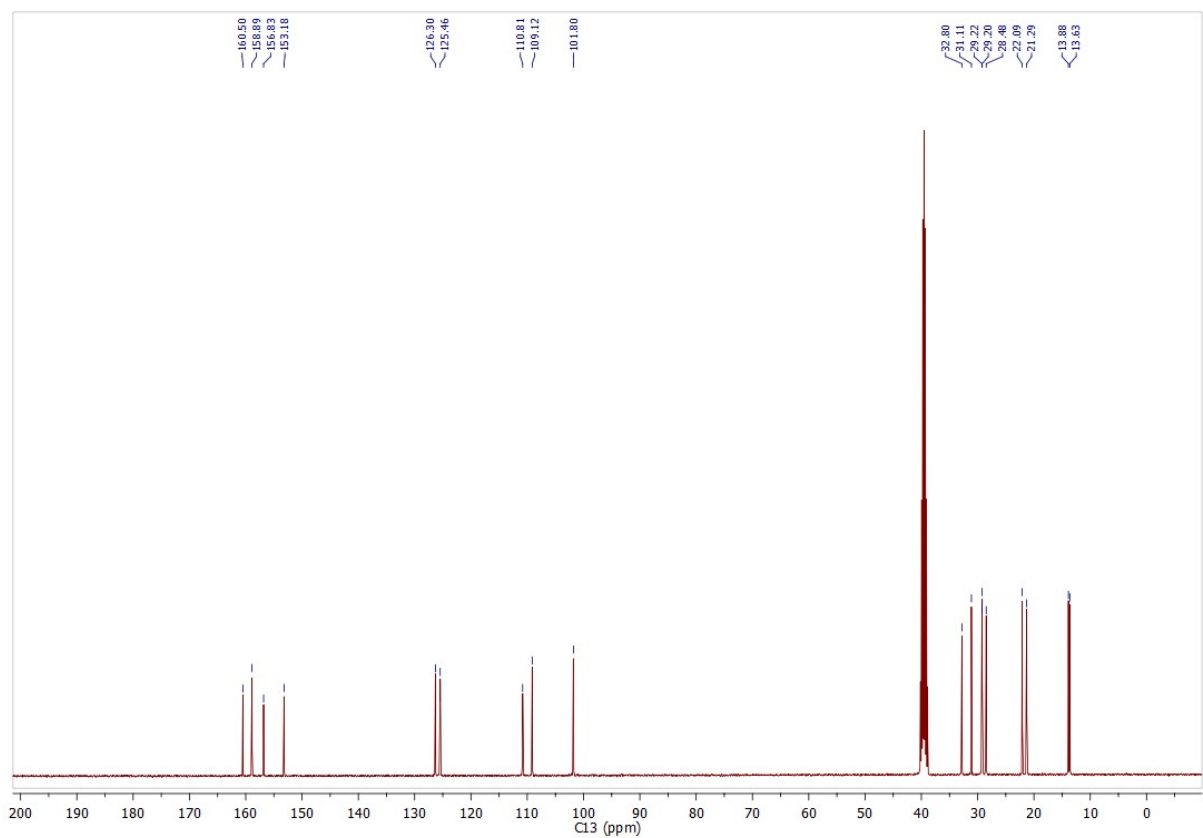

Figure S21.  $^{13}\text{C}$  NMR spectrum of **3q**

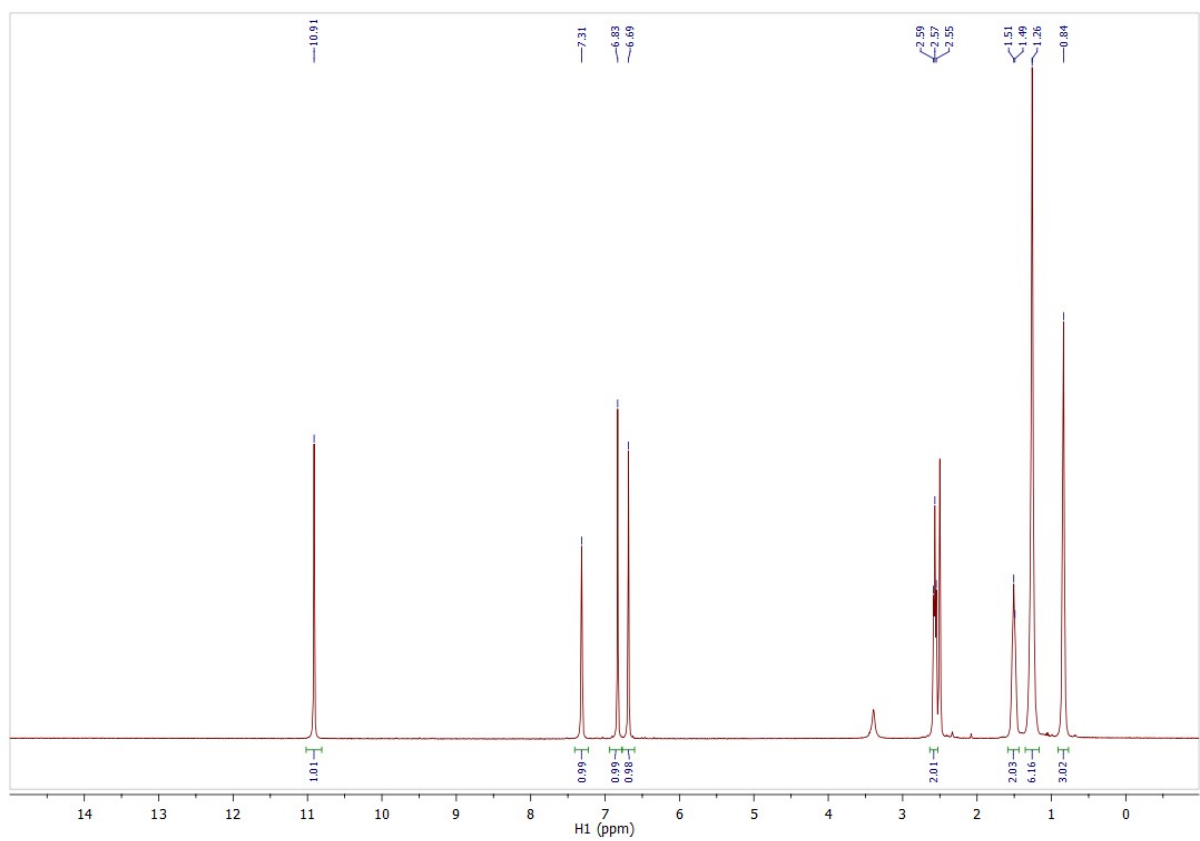

Figure S22.  $^1\text{H}$  NMR spectrum of **3r**

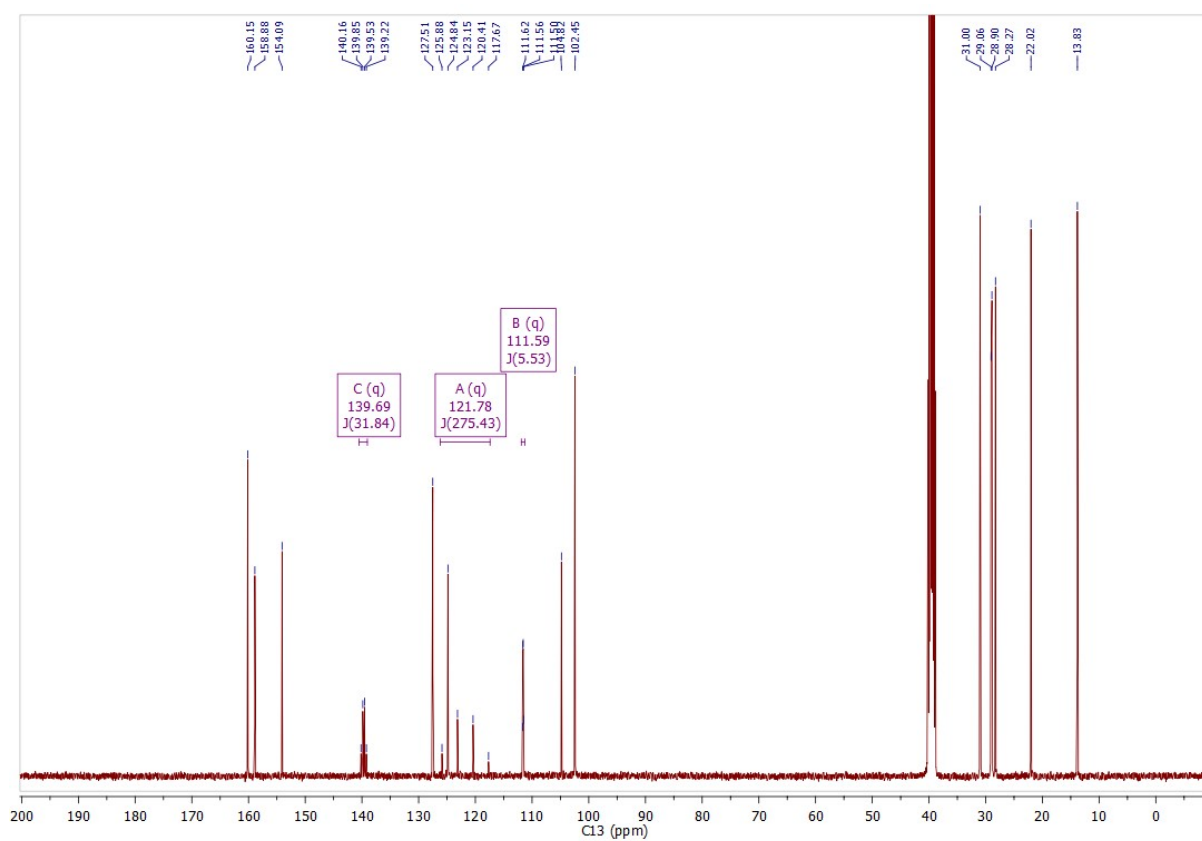

Figure S23. <sup>13</sup>C NMR spectrum of 3r

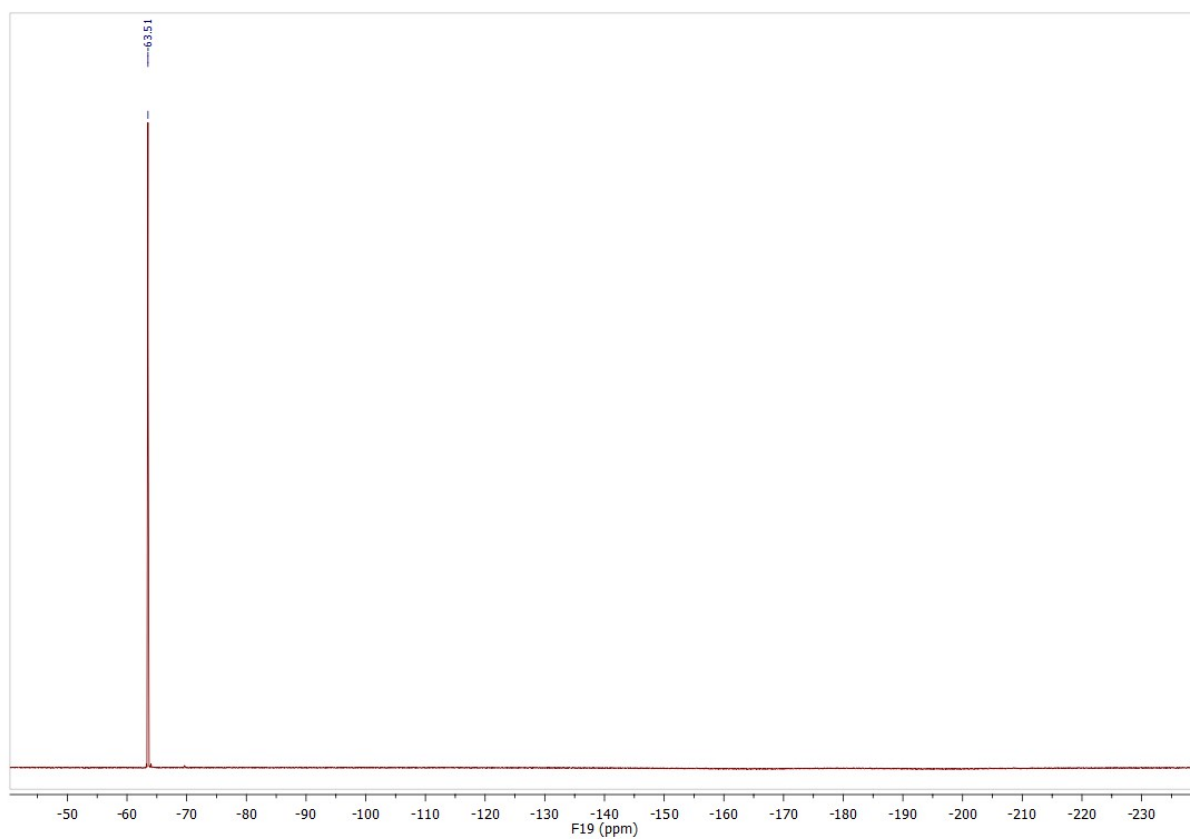

Figure S24. <sup>19</sup>F NMR spectrum of 3r

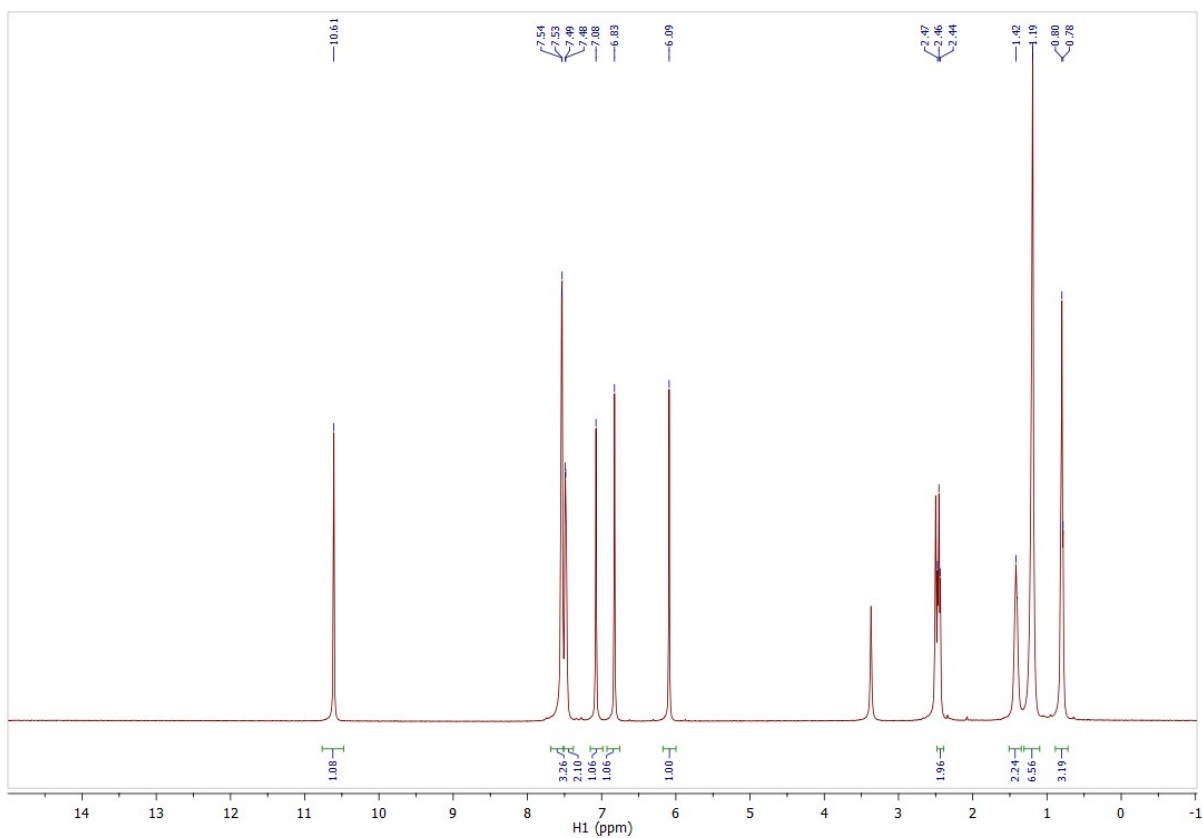

Figure S25. <sup>1</sup>H NMR spectrum of 3s

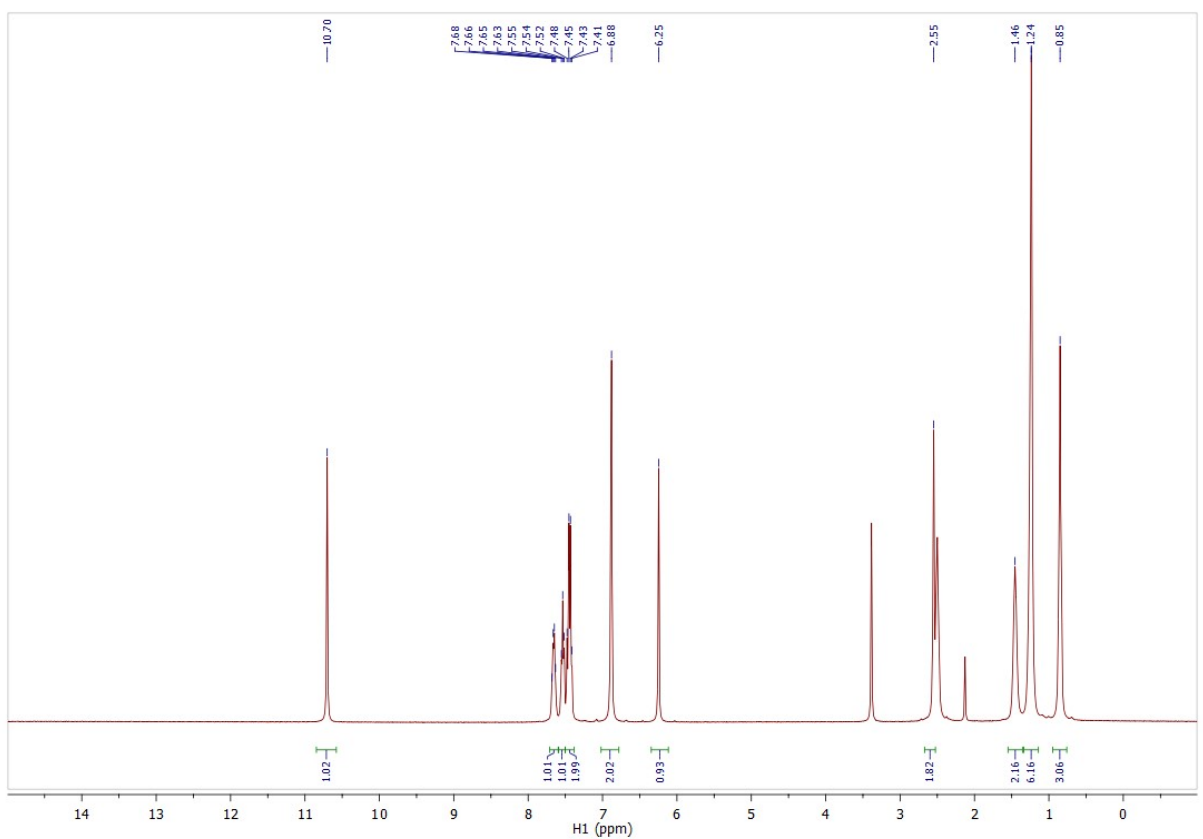

Figure S26. <sup>1</sup>H NMR spectrum of 3t

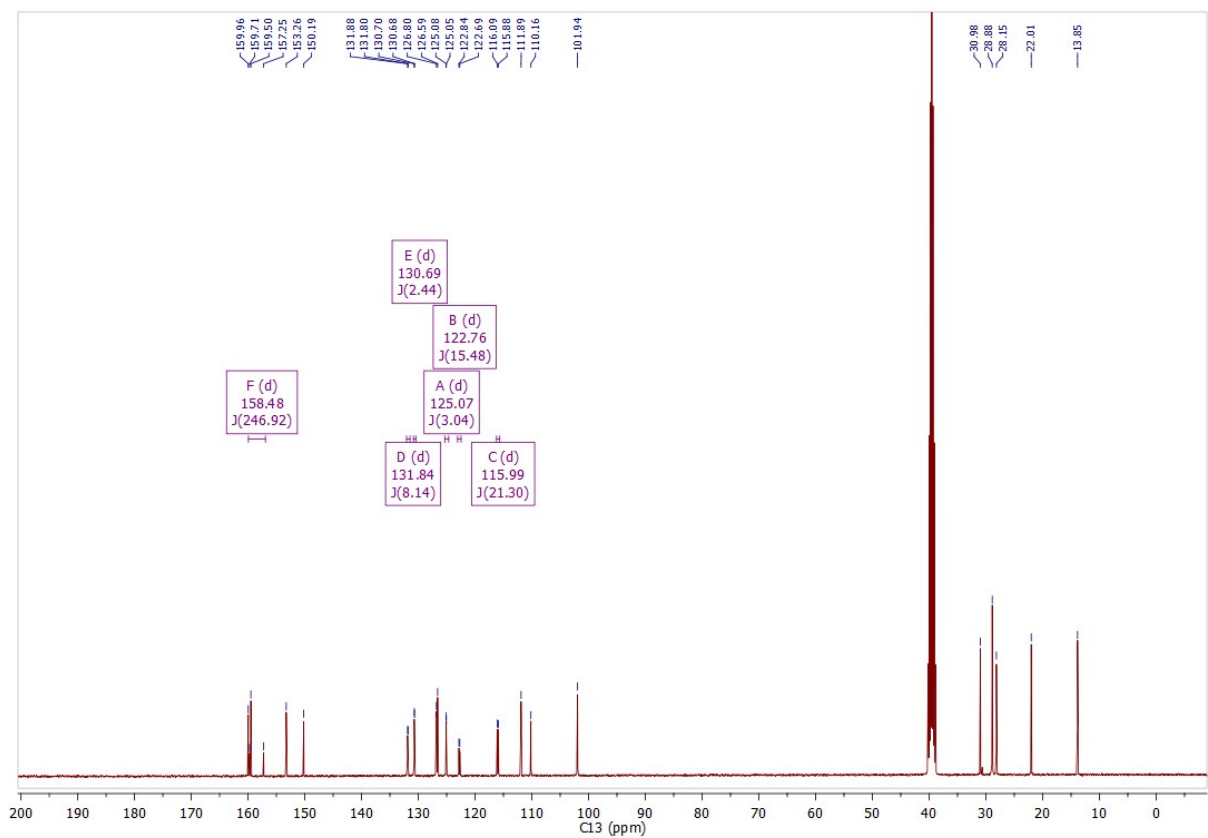

Figure S27. <sup>13</sup>C NMR spectrum of 3t

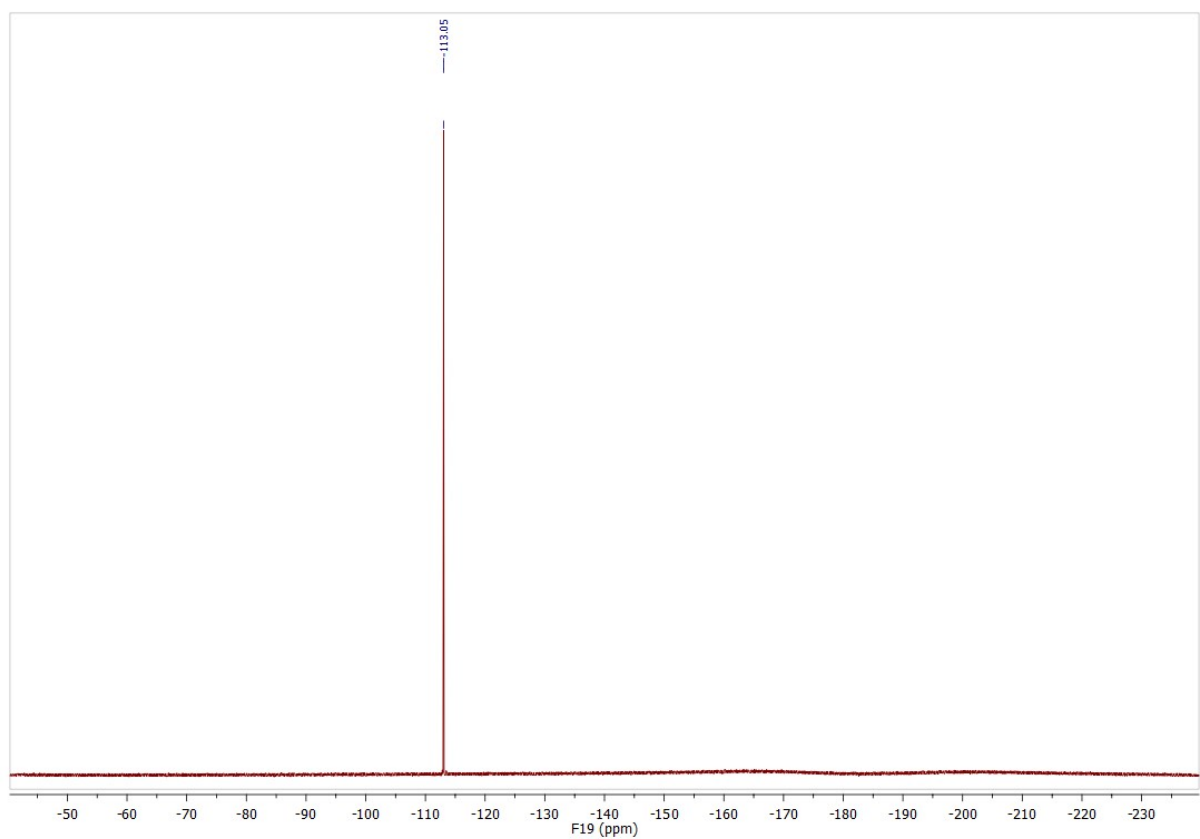

Figure S28. <sup>19</sup>F NMR spectrum of 3t

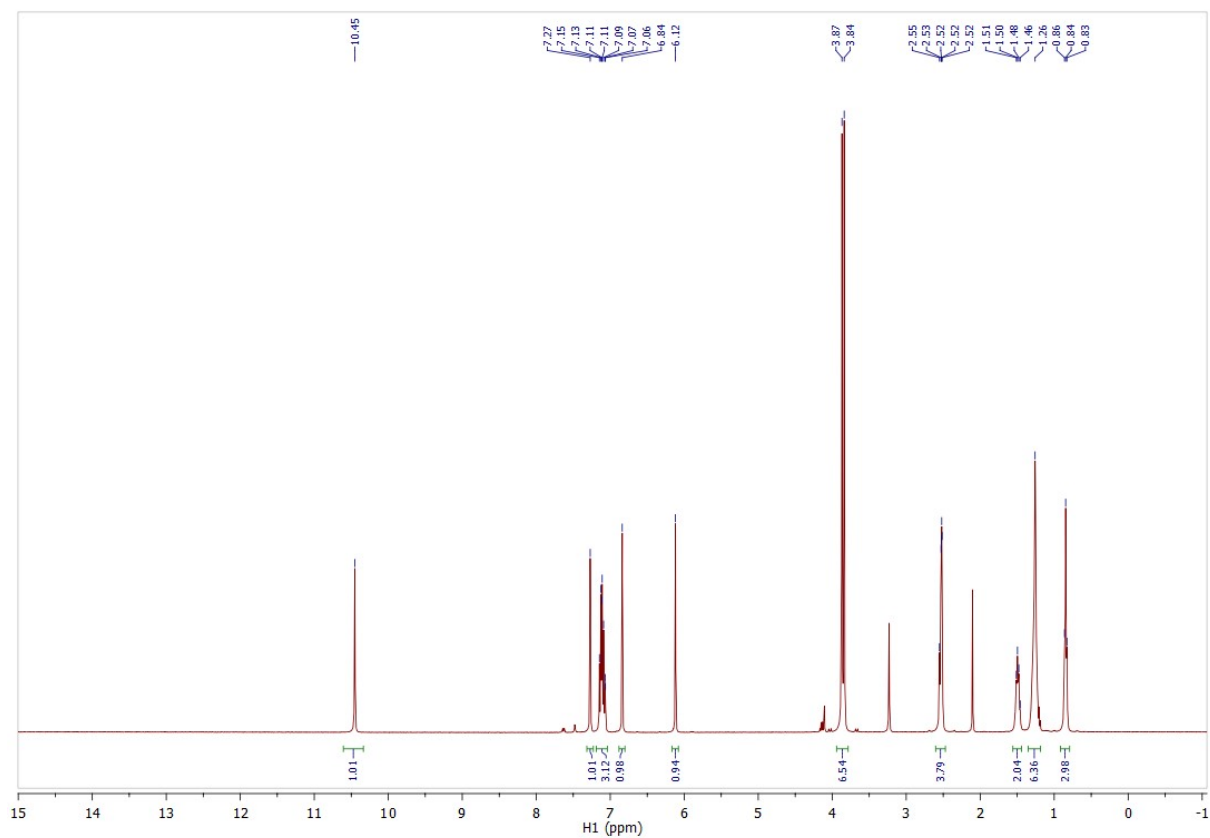

Figure S29.  $^1\text{H}$  NMR spectrum of 3u

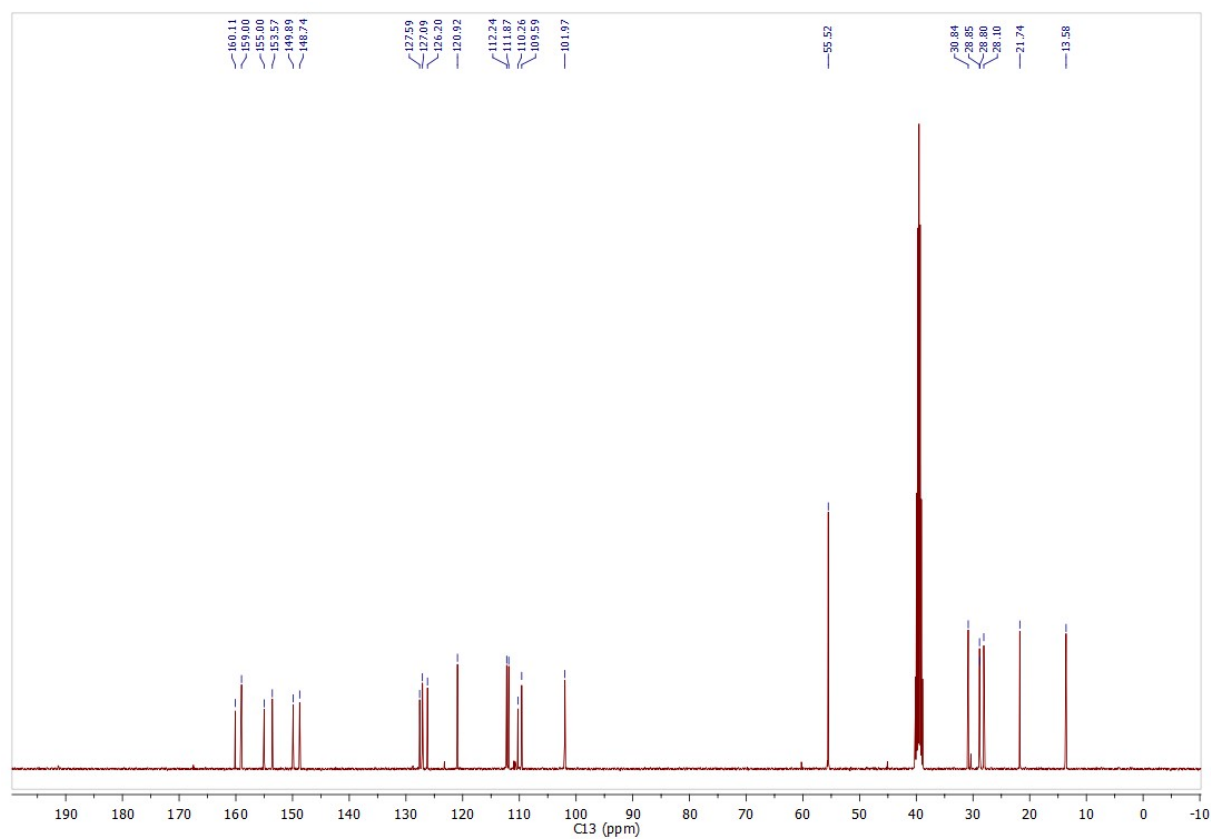

Figure S30.  $^{13}\text{C}$  NMR spectrum of 3u

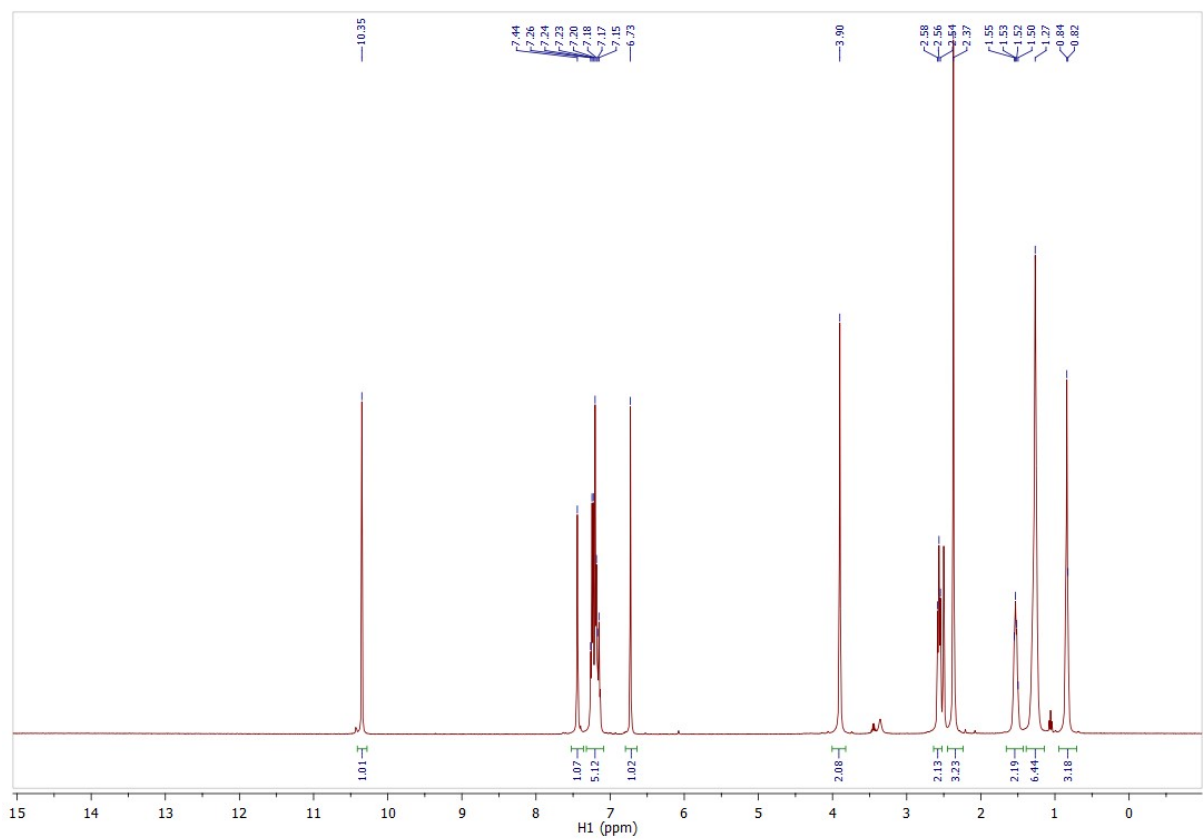

Figure S31. <sup>1</sup>H NMR spectrum of 3v

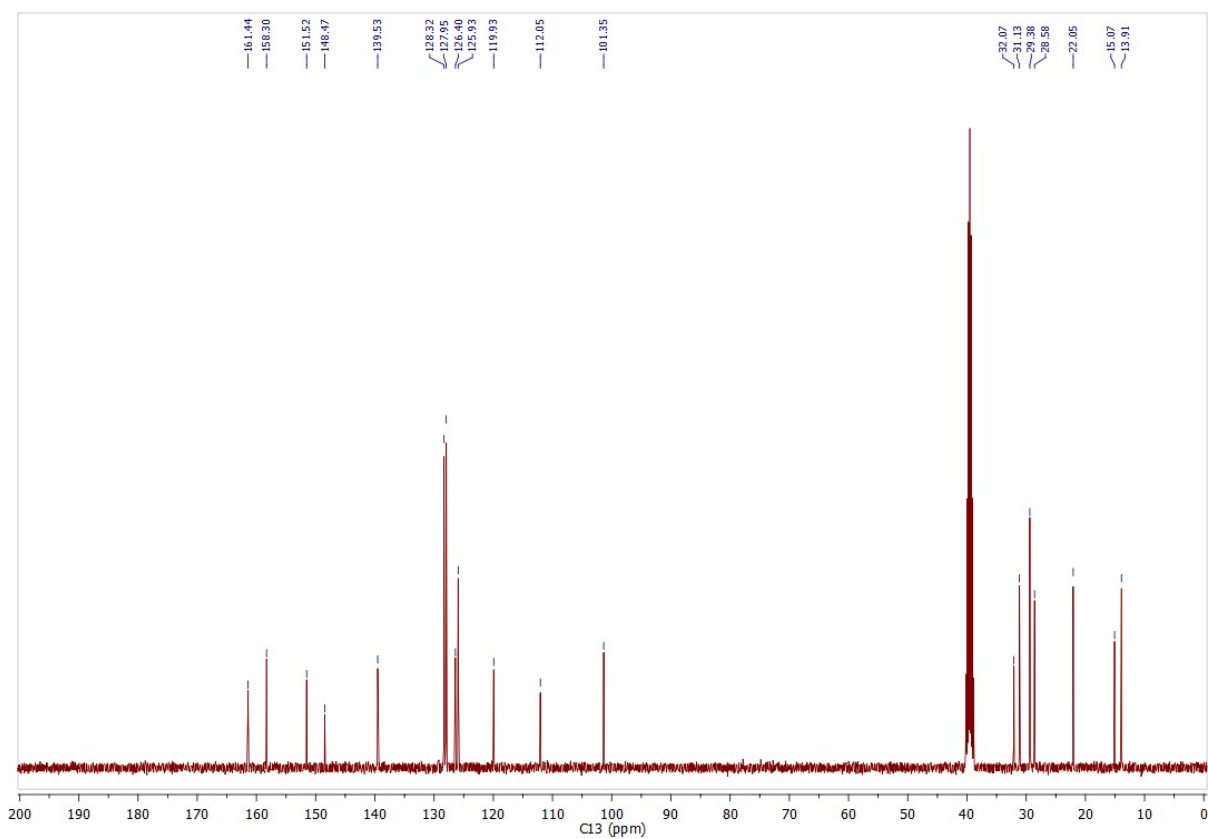

Figure S32. <sup>13</sup>C NMR spectrum of 3v

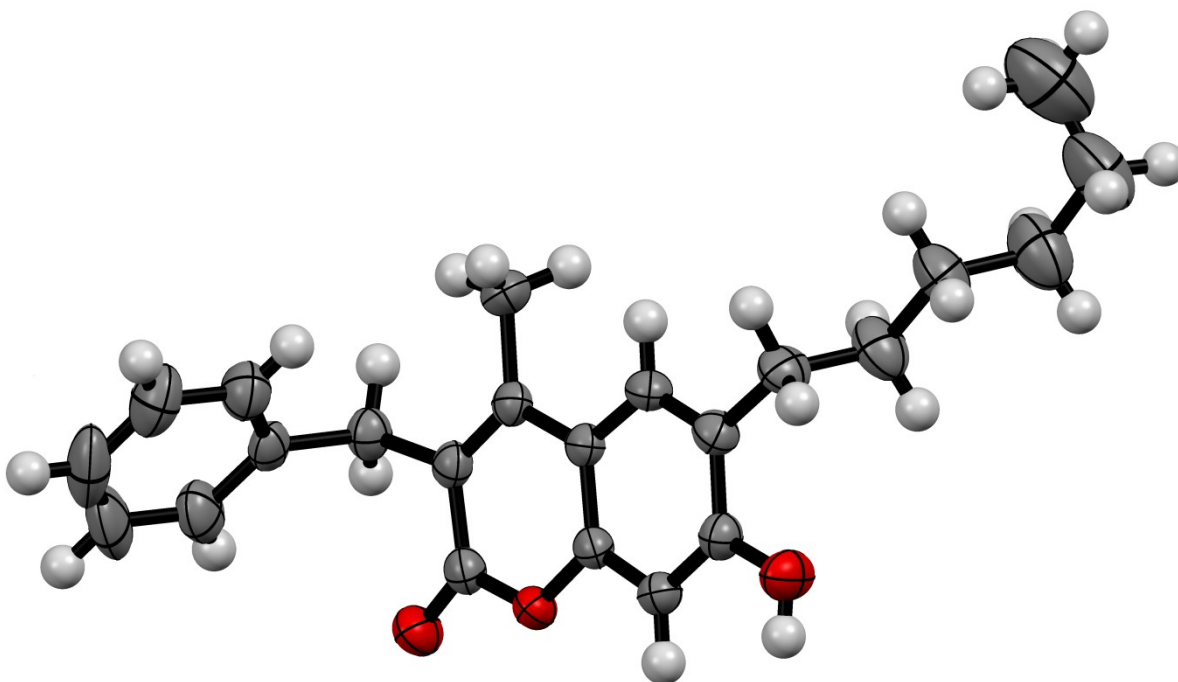

**Figure S33.** Thermal ellipsoid plot of compound **3v**; ellipsoid contour at the 30% probability level. carbon (gray), hydrogen (light gray), and oxygen (red). Single crystal was grown by the slow evaporation of the solution of compound **2v** in EtOAc.

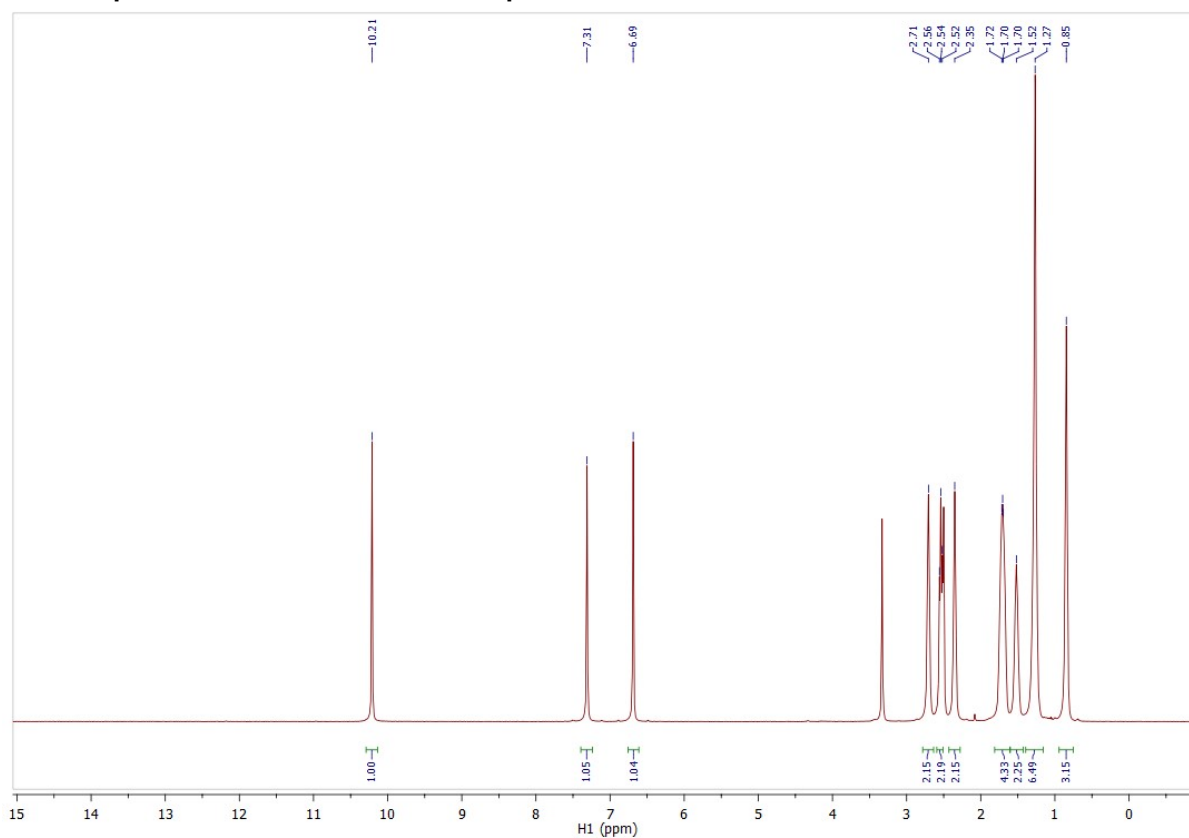

**Figure S34.**  $^1\text{H}$  NMR spectrum of **3w**

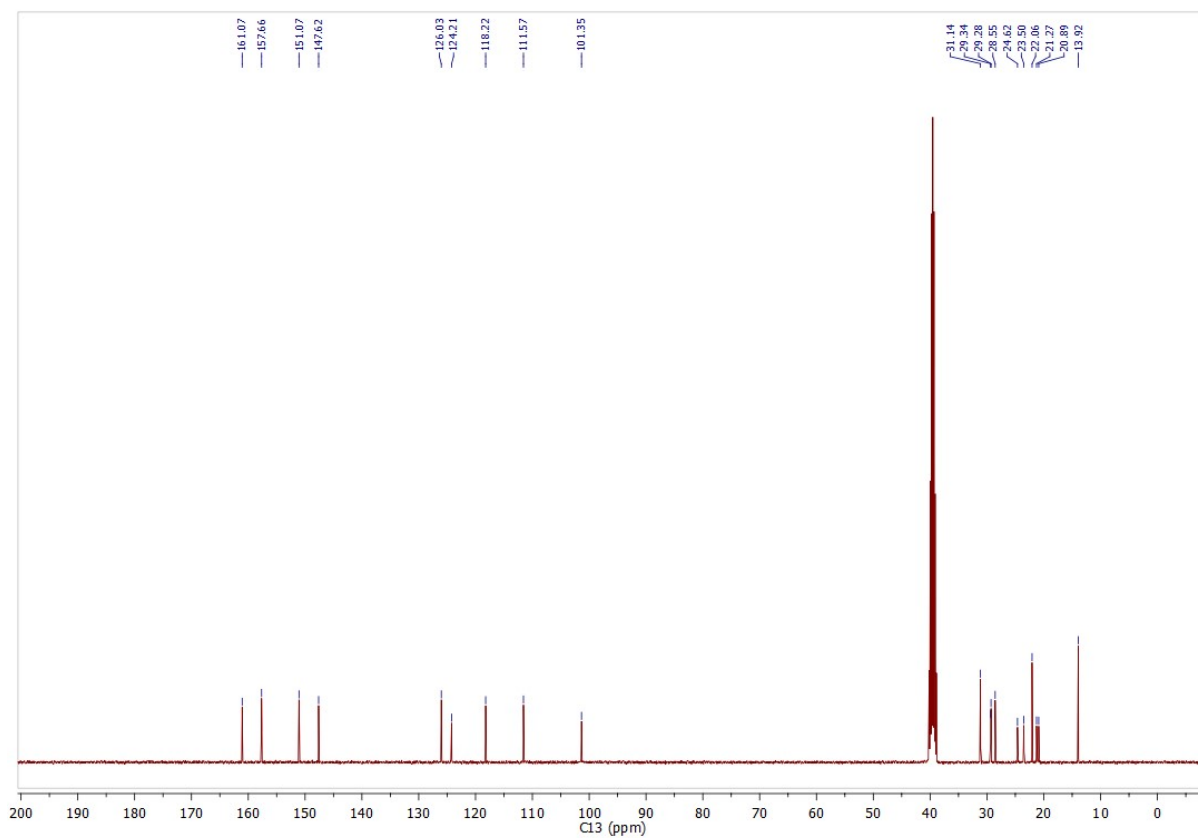

Figure S35.  $^{13}\text{C}$  NMR spectrum of 3w

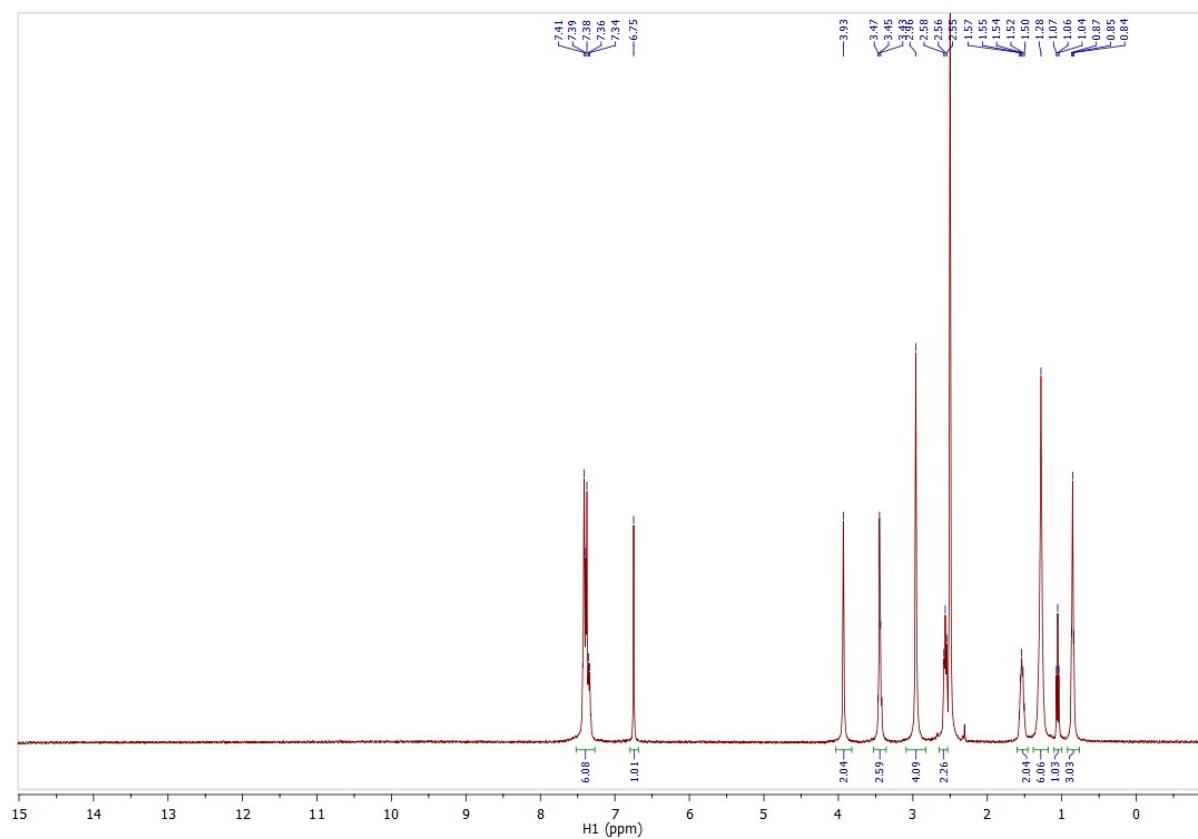

Figure S36.  $^1\text{H}$  NMR spectrum of 3x



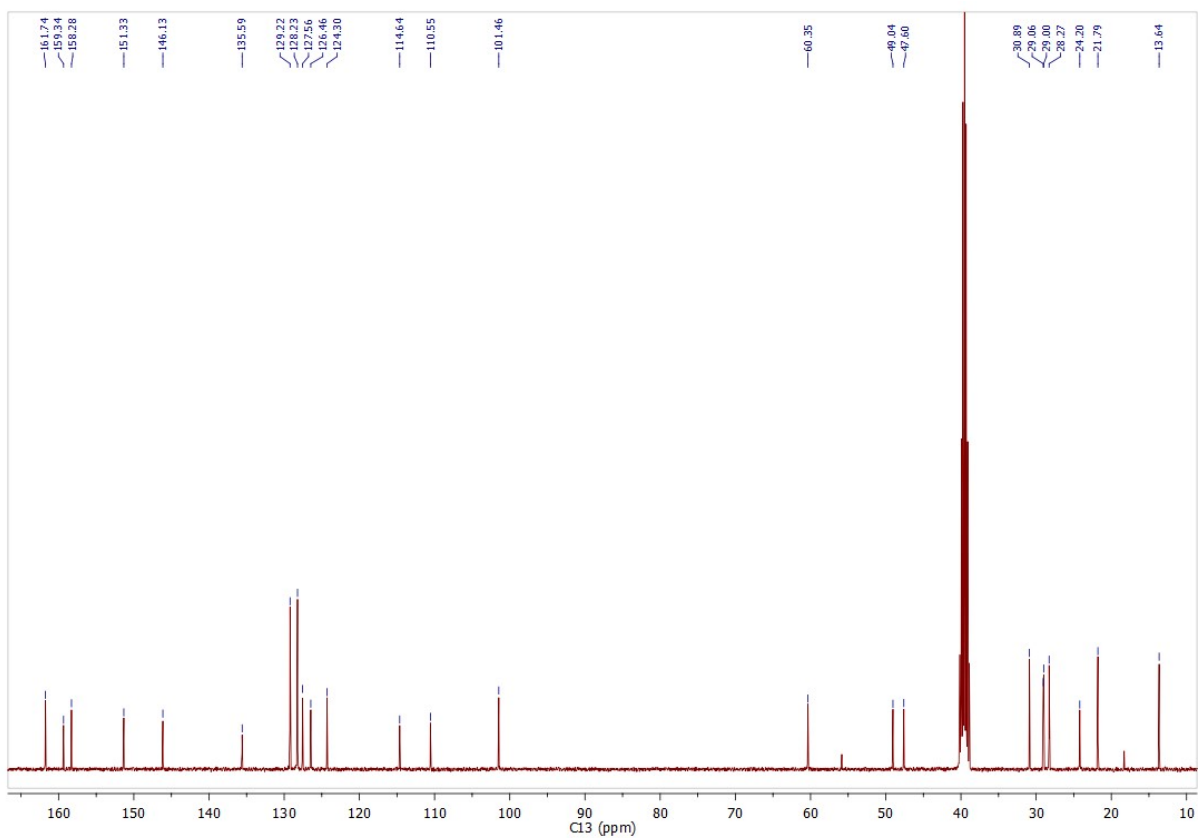

Figure S37.  $^{13}\text{C}$  NMR spectrum of 3x

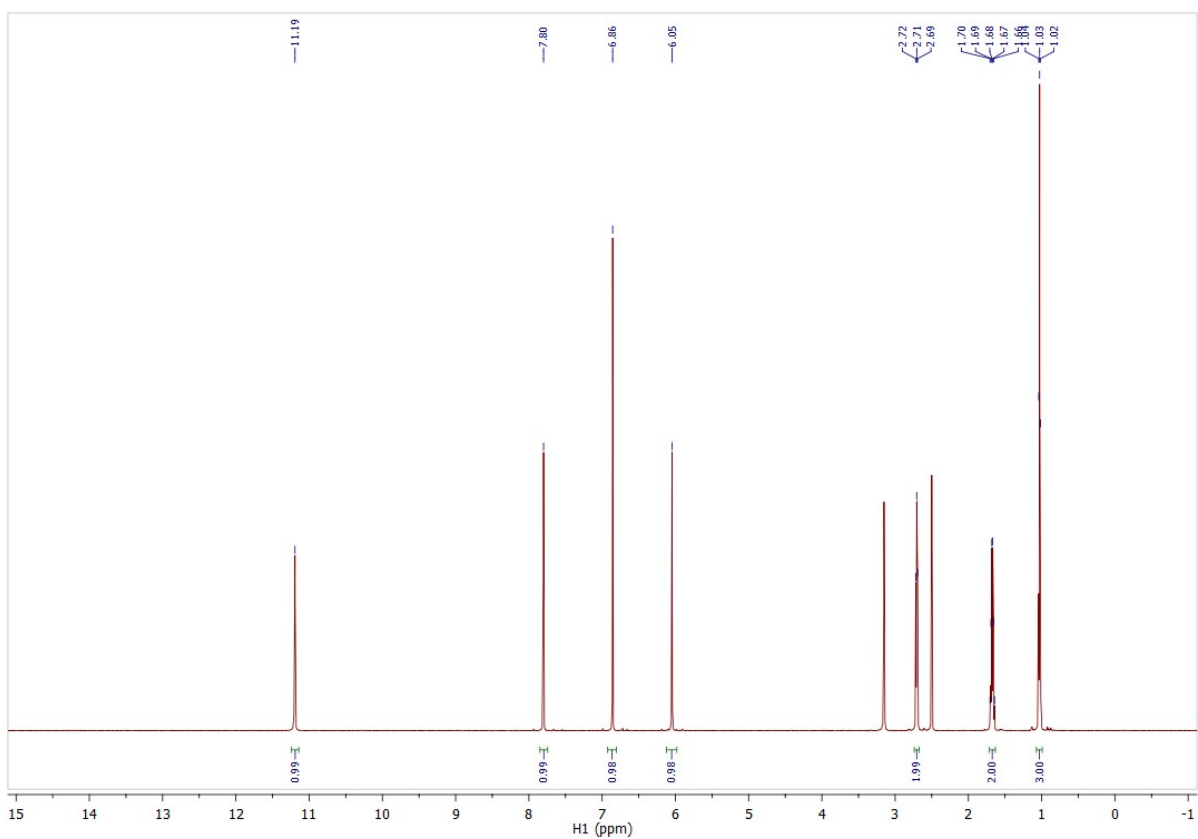

Figure S38.  $^1\text{H}$  NMR spectrum of 3y

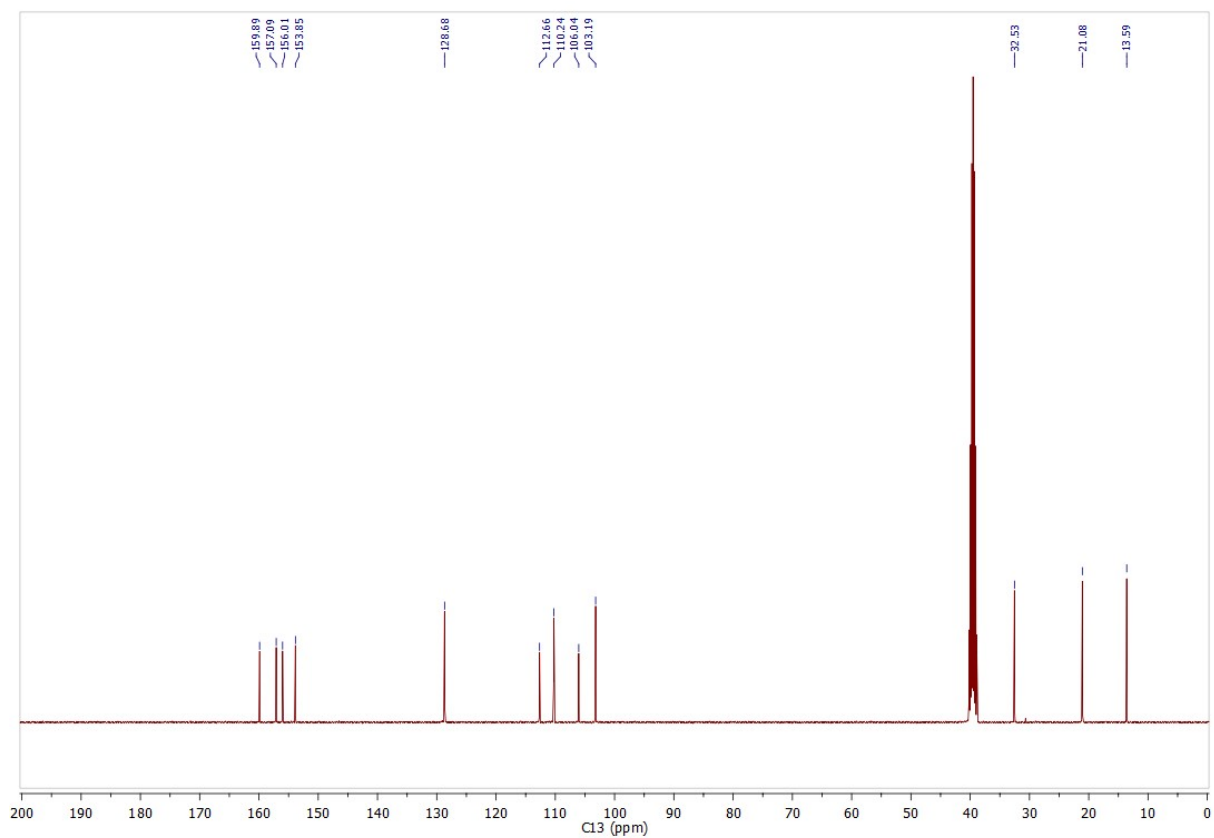

Figure S39.  $^{13}\text{C}$  NMR spectrum of **3y**

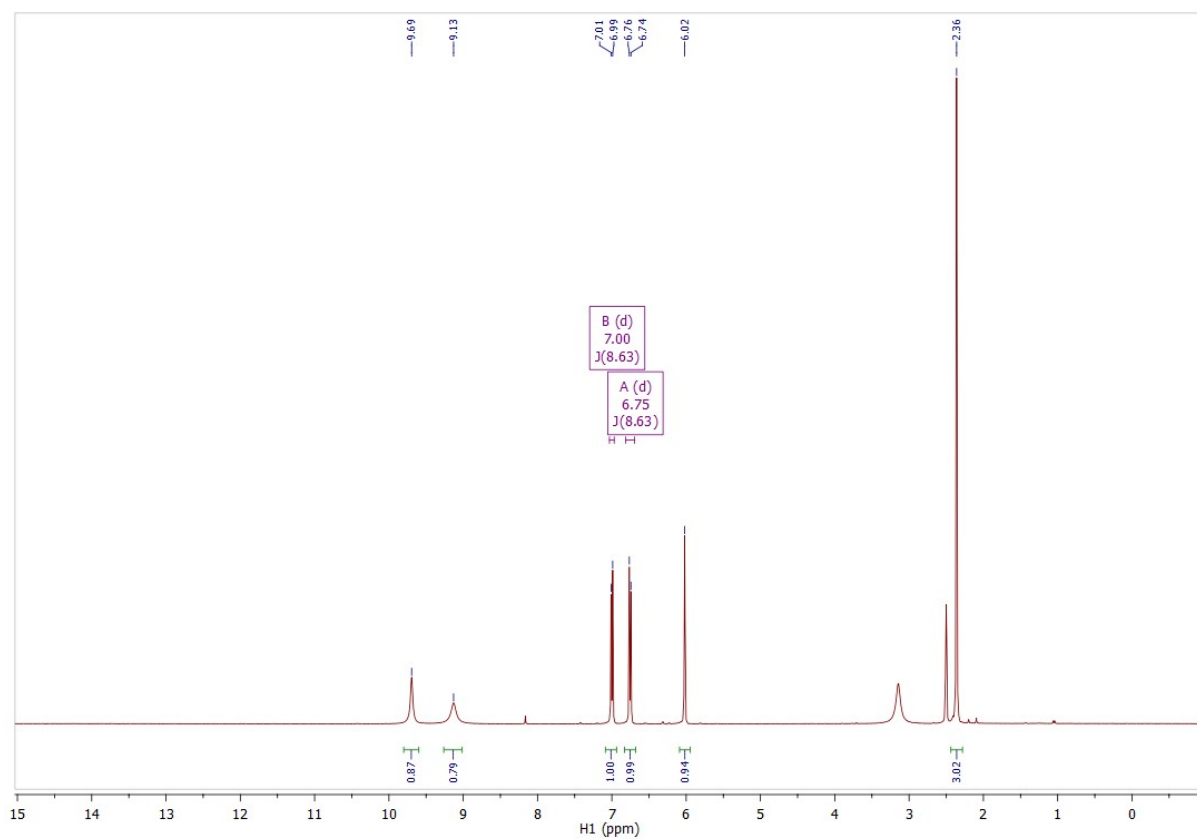

Figure S40.  $^1\text{H}$  NMR spectrum of **3z**

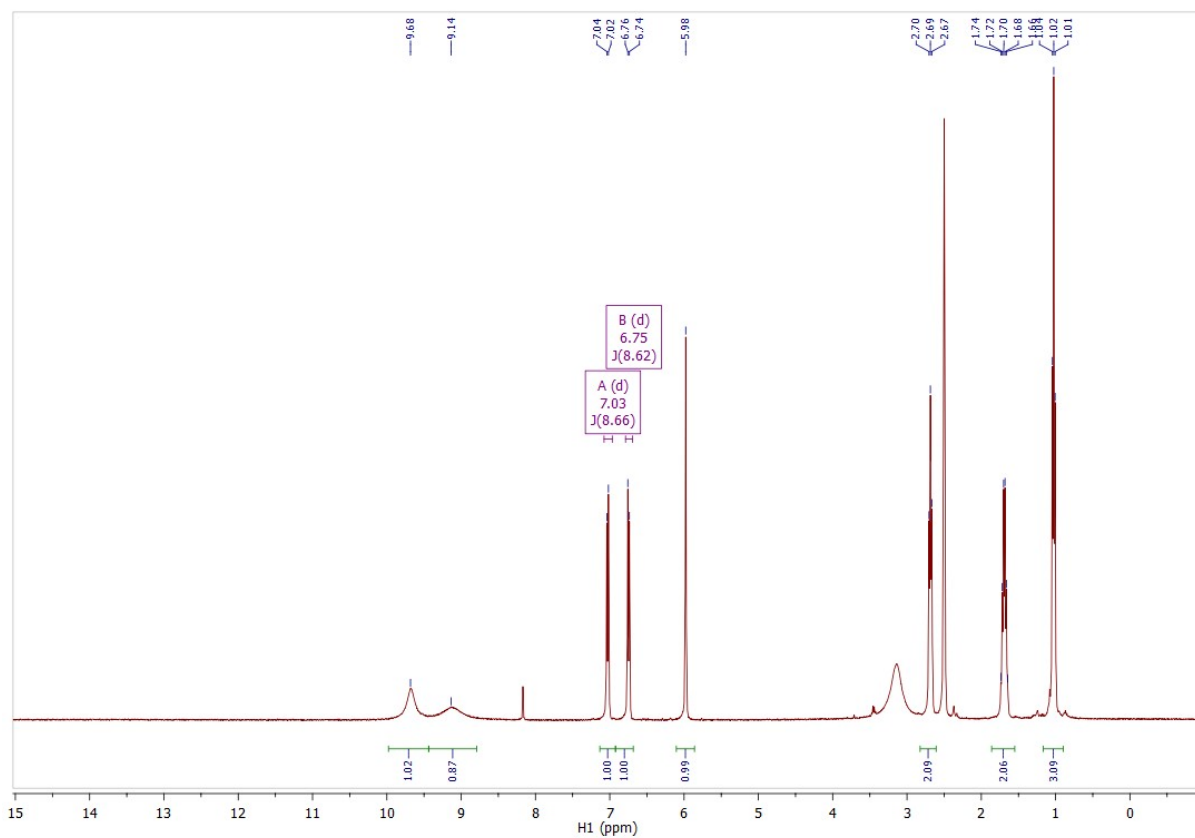

Figure S41. <sup>1</sup>H NMR spectrum of 3aa

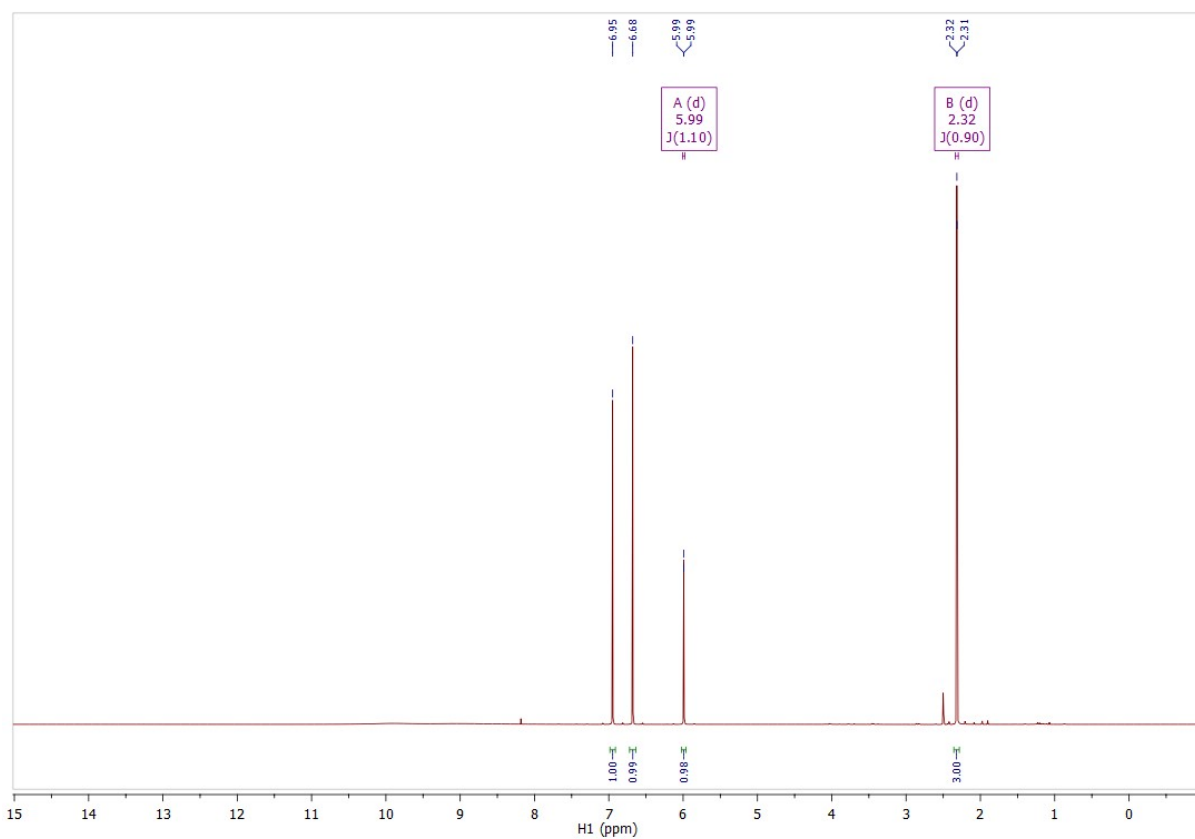

Figure S42. <sup>1</sup>H NMR spectrum of 3ab

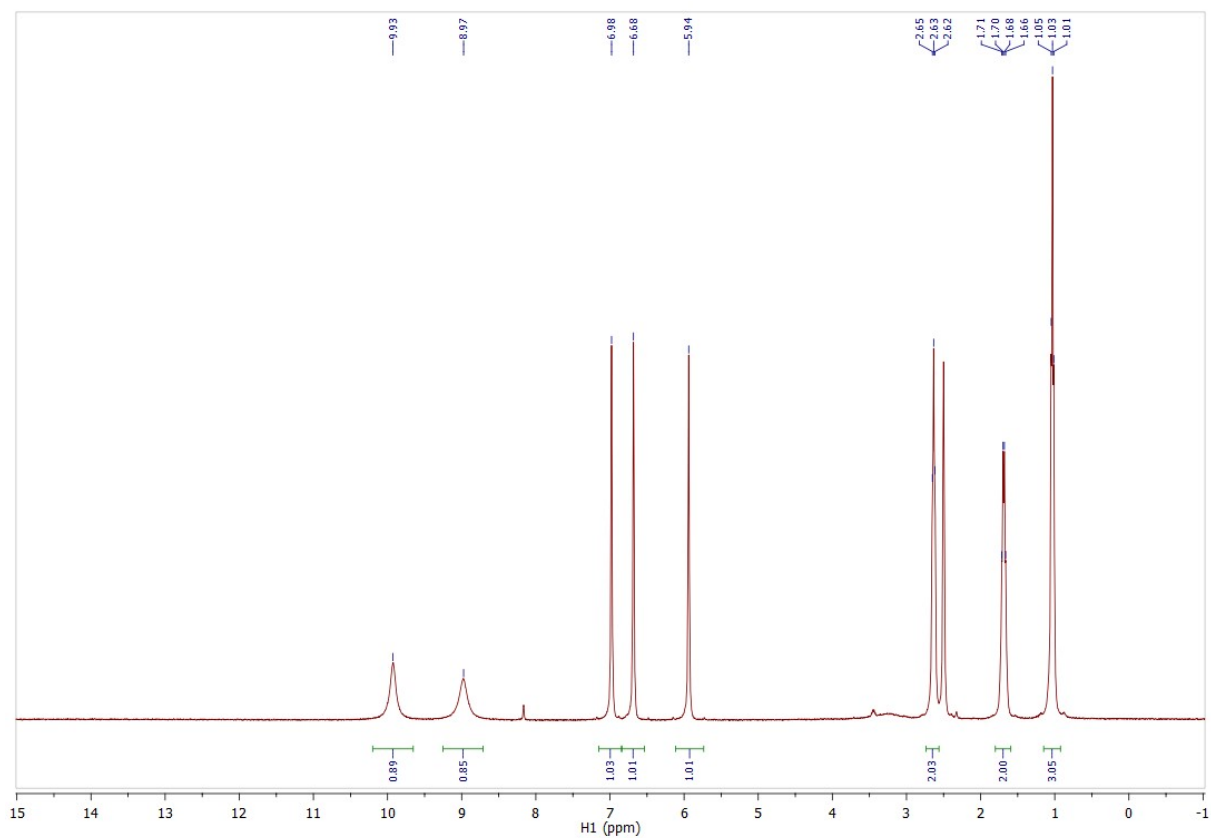

Figure S43. <sup>1</sup>H NMR spectrum of 3ac

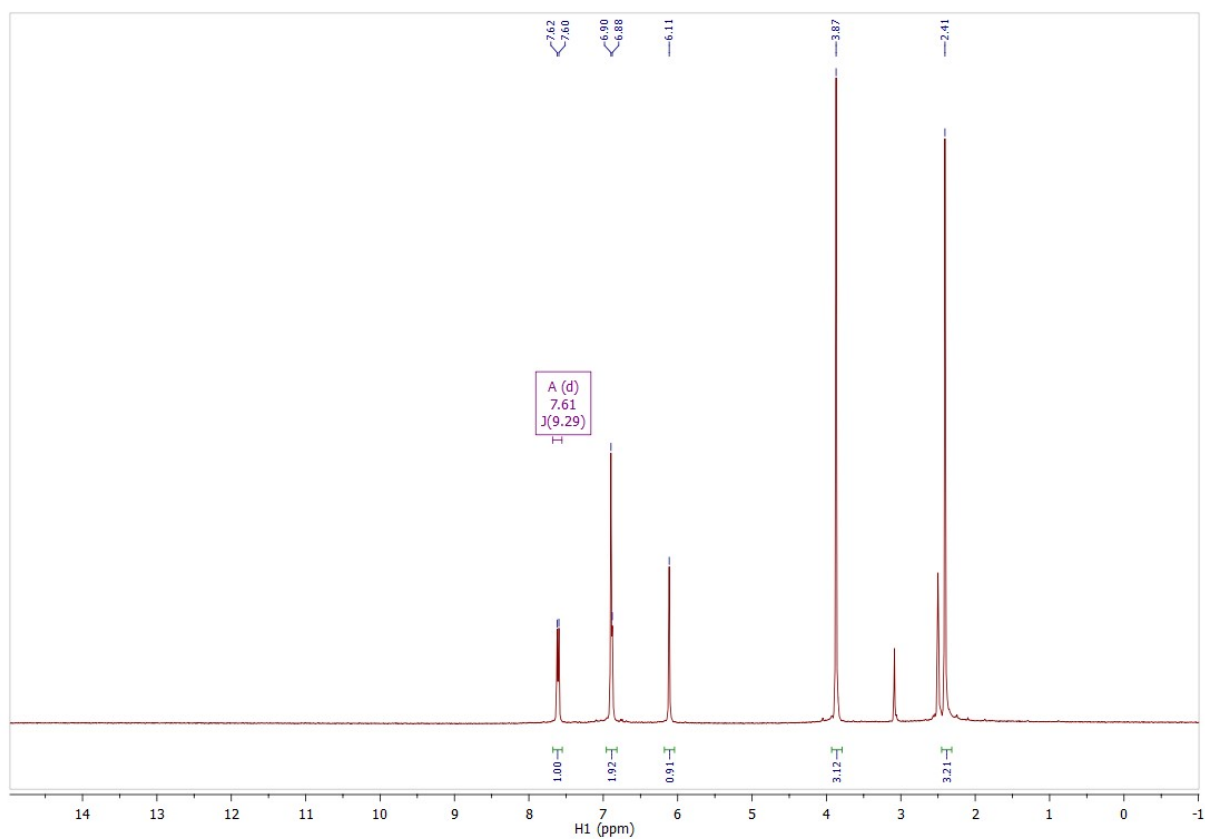

Figure S44. <sup>1</sup>H NMR spectrum of 3ad

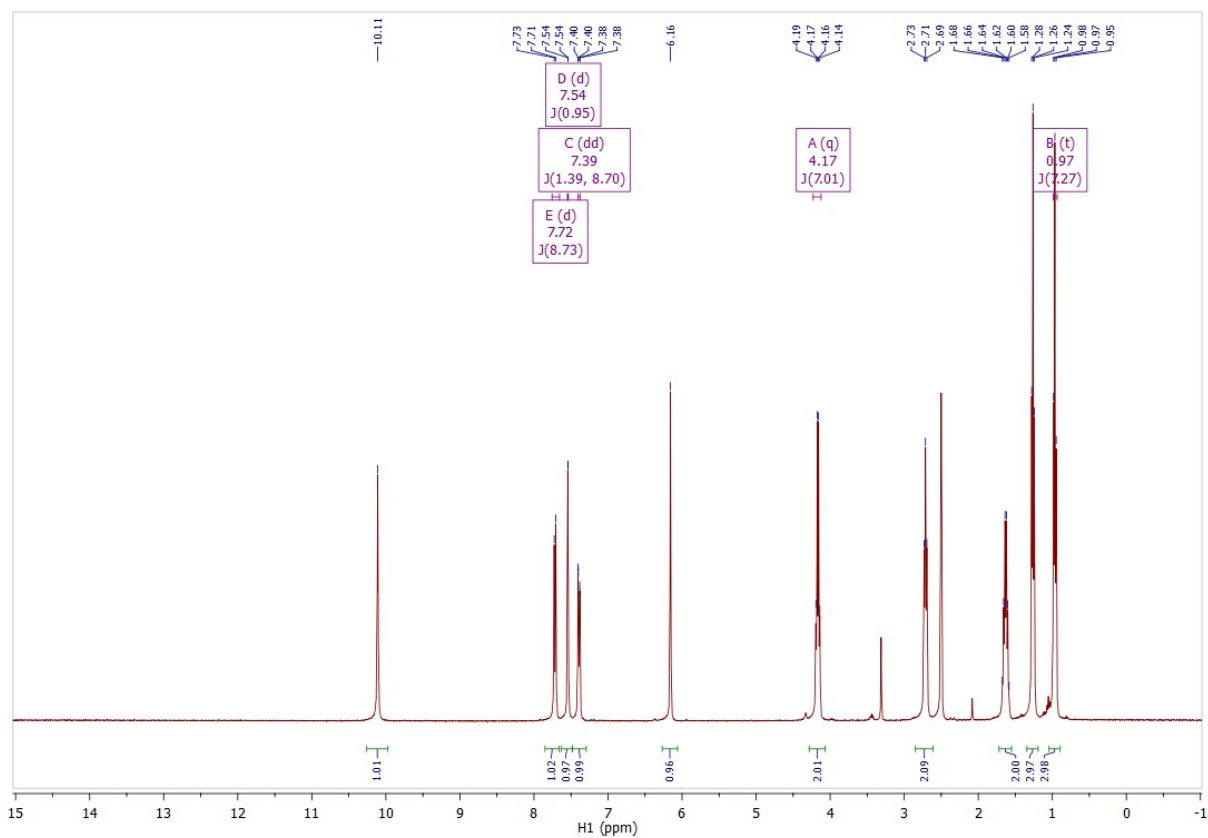

Figure S45.  $^1\text{H}$  NMR spectrum of 3ae

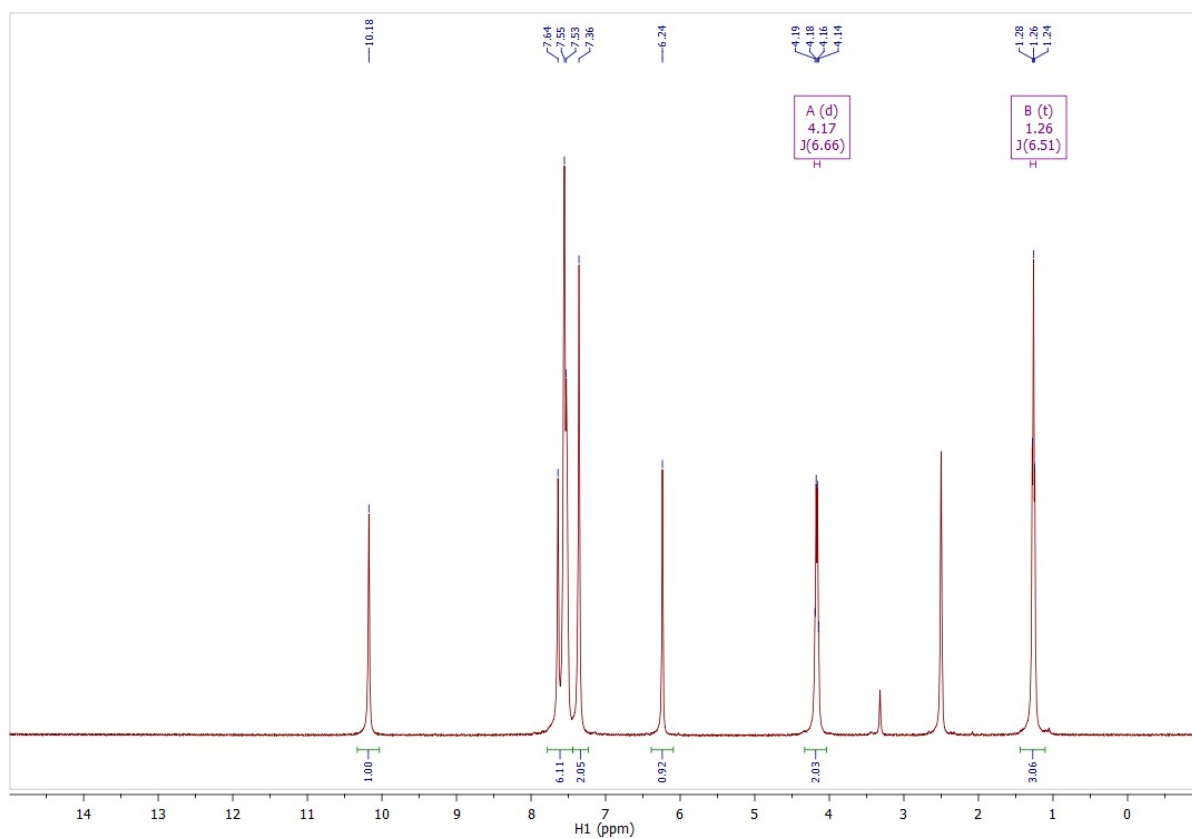

Figure S46.  $^1\text{H}$  NMR spectrum of 3af

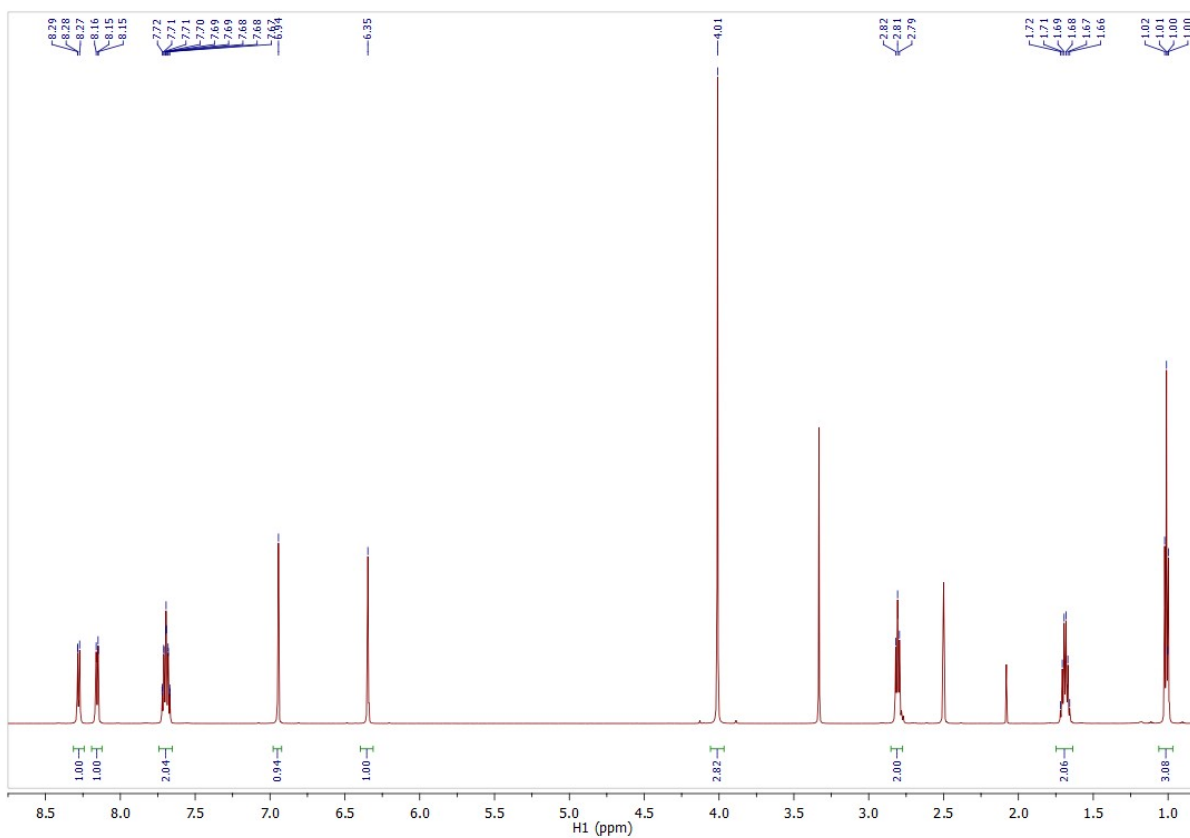

Figure S47. <sup>1</sup>H NMR spectrum of 3ag

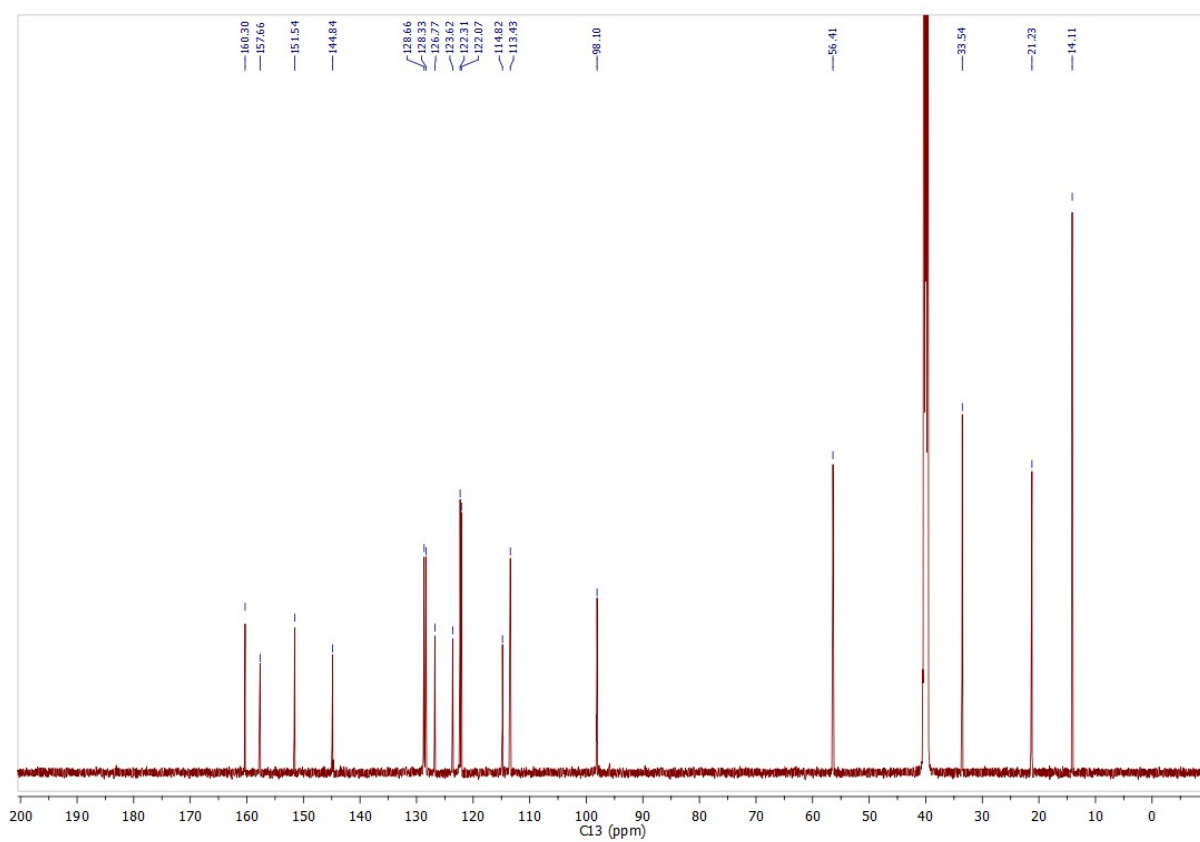

Figure S48. <sup>13</sup>C NMR spectrum of 3ag

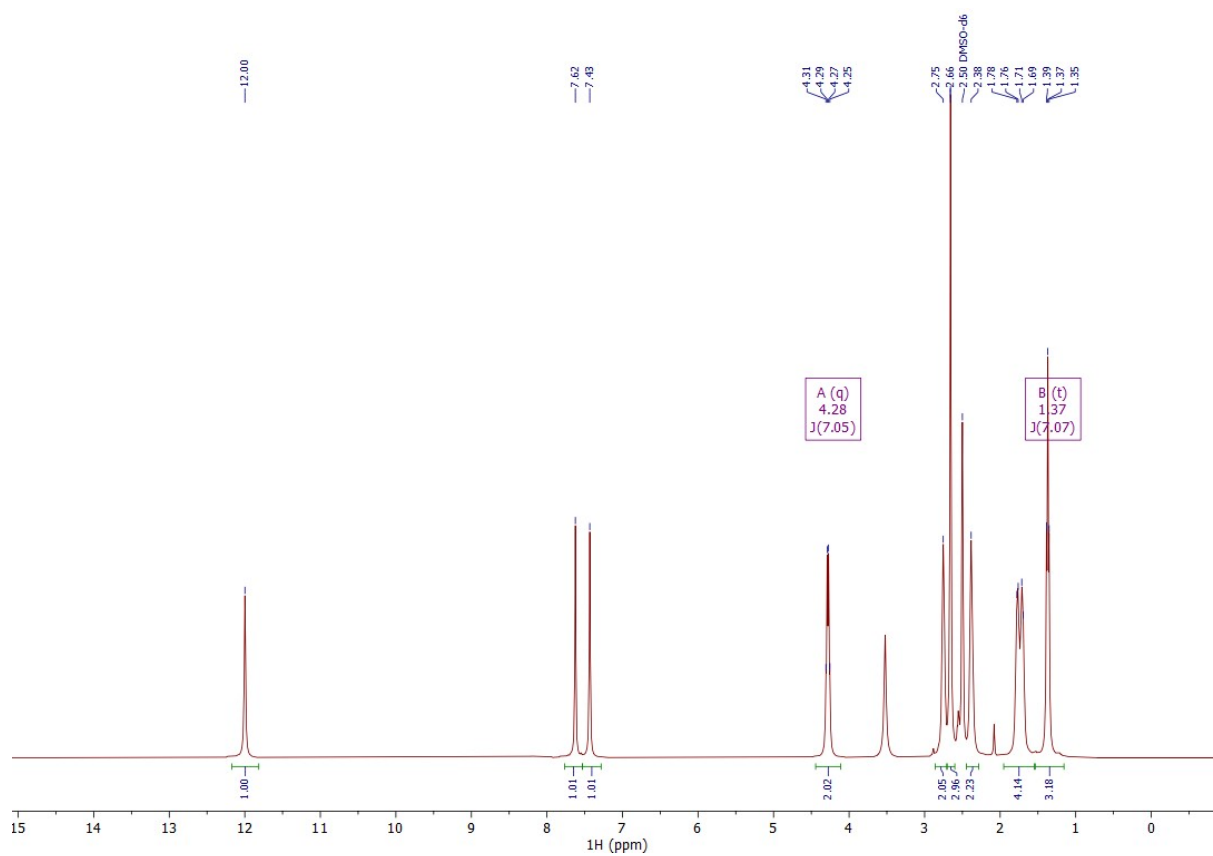

Figure S49.  $^1\text{H}$  NMR spectrum of 4a

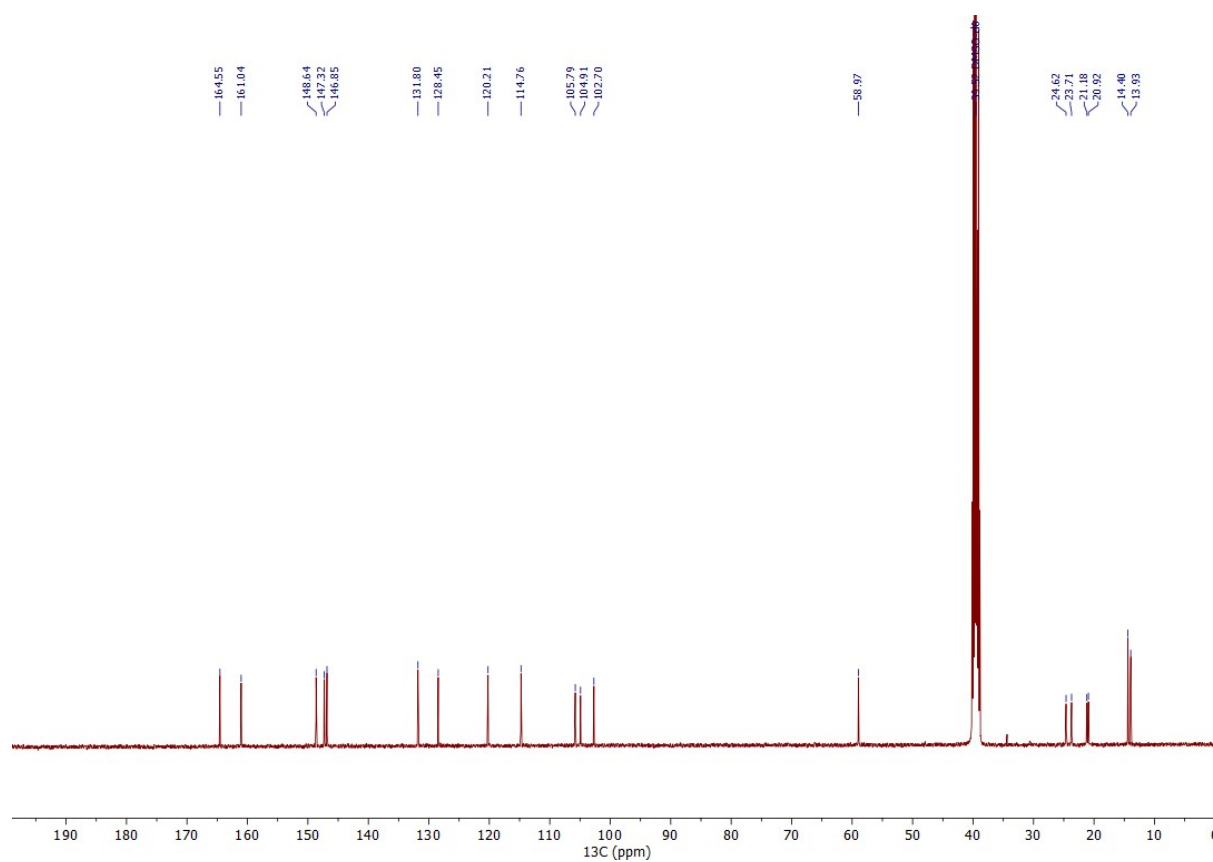

Figure S50.  $^{13}\text{C}$  NMR spectrum of 4a

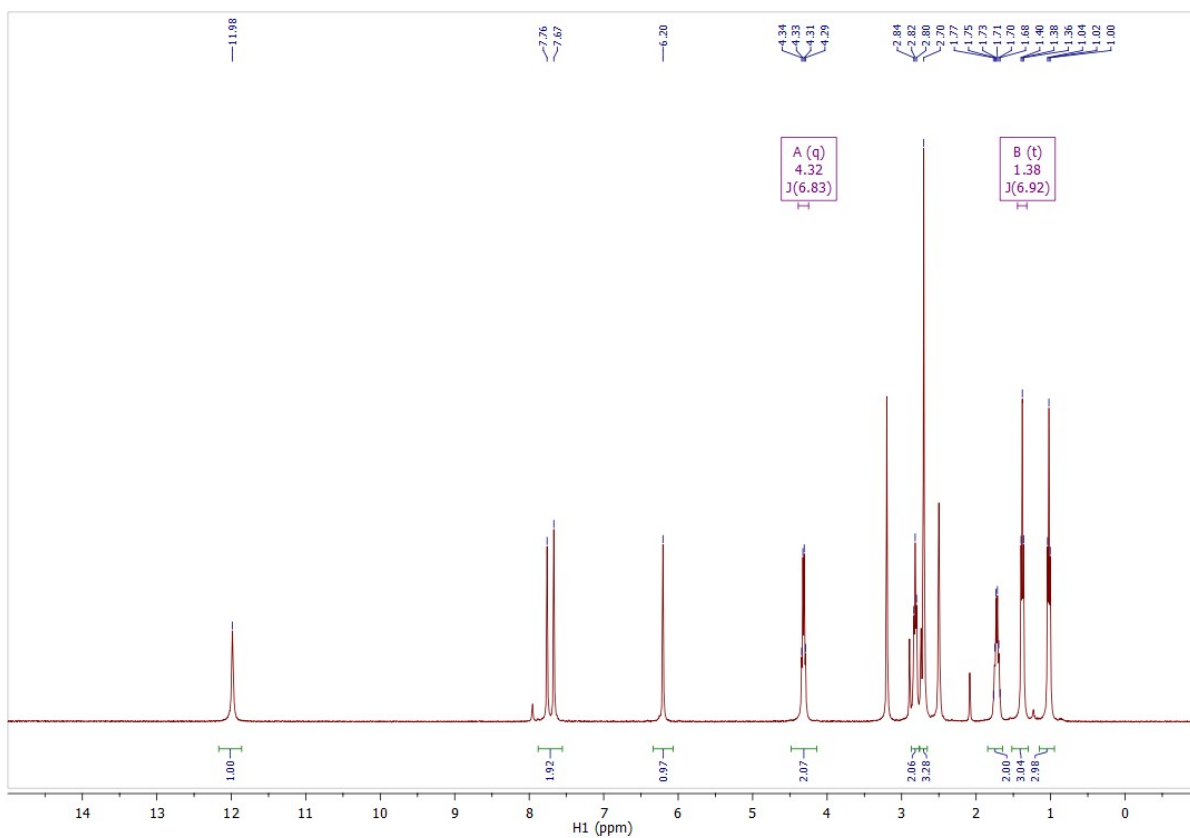

Figure S51.  $^1\text{H}$  NMR spectrum of 4b

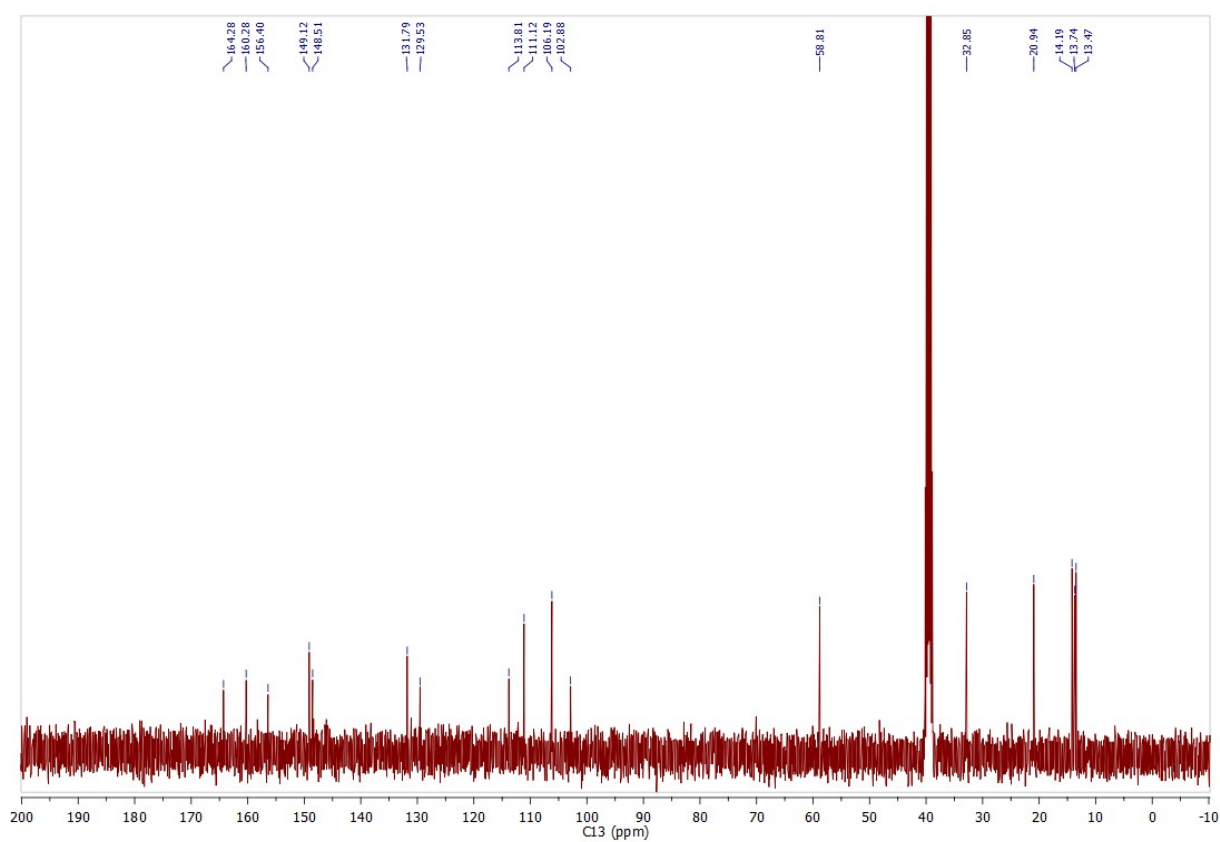

Figure S52.  $^{13}\text{C}$  NMR spectrum of 4b



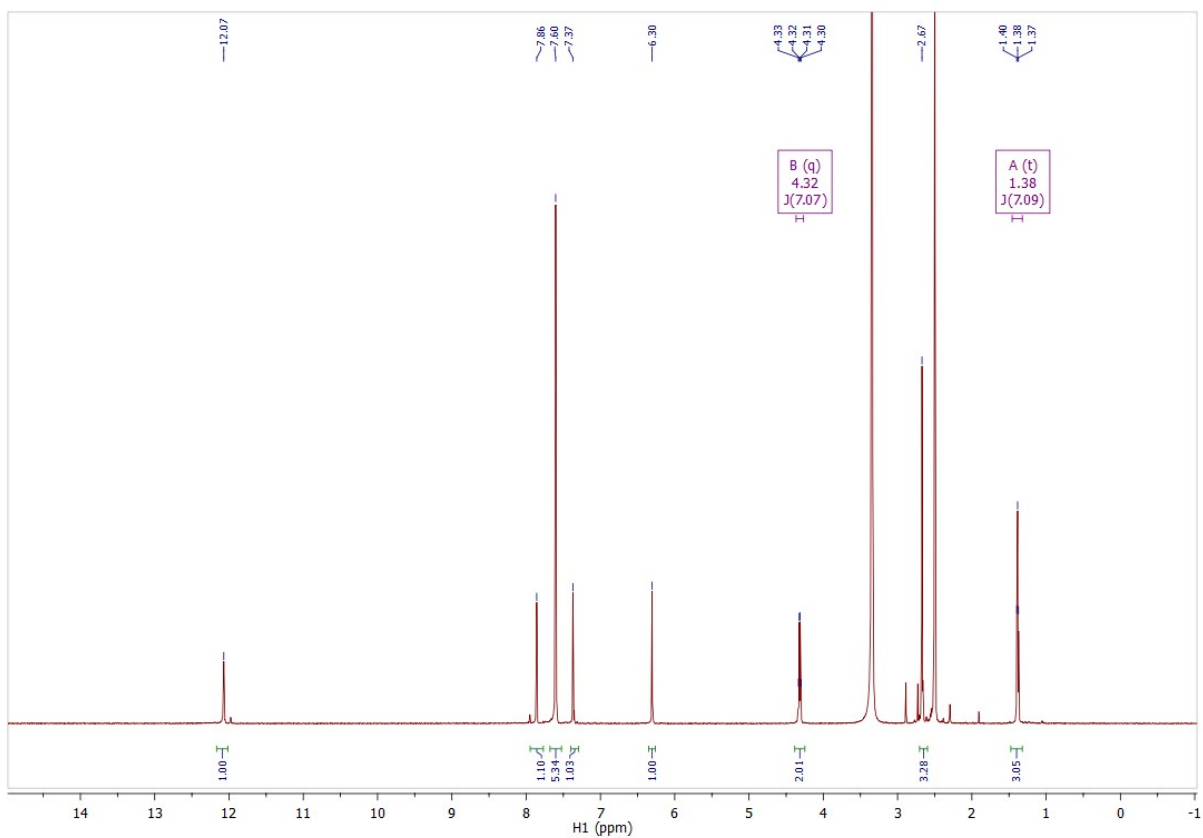

Figure S53.  $^1\text{H}$  NMR spectrum of 4c

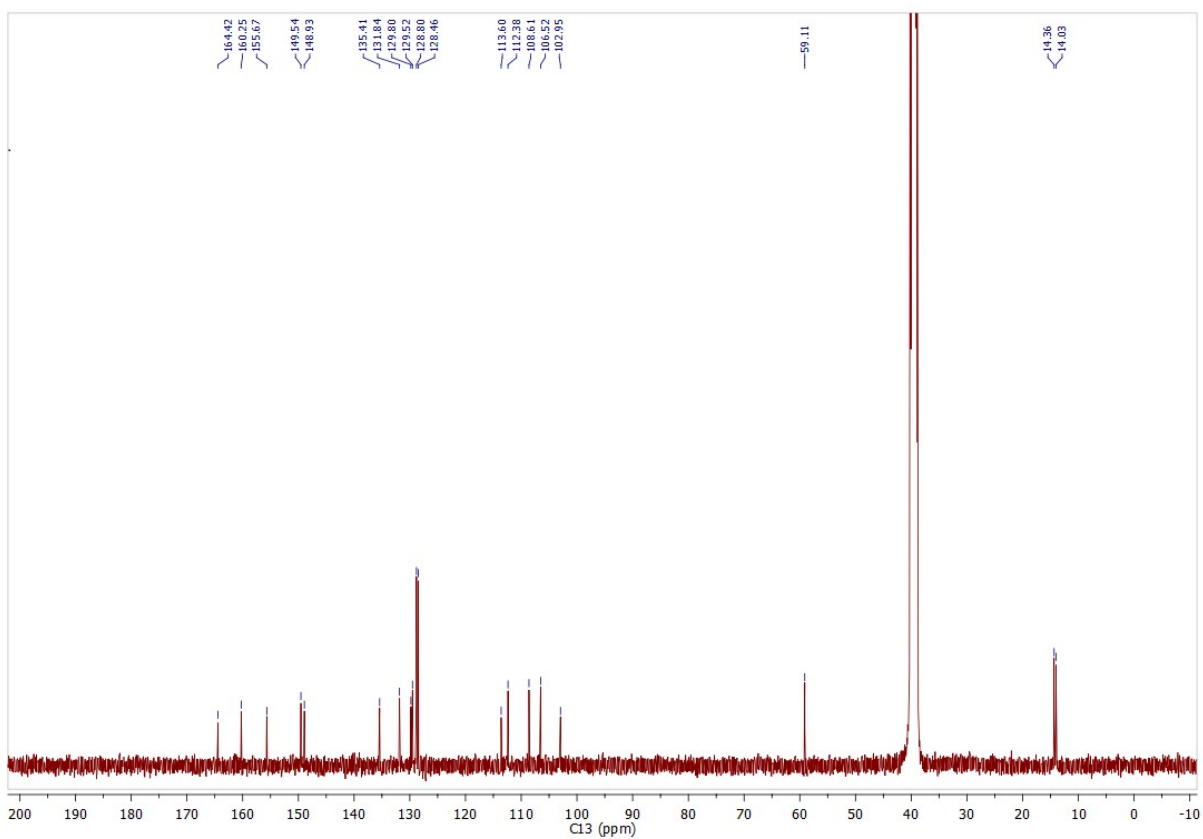

Figure S54.  $^{13}\text{C}$  NMR spectrum of 4c

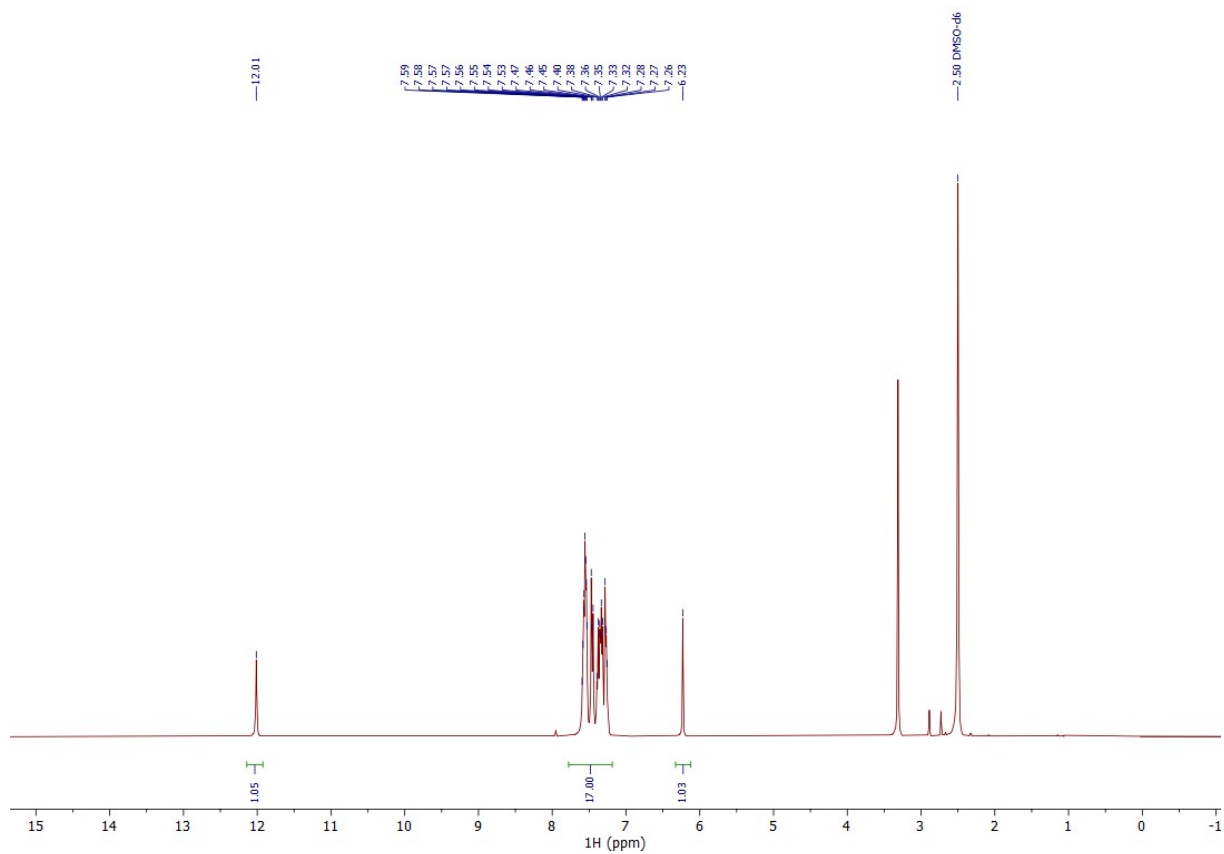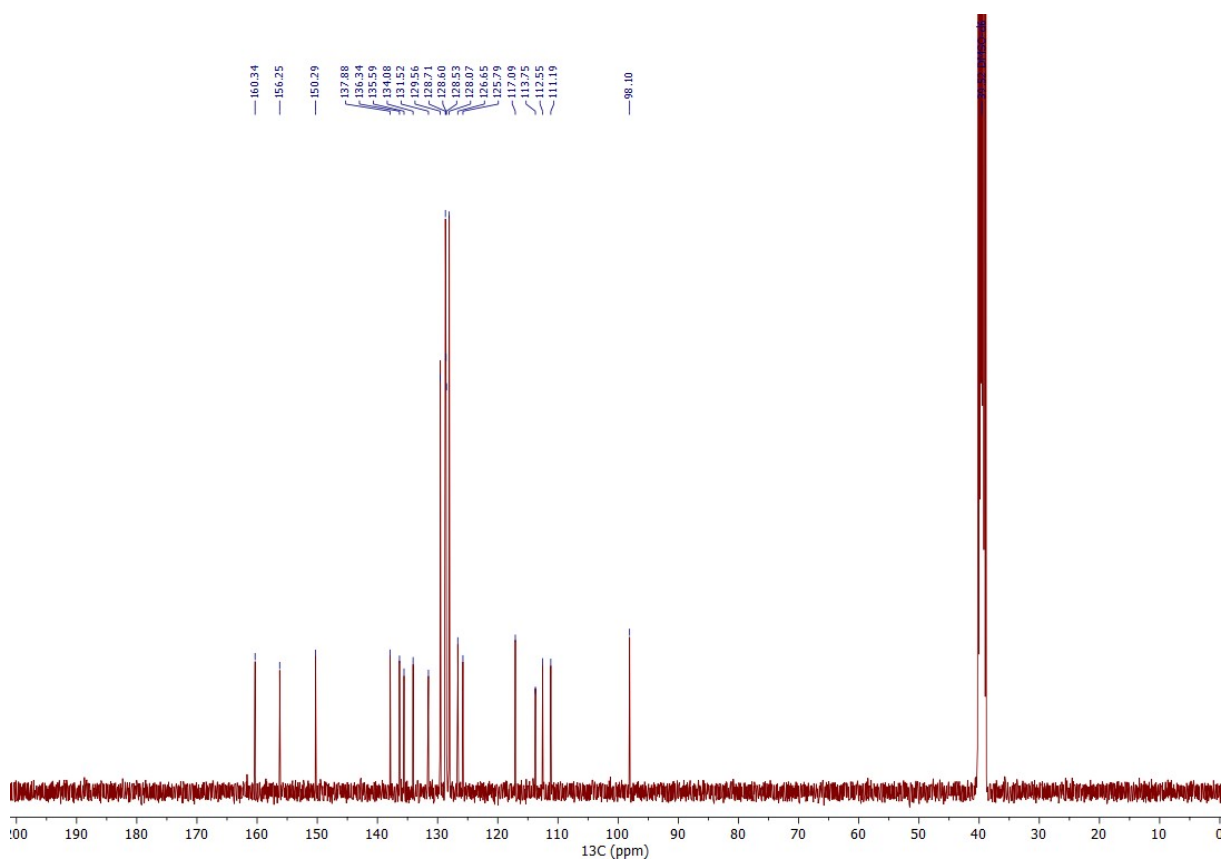

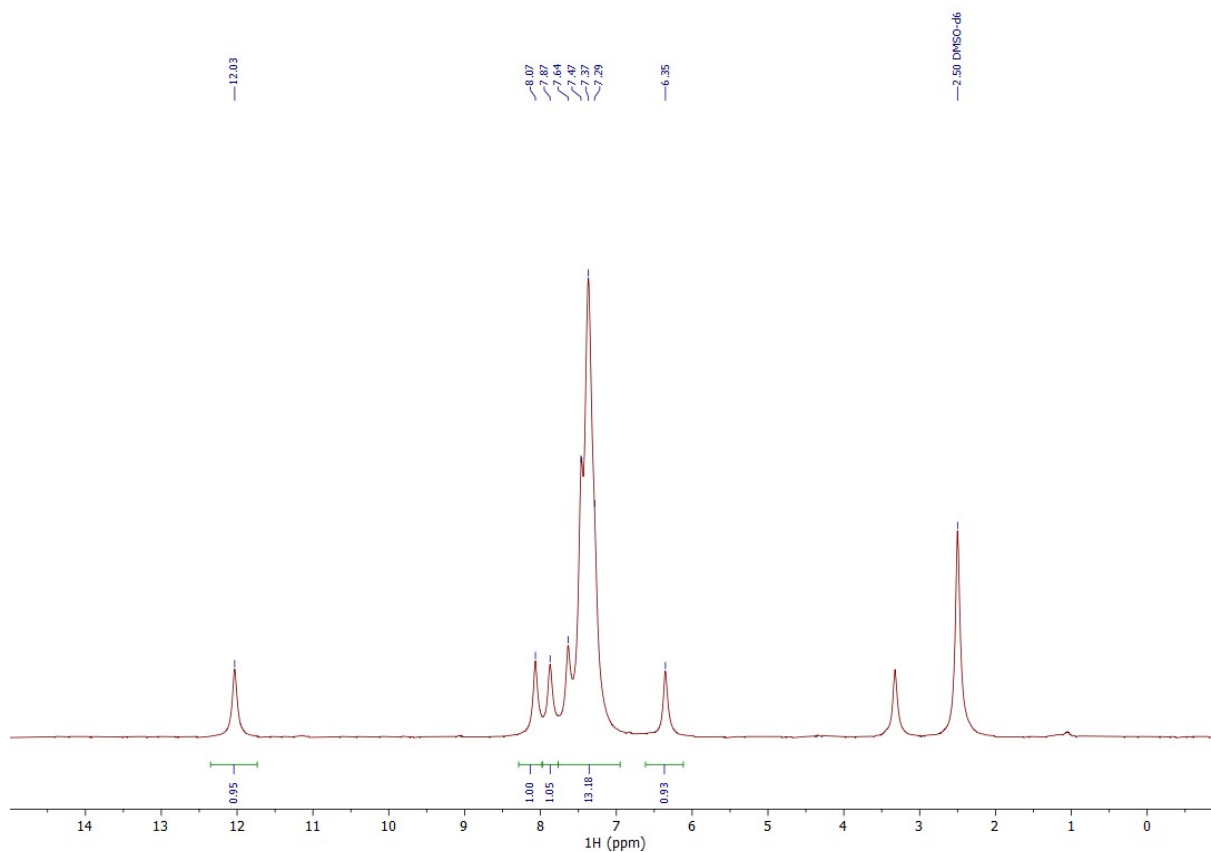

Figure S57.  $^{13}\text{C}$  NMR spectrum of 4e

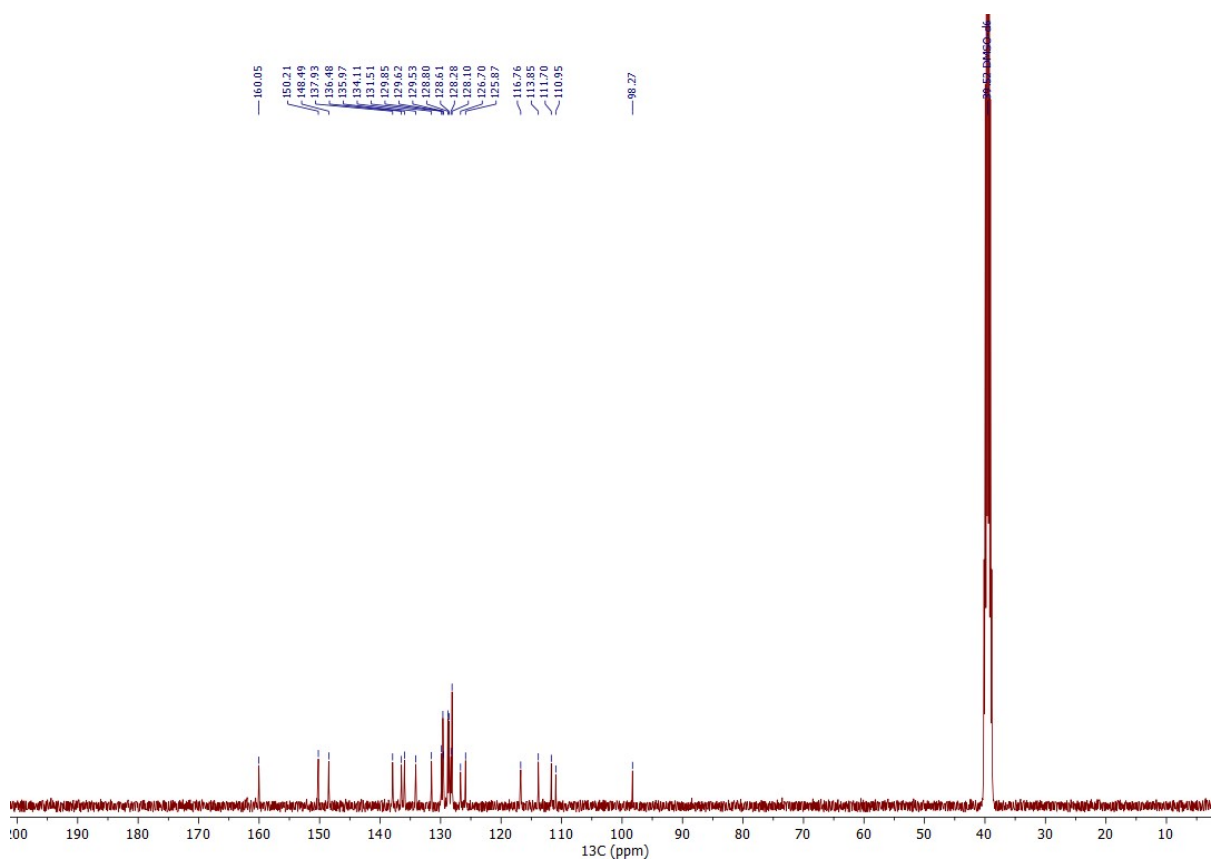

Figure S58.  $^{13}\text{C}$  NMR spectrum of 4e

2679.1.fid  
Halimbadzha SH 858-4

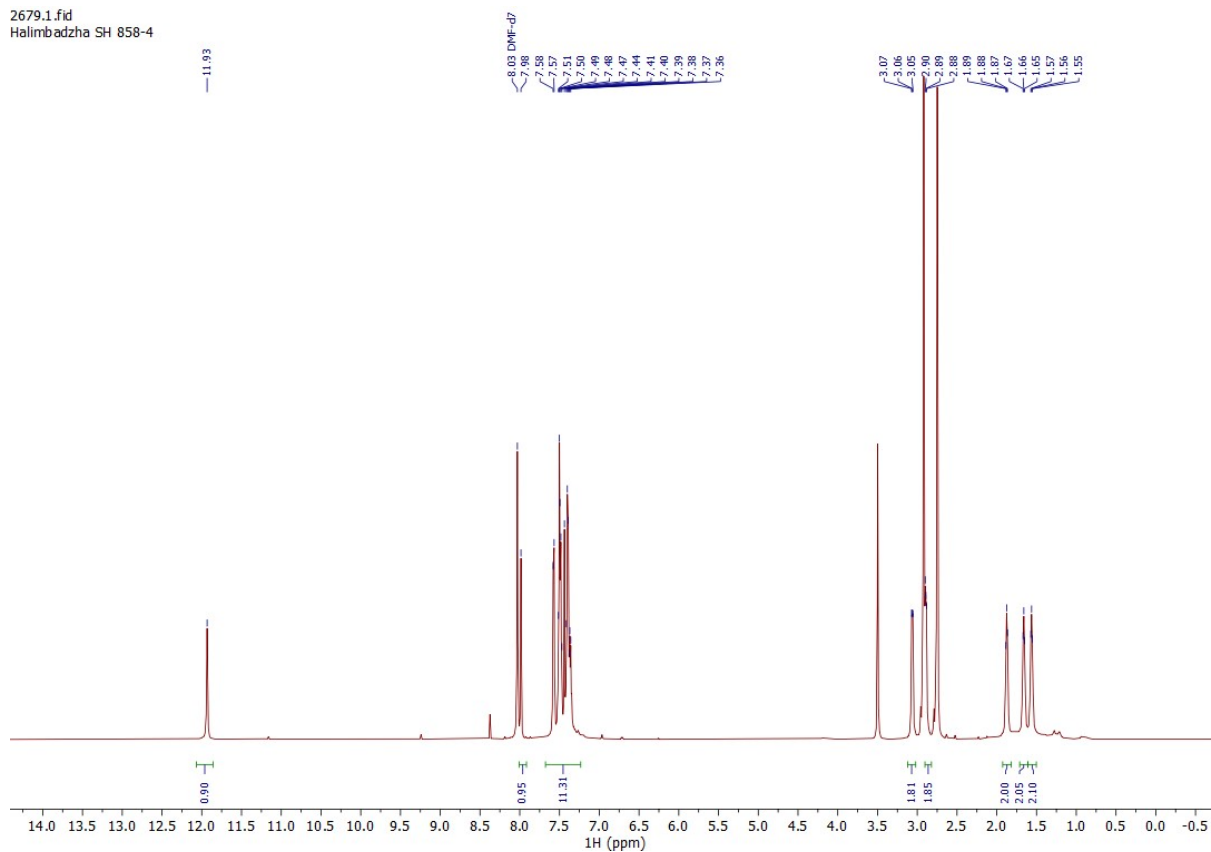

Figure S59. <sup>1</sup>H NMR spectrum of 4f

2679.13.fid  
Halimbadzha SH 858-4

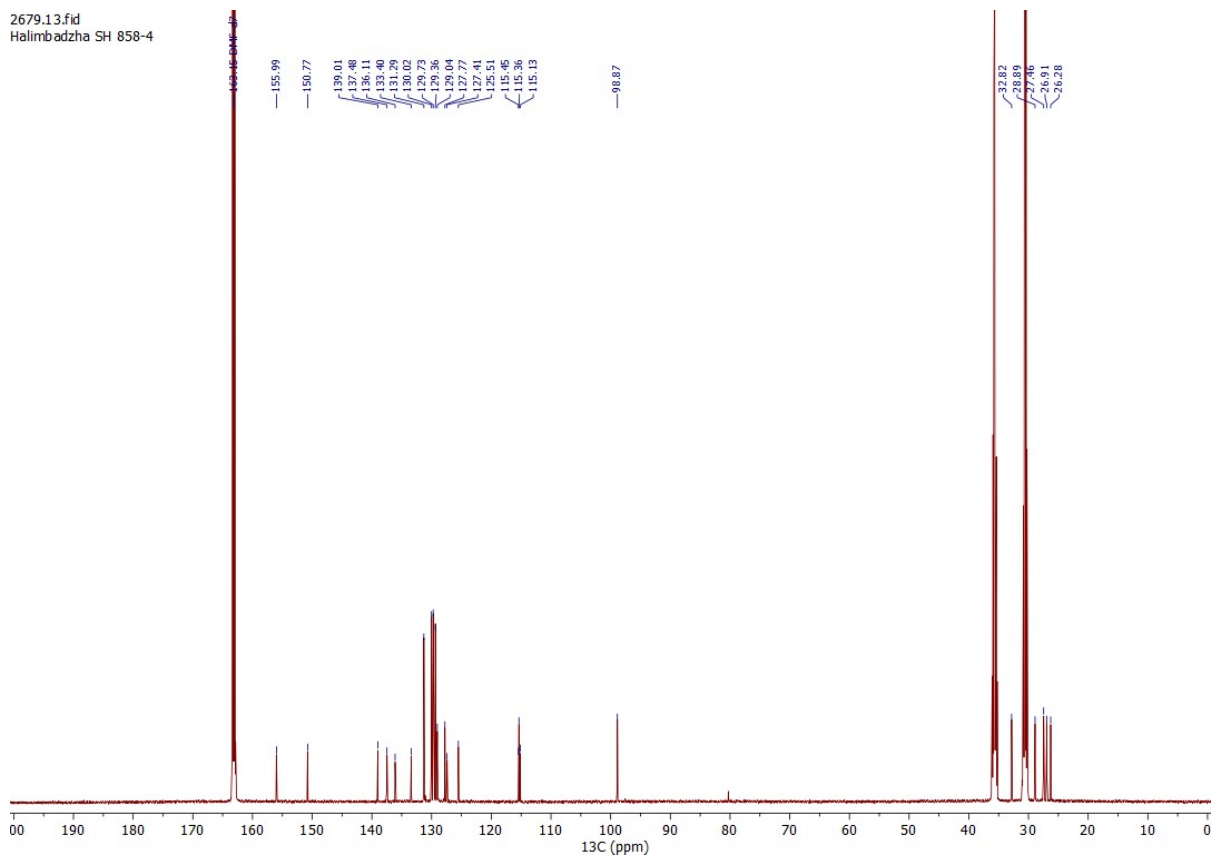

Figure S60. <sup>13</sup>C NMR spectrum of 4f

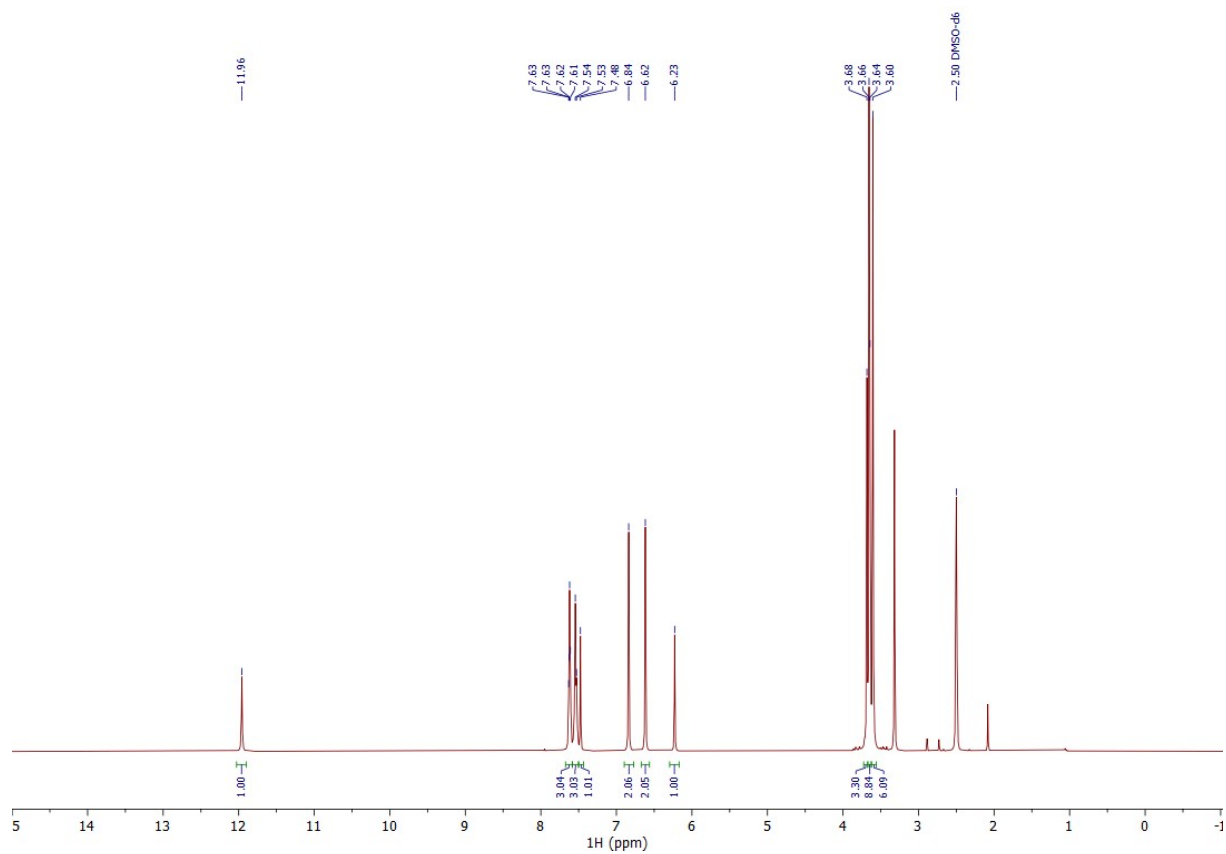

Figure S61. <sup>1</sup>H NMR spectrum of 4g

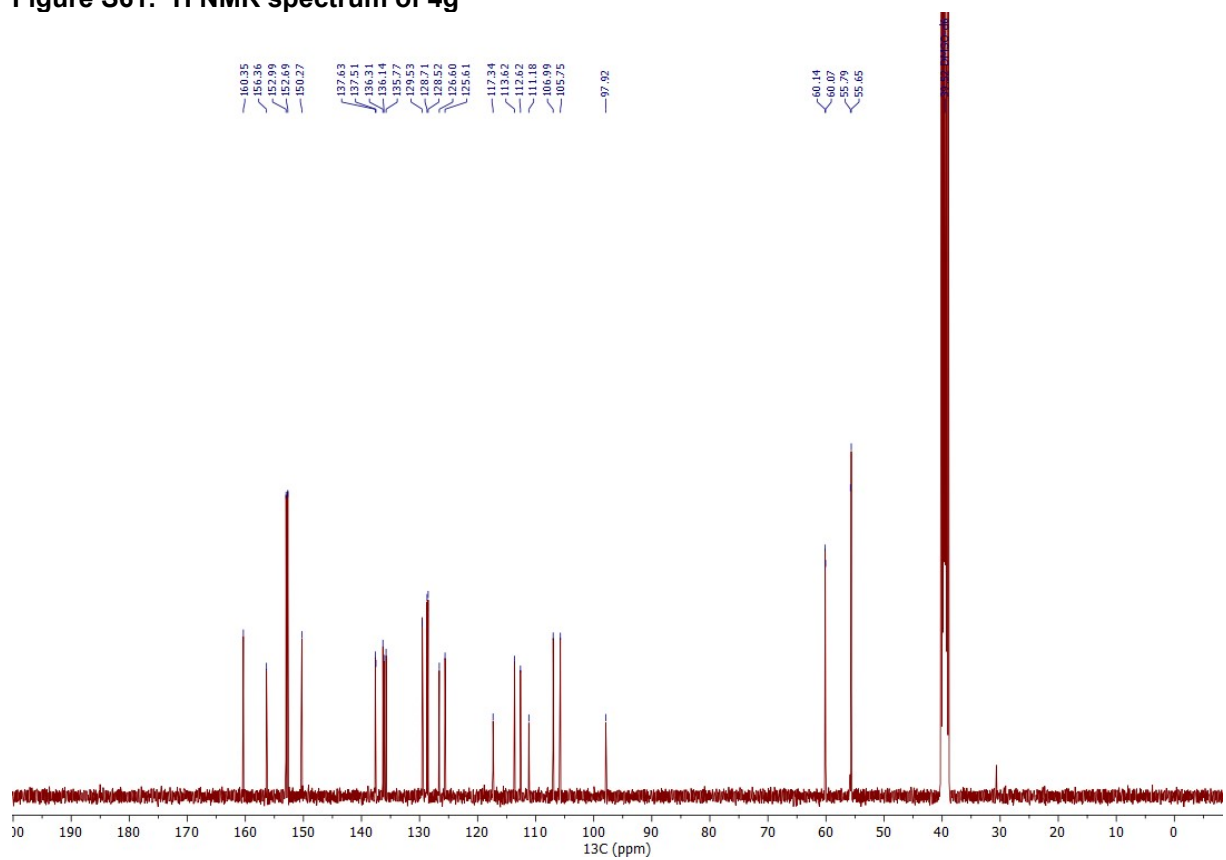

Figure S62. <sup>13</sup>C NMR spectrum of 4g

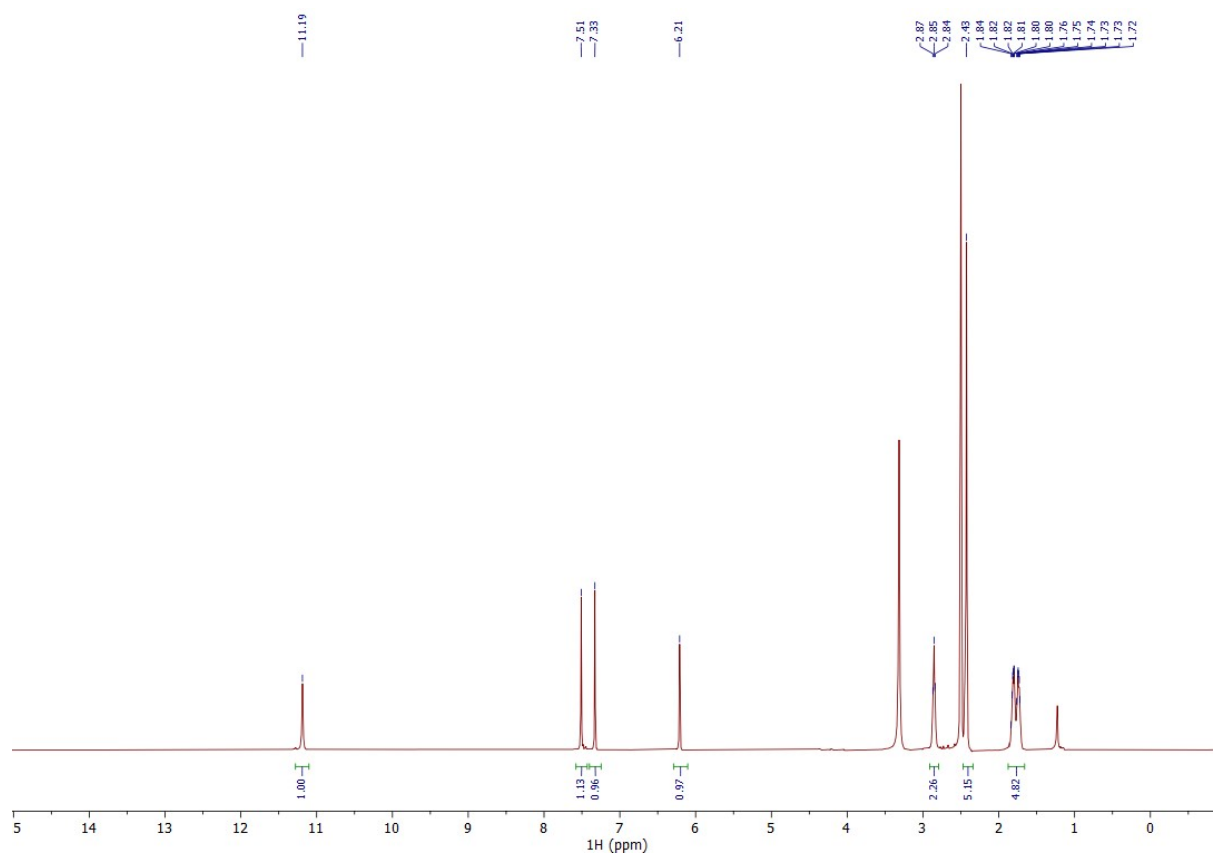

Figure S63. <sup>1</sup>H NMR spectrum of 6a

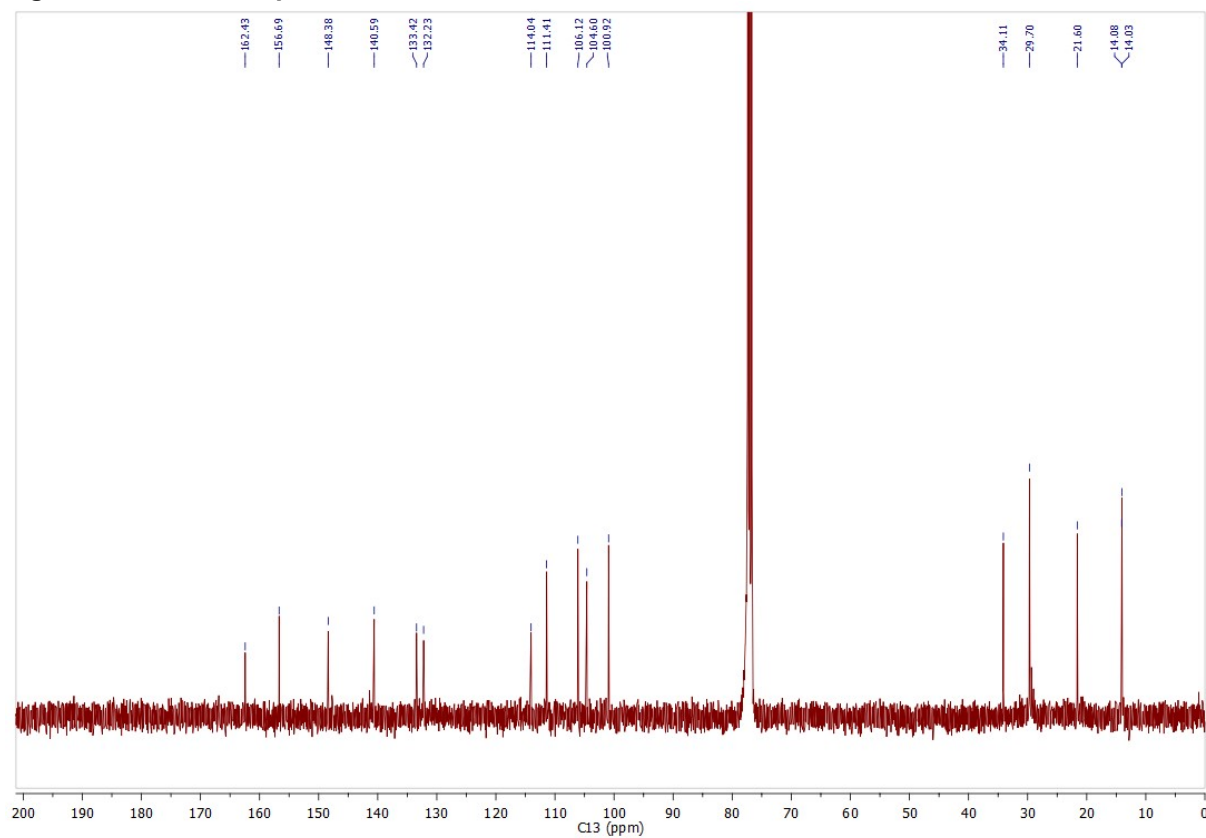

Figure S64. <sup>13</sup>C NMR spectrum of 6a

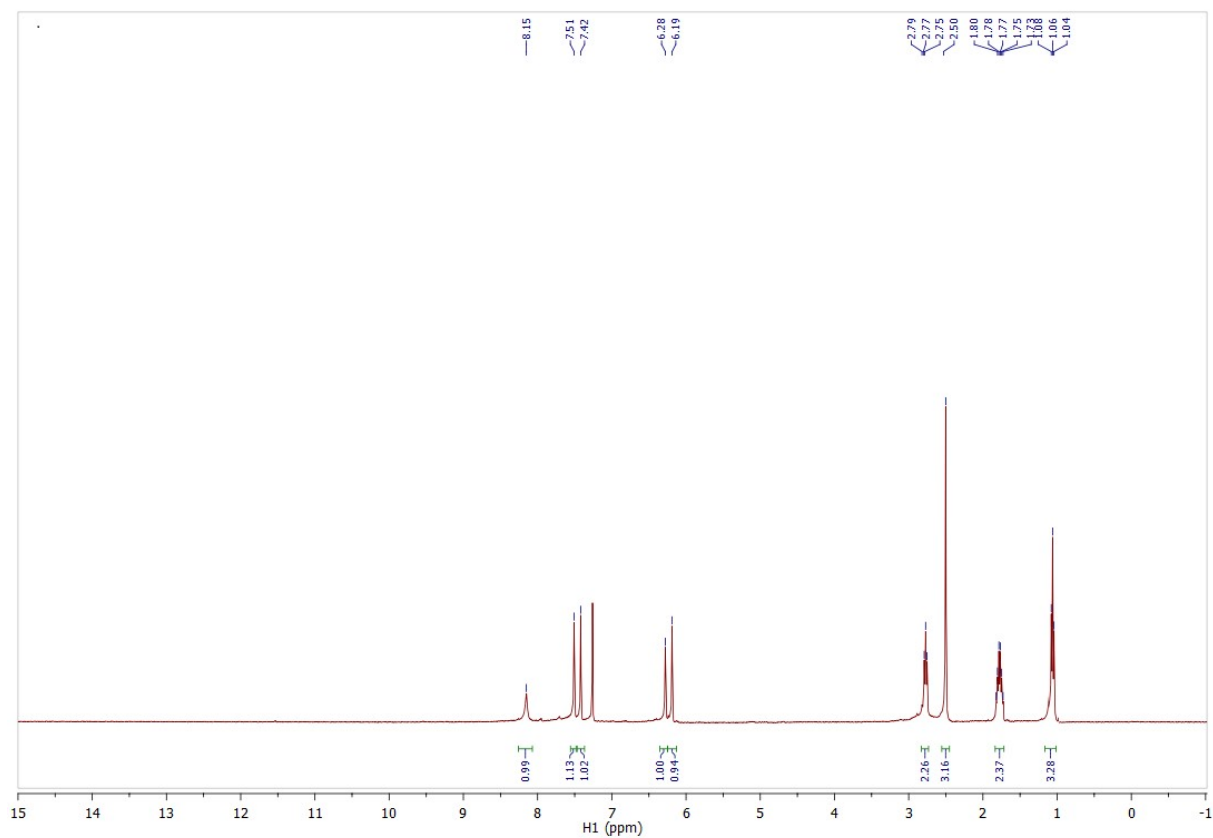

Figure S65. <sup>1</sup>H NMR spectrum of 6b

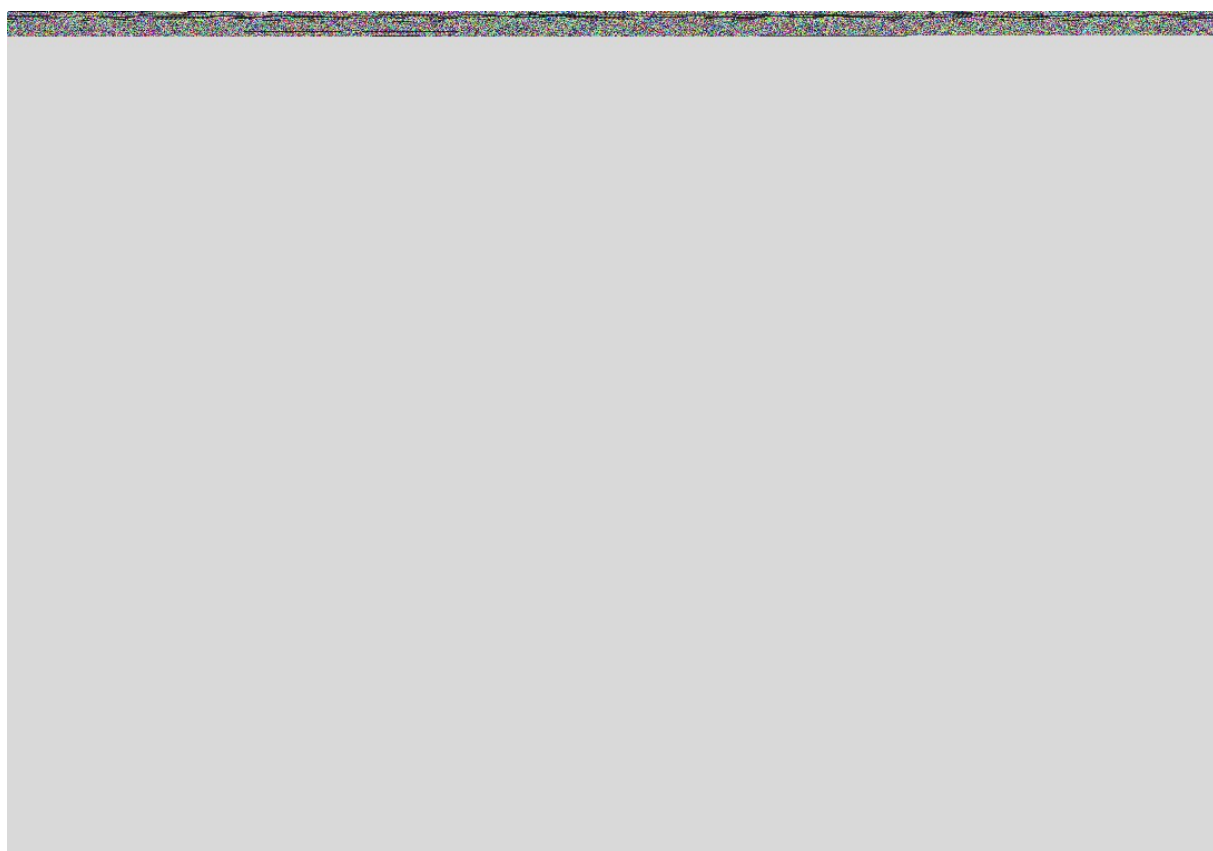

Figure S66. <sup>13</sup>C NMR spectrum of 6b
